# Supplementary material
Source: PubMed Central journal article supplement (PMC3183836)

**Supplemental Figure 1.** The optimal CE range for Glu1-fibrinopeptide B [transition: 786.2 (+2) → 684.4 (+1, y6 ion)] under (a) CID and (b) PQD.

(a) CID:

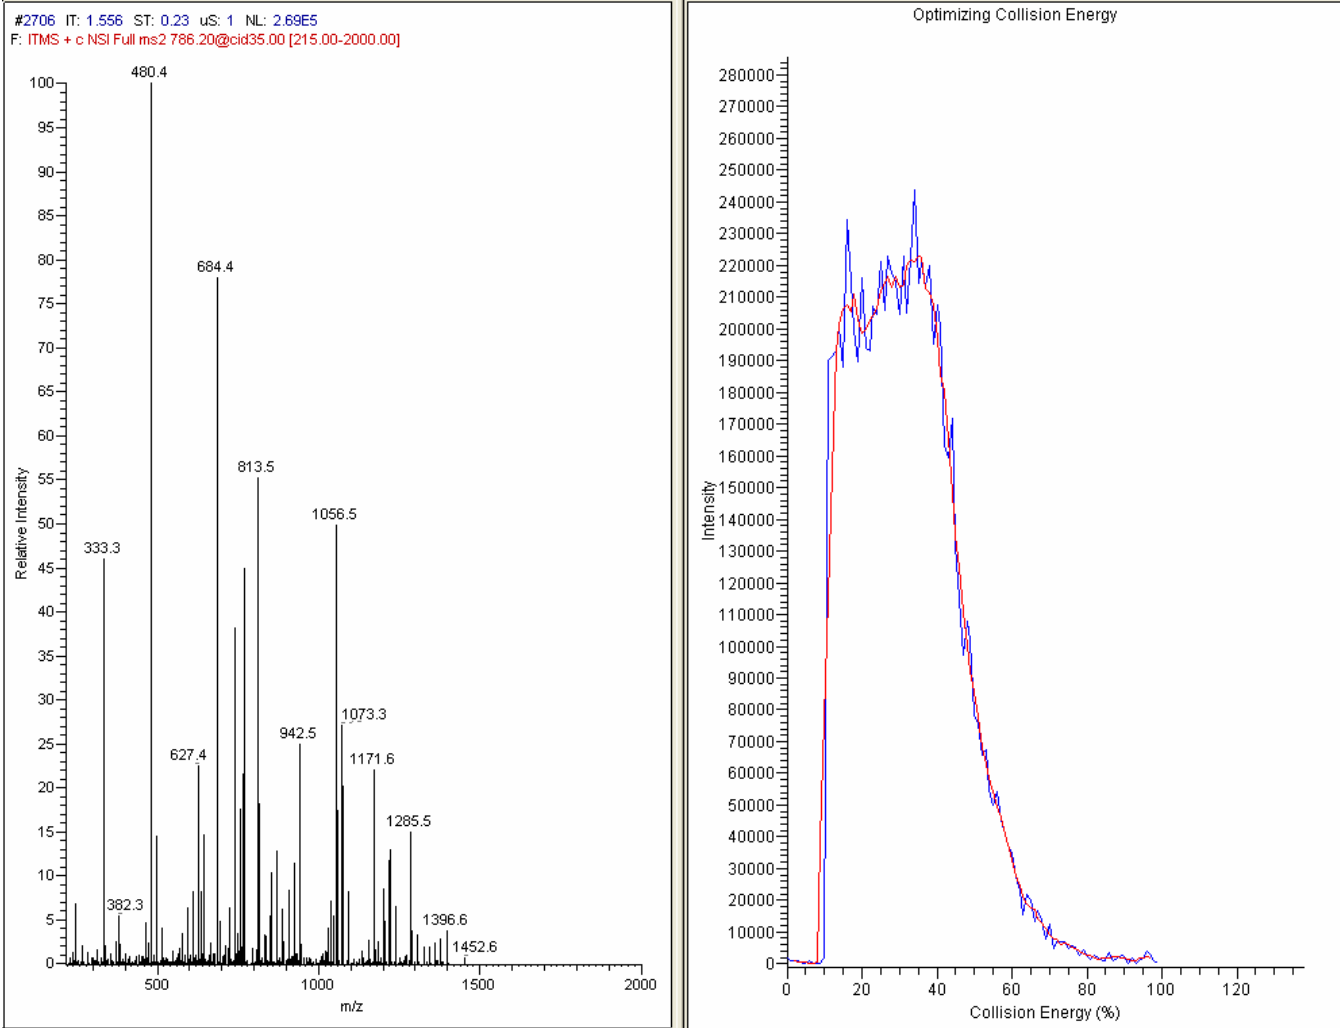

(b) PQD:

#5093 IT: 1.689 ST: 0.20 uS: 1 NL: 9.18E4  
F: ITMS + c NSI Full ms2 786.20@pqd30.00 [215.00-2000.00]

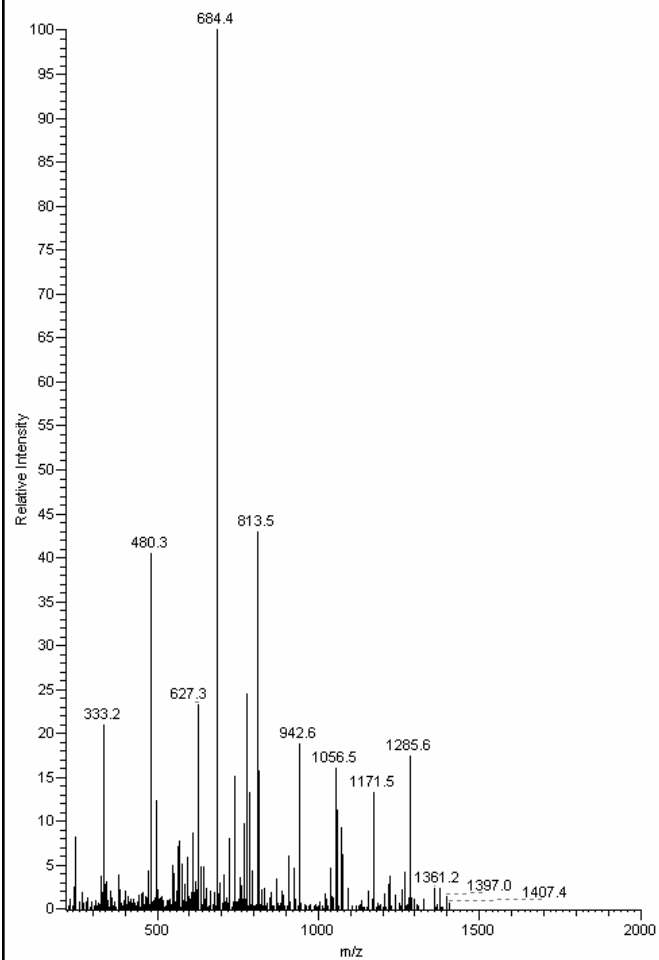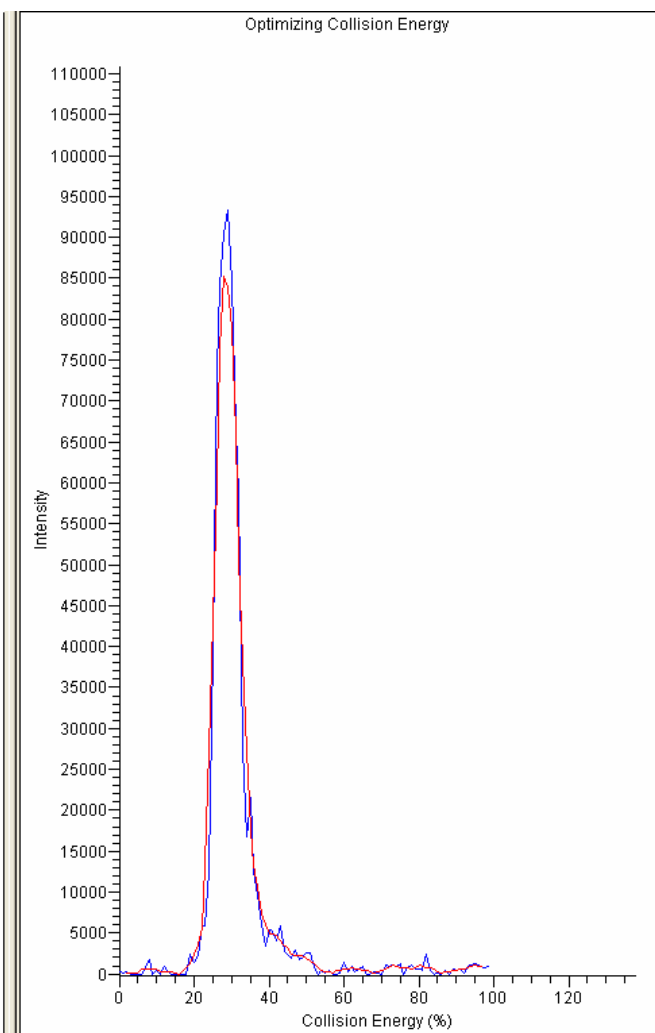

**Supplemental Figure 2.** Box and whisker plot of relative Xcorr scores ( $X_{\text{corr}}^{\text{PQD}}/X_{\text{corr}}^{\text{CID}}$ ) of the 6-protein mixture, using settings of  $\text{PQD}_{\text{default}}$ ,  $\text{PQD}_{\text{modified}}$  (standard mobile phases\*), and  $\text{PQD}_{\text{modified}}$  (with 0.1% m-NBA in the standard mobile phases).

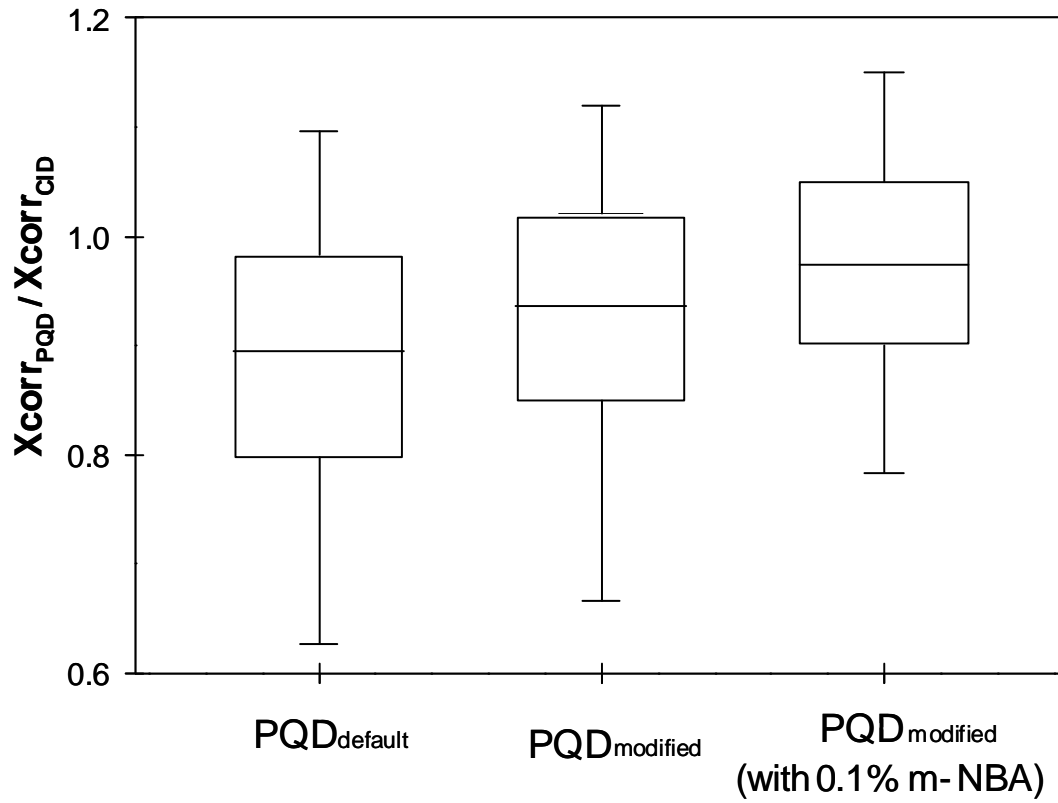

\* Water with 0.1% formic acid (mobile phase A); acetonitrile with 0.1% formic acid (mobile phase B).

**Supplemental Figure 3.** (a) CID and (b) PQD mass spectra of triply charged DRVYIHPFHL (angiotensin I) acquired at collision energy of 35% on an LTQ.

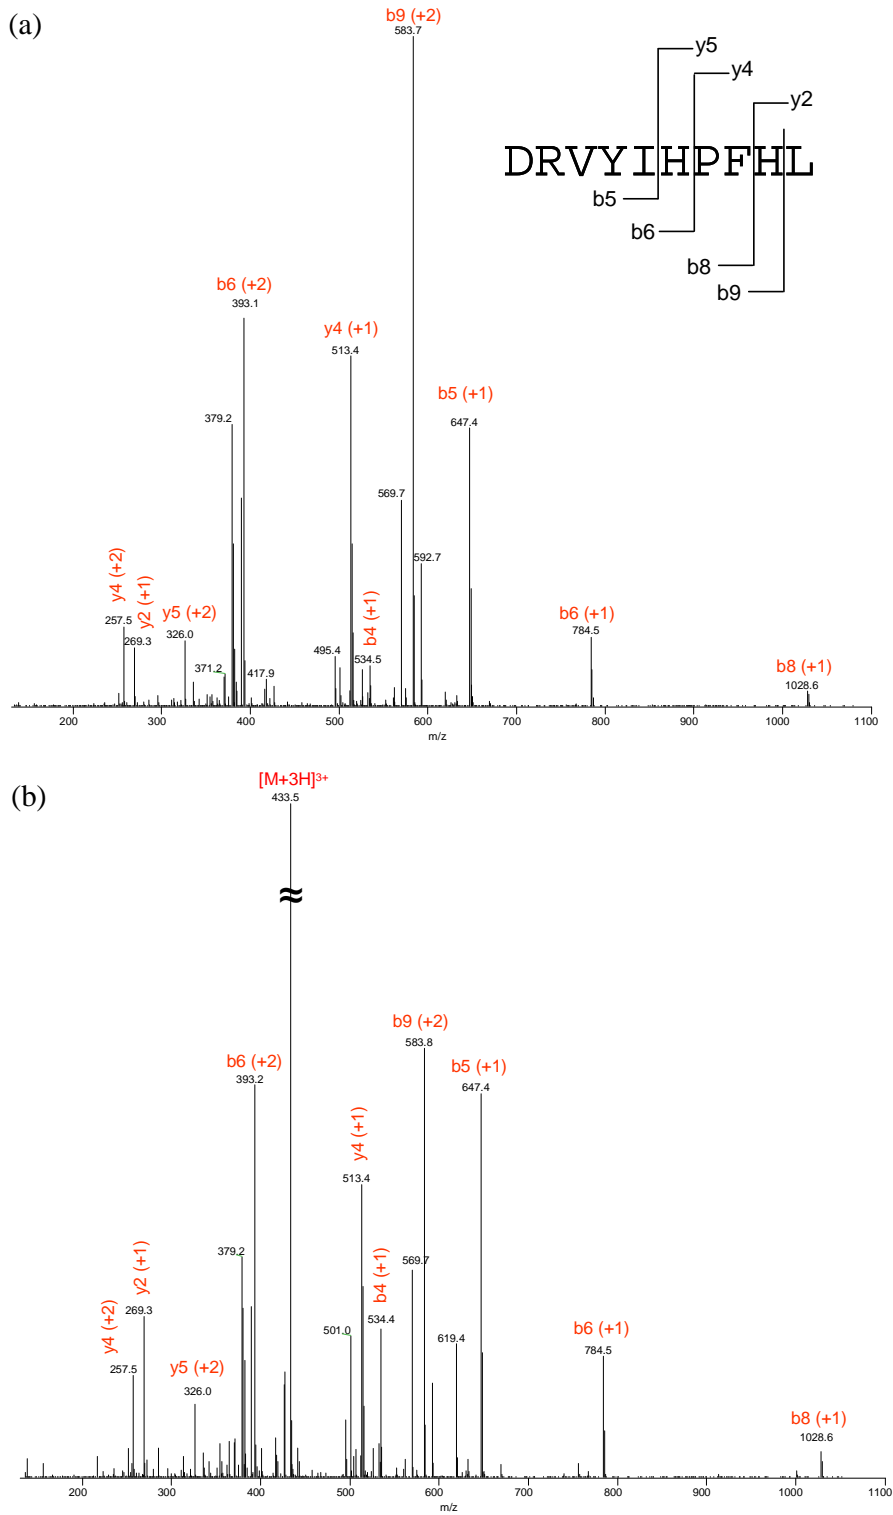

**Supplemental Figure 4.** Tandem mass spectra of (a) conventional CID, (b) PQD, and (c) triple quadrupole-type collision, respectively, of FQS(phos)EEQQQTEDELQDK, with some fragment ions indicated.

The collision energy were 35%, 30%, and 50 (based on rolling collision energy of Qtrap 4000), for CID, PQD, and QqQ, respectively.

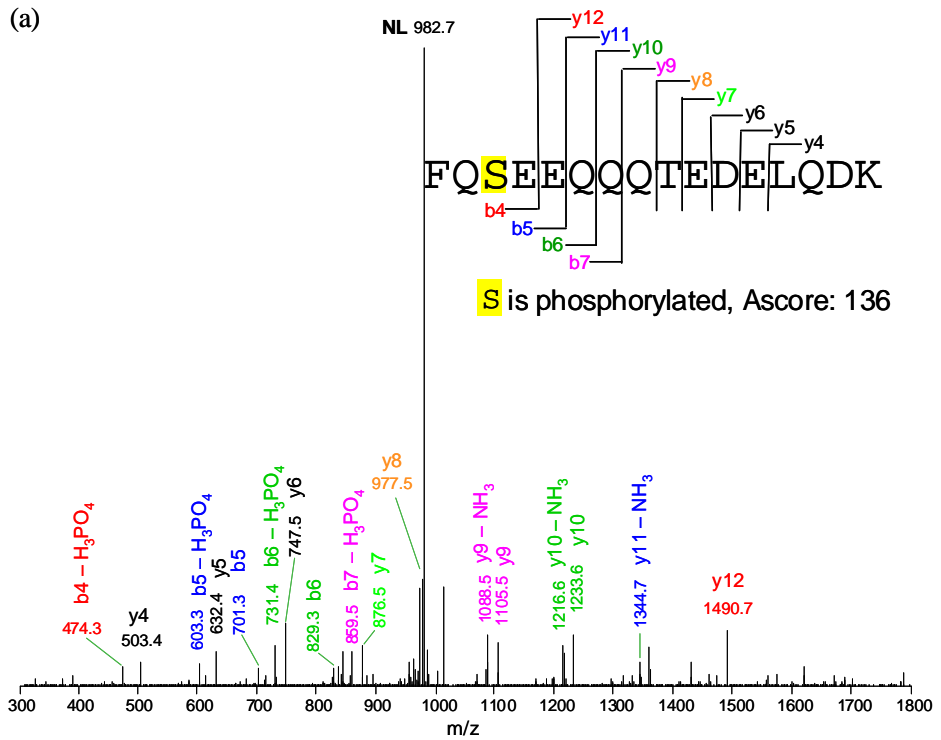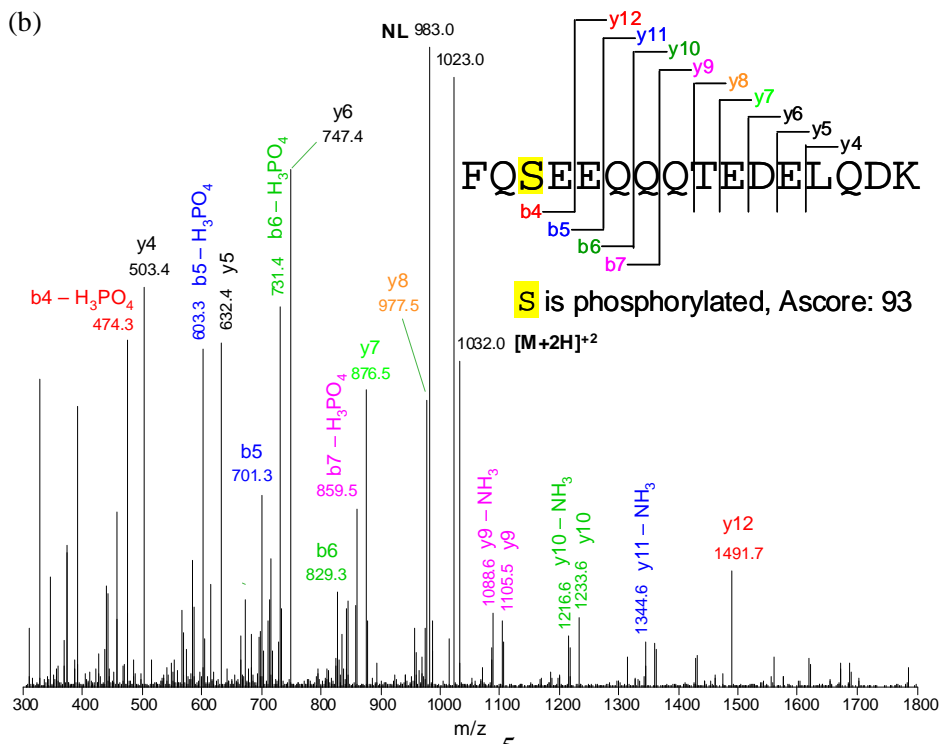

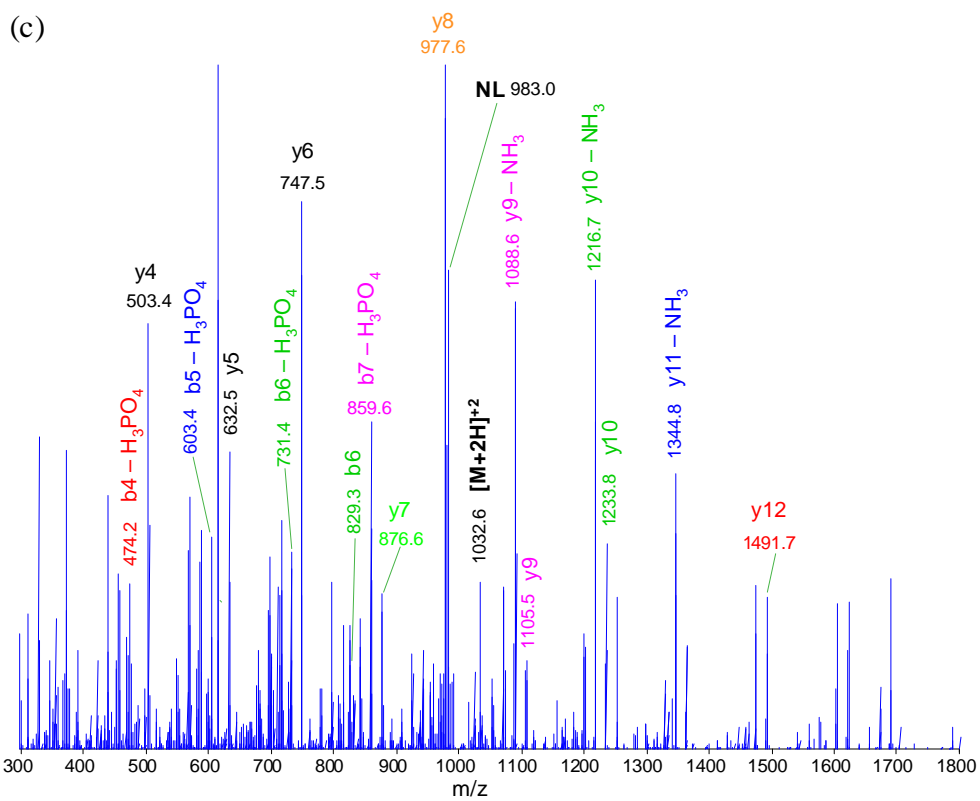

**Supplemental Figure 5.** Tandem mass spectra of (a) CID, (b) default PQD, and (c) triple quadrupole-type collision, respectively, of TRDIY(phos)ETDYRK with some fragment ions indicated. (collision energy: 35%, 25%, and 34 based on rolling collision energy, respectively).

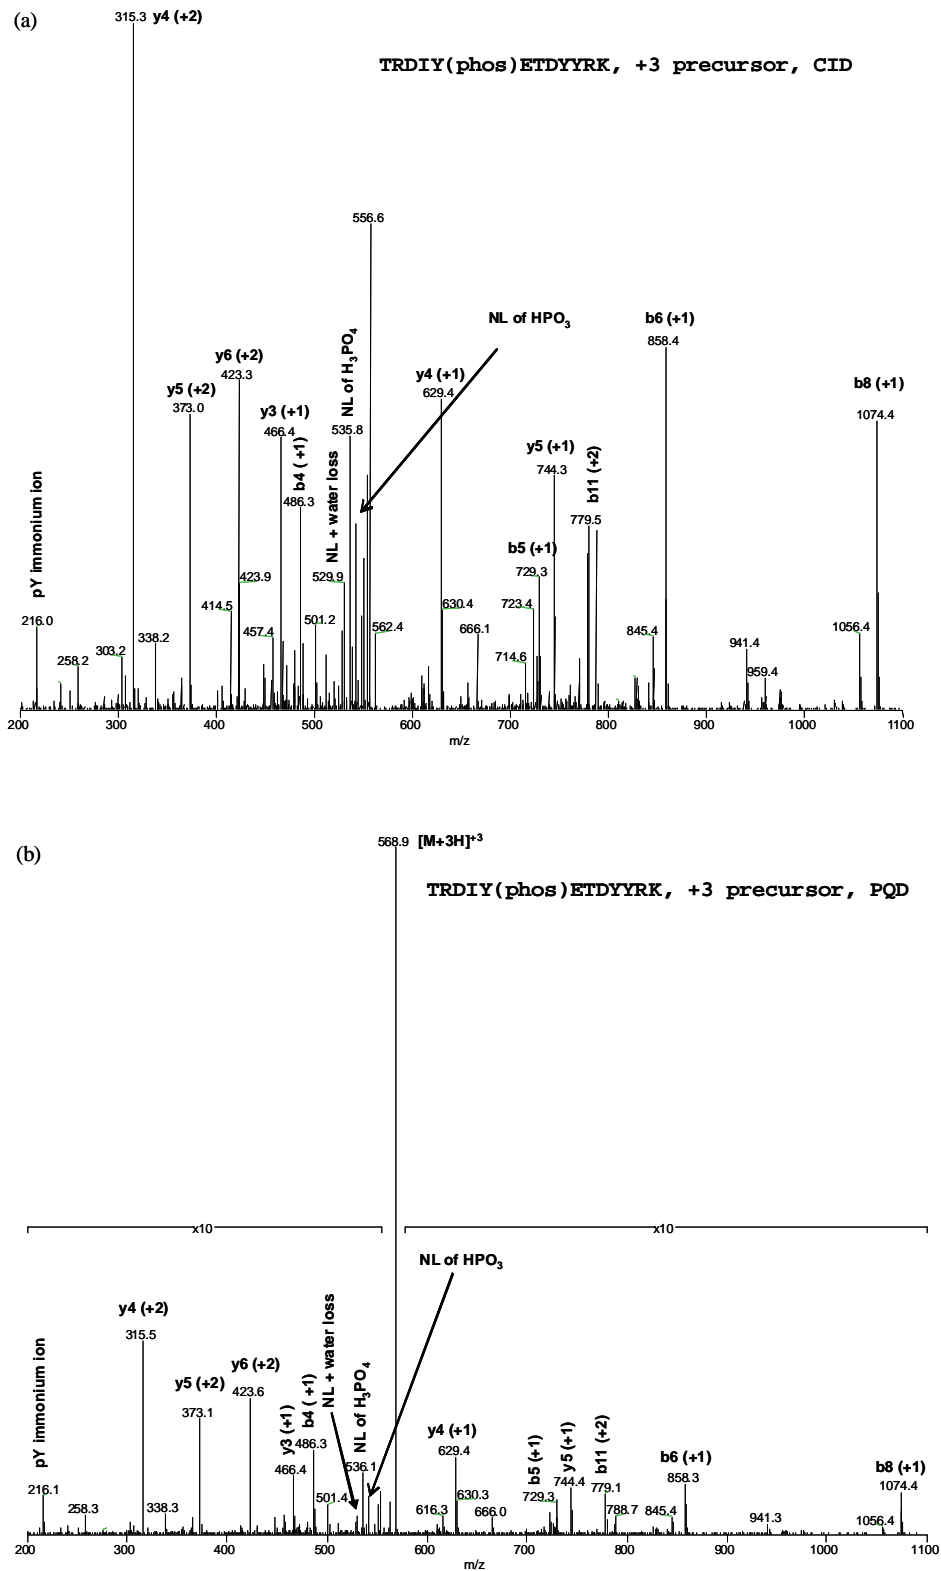

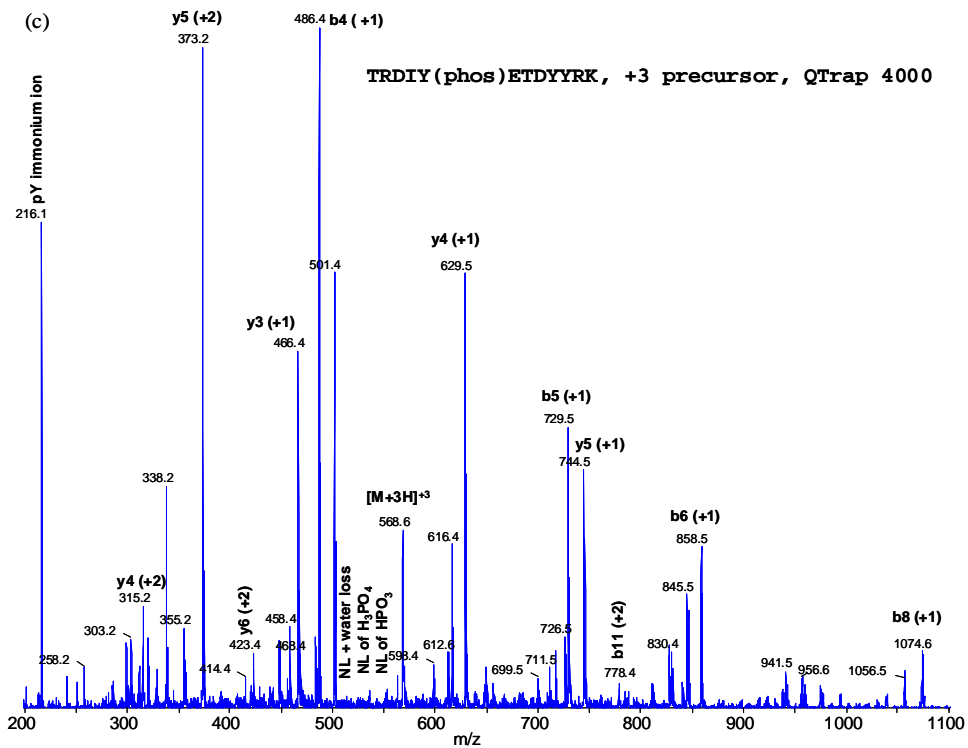

Supplement: NIHMS324680-supplement-supp_figs_1-5.pdf [file NIHMS324680-supplement-supp_figs_1-5.pdf]
