# Supplementary material
Source: PubMed Central journal article supplement (PMC3183836)
Supplement: NIHMS324680-supplement-supp_table_1.pdf [file NIHMS324680-supplement-supp_table_1.pdf]

|           |                             |        |   |      |        |        |         |      |      |      |
|-----------|-----------------------------|--------|---|------|--------|--------|---------|------|------|------|
| 5714-5715 | R.CELAAAMK.R                | 1170.8 | 2 | 3.29 | 0.3906 | 1465.4 | 1 14/14 | 3.45 | 3.18 | 0.92 |
| 5732-5733 | K.GTDVQAWIR.G               | 1189.7 | 2 | 3.35 | 0.3471 | 1134.8 | 1 16/16 | 3.52 | 3.76 | 1.07 |
| 5792-5793 | R.NLCNIPCSALLSSDITASVNCAK.K | 2763.7 | 3 | 5.64 | 0.4819 | 1711.3 | 1 35/88 | 5.35 | 5.46 | 1.02 |
| 5819-5820 | R.CELAAAMK.R                | 1170.8 | 2 | 3.42 | 0.3987 | 1700.6 | 1 14/14 | 3.42 | 3.05 | 0.89 |
| 5837-5838 | K.GTDVQAWIR.G               | 1189.7 | 2 | 2.99 | 0.369  | 653.3  | 1 16/16 | 3.18 | 2.74 | 0.86 |
| 5924-5925 | R.NLCNIPCSALLSSDITASVNCAK.K | 2763.7 | 3 | 5.80 | 0.5575 | 1844.9 | 1 37/88 | 5.52 | 5.26 | 0.95 |
| 5929-5930 | R.CELAAAMK.R                | 1170.8 | 2 | 3.30 | 0.4056 | 1843.7 | 1 14/14 | 3.37 | 3.2  | 0.95 |
| 5947-5948 | K.GTDVQAWIR.G               | 1189.7 | 2 | 2.85 | 0.1649 | 857.9  | 1 16/16 | 2.96 | 2.9  | 0.98 |
| 6042-6043 | R.NLCNIPCSALLSSDITASVNCAK.K | 2763.7 | 3 | 5.79 | 0.5245 | 1951.5 | 1 37/88 | 5.55 | 5.6  | 1.01 |
| 6044-6045 | R.CELAAAMK.R                | 1170.8 | 2 | 3.16 | 0.418  | 1952.9 | 1 14/14 | 3.4  | 2.96 | 0.87 |
| 6059-6060 | K.GTDVQAWIR.G               | 1189.7 | 2 | 3.52 | 0.3384 | 840.6  | 1 16/16 | 3.67 | 2.75 | 0.75 |
| 6162-6163 | R.NLCNIPCSALLSSDITASVNCAK.K | 2763.7 | 3 | 5.80 | 0.5551 | 1778   | 1 35/88 | 5.33 | 5.55 | 1.04 |
| 6197-6198 | R.CELAAAMK.R                | 1170.8 | 2 | 3.11 | 0.3837 | 1318.8 | 1 14/14 | 3.42 | 2.81 | 0.82 |
| 6214-6215 | K.GTDVQAWIR.G               | 1189.7 | 2 | 2.70 | 0.2878 | 558.5  | 2 15/16 | 2.99 | 2.18 | 0.73 |
| 6372-6373 | K.GTDVQAWIR.G               | 1189.7 | 2 | 2.88 | 0.3015 | 798.9  | 1 16/16 | 3.3  | 3.02 | 0.92 |
| 6399-6400 | R.CELAAAMK.R                | 1170.8 | 2 | 2.46 | 0.3923 | 892.4  | 1 14/14 | 2.87 |      | 0.00 |
| 6484-6485 | K.GTDVQAWIR.G               | 1189.7 | 2 | 2.77 | 0.3812 | 700.7  | 1 16/16 | 3.33 | 2.72 | 0.82 |
| 6519-6520 | R.CELAAAMK.R                | 1170.8 | 2 | 2.65 | 0.3824 | 865.2  | 1 14/14 | 3.24 | 2.49 | 0.77 |
| 6522-6523 | R.NLCNIPCSALLSSDITASVNCAK.K | 2763.7 | 3 | 5.70 | 0.5121 | 1818.1 | 1 37/88 | 5.49 | 6.26 | 1.14 |
| 6577-6578 | K.GTDVQAWIR.G               | 1189.7 | 2 | 3.08 | 0.2775 | 771.4  | 1 16/16 | 3.74 | 3.39 | 0.91 |
| 6582-6583 | K.FESNFNTQATNR.N            | 1572.8 | 2 | 4.89 | 0.5452 | 1674.6 | 1 21/22 | 4.62 | 3.63 | 0.79 |
| 6587-6588 | R.GYSLGNWVCAAK.F            | 1603.0 | 3 | 3.20 | 0.2957 | 942.5  | 1 22/44 | 3.09 | 2.93 | 0.95 |
| 6607-6608 | R.NLCNIPCSALLSSDITASVNCAK.K | 2763.7 | 3 | 5.13 | 0.5652 | 1980.7 | 1 36/88 | 5.04 | 4.63 | 0.92 |
| 6614-6615 | R.CELAAAMK.R                | 1170.8 | 2 | 3.08 | 0.425  | 1572   | 1 14/14 | 3.32 | 2.84 | 0.86 |
| 6652-6653 | K.GTDVQAWIR.G               | 1189.7 | 2 | 3.73 | 0.3746 | 1076.7 | 1 16/16 | 3.76 | 3.54 | 0.94 |
| 6672-6673 | R.IWWCNDGR.T                | 1126.6 | 2 | 2.11 | 0.182  | 775.9  | 1 12/12 | 2.31 | 2.25 | 0.97 |
| 6679-6680 | K.FESNFNTQATNR.N            | 1572.8 | 2 | 5.28 | 0.4879 | 2449   | 1 21/22 | 5.05 | 4.59 | 0.91 |
| 6684-6685 | R.CELAAAMK.R                | 1170.8 | 2 | 3.21 | 0.4068 | 2014   | 1 14/14 | 3.46 | 2.83 | 0.82 |
| 6727-6728 | K.GTDVQAWIR.G               | 1189.7 | 2 | 4.02 | 0.3917 | 1115.7 | 1 16/16 | 4.25 | 3.84 | 0.90 |
| 6742-6743 | K.FESNFNTQATNR.N            | 1572.8 | 2 | 5.27 | 0.5098 | 1972   | 1 21/22 | 5.04 | 4.41 | 0.88 |
| 6784-6785 | K.FESNFNTQATNR.N            | 1572.8 | 3 | 3.07 | 0.3113 | 501.3  | 2 21/44 | 2.86 | 2.98 | 1.04 |
| 6807-6808 | K.FESNFNTQATNR.N            | 1572.8 | 2 | 4.89 | 0.529  | 2334.7 | 1 21/22 | 4.78 | 4.85 | 1.01 |
