# Supplementary material
Source: PubMed Central journal article supplement (PMC3183836)
Supplement: NIHMS324680-supplement-supp_table_2.pdf [file NIHMS324680-supplement-supp_table_2.pdf]

Suppl Table 2. Database Search Results Using Alternate CID/PQD<sub>modified</sub> on Six Protein Mixture  
The right three columns indicate the Xcorr for CID, PQD<sub>modified</sub>, and their ratios, respectively

| Reference File, Scan(s)                                                        | Sequence                   | MH+    | Charge | Xcorr (merged CID/PQD) | Score    | Accession | Peptides (Hits) | Count           | Xcorr (CID) | Xcorr (PQD) | Ratio (PQD/CID) |
|--------------------------------------------------------------------------------|----------------------------|--------|--------|------------------------|----------|-----------|-----------------|-----------------|-------------|-------------|-----------------|
| gjl1351907[sp]P02769[ALBU_BOVIN Serum albumin precursor (Allergen Bos d 6) (BS |                            |        |        |                        | Delta Cn | Sp        | RSp Ions        | 159 (159 0 0 0) |             |             |                 |
| 1289-1290                                                                      | R.DTHKSEIAHR.F             | 1481.9 | 3      | 3.19                   | 0.3996   | 1019.3    | 121/36          | 2.8             | 2.8         |             | 0.00            |
| 1422-1423                                                                      | K.NYOEAQK.D                | 1040.7 | 2      | 2.43                   | 0.3396   | 585.5     | 2 10/10         | 2.46            | 2.38        |             | 0.97            |
| 1544-1545                                                                      | K.TPVSEK.V                 | 948.7  | 1      | 1.84                   | 0.2665   | 383.5     | 1 10/10         | 1.46            | 1.85        |             | 1.27            |
| 1717-1718                                                                      | K.ATEEQQLT.T               | 1106.7 | 2      | 3.12                   | 0.258    | 799.8     | 1 12/12         | 3.13            | 2.83        |             | 0.90            |
| 1727-1728                                                                      | K.ATEEQQLT.T               | 1106.7 | 1      | 2.33                   | 0.206    | 494.8     | 1 12/12         | 2.2             | 2.11        |             | 0.96            |
| 1929-1930                                                                      | K.TCVADESHAGCEK.S          | 1730.0 | 3      | 3.15                   | 0.4116   | 1005      | 1 23/48         | 2.89            | 3.6         |             | 1.25            |
| 1982-1983                                                                      | R.CCTKPESER.M              | 1432.9 | 2      | 3.04                   | 0.3728   | 433.1     | 1 13/16         | 3.04            | 2.74        |             | 0.90            |
| 2004-2005                                                                      | K.DDSPDLPK.L               | 1174.7 | 2      | 2.72                   | 0.4234   | 1267.2    | 1 14/14         | 2.73            | 2.64        |             | 0.97            |
| 2019-2020                                                                      | K.DDSPDLPK.L               | 1174.7 | 1      | 2.29                   | 0.3381   | 763       | 1 14/14         | 2.13            | 2.11        |             | 0.99            |
| 2047-2048                                                                      | K.DLQGEHFQK.G              | 1252.8 | 2      | 3.17                   | 0.4697   | 1069.9    | 1 14/14         | 3.31            | 3           |             | 0.91            |
| 2102-2103                                                                      | K.SHCJAEVEK.D              | 1349.9 | 3      | 4.54                   | 0.4163   | 2328.7    | 1 24/32         | 4.11            | 3.99        |             | 0.97            |
| 2104-2105                                                                      | K.SHCJAEVEK.D              | 1349.9 | 2      | 3.56                   | 0.4022   | 1864      | 1 16/16         | 3.97            | 3.3         |             | 0.83            |
| 2109-2110                                                                      | K.TCVADESHAGCEK.S          | 1730.0 | 3      | 4.33                   | 0.5487   | 1636.3    | 1 28/48         | 4.13            | 4.07        |             | 0.99            |
| 2117-2118                                                                      | K.TCVADESHAGCEK.S          | 1730.0 | 2      | 4.93                   | 0.5762   | 2265.4    | 1 24/24         | 5.27            | 4.75        |             | 0.90            |
| 2119-2120                                                                      | R.LSQAQFKP.A               | 1280.0 | 2      | 2.34                   | 0.2008   | 685.6     | 2 12/12         | 2.46            | 2.26        |             | 0.92            |
| 2134-2135                                                                      | K.CCAADDK.E                | 1105.8 | 2      | 2.28                   | 0.2319   | 1164.9    | 1 12/12         | 2.76            | 2.47        |             | 0.89            |
| 2169-2170                                                                      | K.QNCDQFEK.L               | 1345.8 | 2      | 3.30                   | 0.3316   | 880.7     | 1 14/14         | 3.55            | 3.02        |             | 0.85            |
| 2332-2333                                                                      | R.FKDLGEEHFQK.G            | 1682.1 | 3      | 5.29                   | 0.4051   | 2679.8    | 1 29/36         | 5.26            | 5.24        |             | 1.00            |
| 2347-2348                                                                      | R.FKDLGEEHFQK.G            | 1682.1 | 2      | 3.66                   | 0.4206   | 1364.4    | 1 17/16         | 4.1             | 3.77        |             | 0.92            |
| 2372-2373                                                                      | R.NECLFSHKI.D              | 1311.9 | 3      | 2.96                   | 0.3409   | 1261.7    | 1 18/28         | 2.99            | 2.74        |             | 0.92            |
| 2419-2420                                                                      | K.AEFVETLK.L               | 1210.8 | 2      | 3.36                   | 0.3934   | 1356      | 1 14/14         | 3.62            | 3.14        |             | 0.87            |
| 2429-2430                                                                      | K.AEFVETLK.L               | 1210.8 | 1      | 2.80                   | 0.4175   | 834.4     | 1 14/14         | 2.89            | 2.75        |             | 0.95            |
| 2444-2445                                                                      | K.QEPPERNECLFSHKDDSPDLPK.L | 2962.7 | 3      | 5.42                   | 0.574    | 1989.4    | 1 40/80         | 5.91            | 4.47        |             | 0.76            |
| 2492-2493                                                                      | K.HLVDEPNLIK.Q             | 1594.0 | 2      | 3.85                   | 0.3577   | 1692.6    | 1 18/20         | 3.93            | 3.55        |             | 0.90            |
| 2509-2510                                                                      | R.LCVLHEKT.T               | 1175.9 | 2      | 3.17                   | 0.1981   | 1301.3    | 1 12/12         | 3.17            | 2.98        |             | 0.94            |
| 2539-2540                                                                      | K.LVTDLTK.V                | 1077.8 | 2      | 2.27                   | 0.2296   | 1189.7    | 1 12/12         | 2.3             | 2.25        |             | 0.98            |
| 2544-2545                                                                      | K.LVTDLTK.V                | 1077.8 | 1      | 2.18                   | 0.3039   | 521.5     | 1 12/12         | 2.06            | 2.11        |             | 1.02            |
| 2552-2553                                                                      | R.NECLFSHKDDSPDLPK.L       | 2323.4 | 3      | 4.12                   | 0.4129   | 1537.6    | 1 31/60         | 4.29            | 3.23        |             | 0.75            |
| 2584-2585                                                                      | K.YICNDQITSSK.L            | 1721.0 | 2      | 4.52                   | 0.6181   | 2332.1    | 1 22/22         | 4.91            | 4.48        |             | 0.91            |
| 2619-2620                                                                      | K.YICNDQITSSK.L            | 1721.0 | 1      | 4.35                   | 0.6201   | 1478.1    | 1 18/22         | 3.52            | 3.02        |             | 0.86            |
| 2634-2635                                                                      | R.KVPOVSTPTLVEVSR.S        | 1928.3 | 3      | 4.42                   | 0.5483   | 1357.5    | 1 31/56         | 4.37            | 4.27        |             | 0.98            |
| 2639-2640                                                                      | K.LVTDLTK.V                | 1077.8 | 2      | 2.27                   | 0.2052   | 800       | 1 11/12         | 2.2             | 2.42        |             | 1.10            |
| 2642-2643                                                                      | R.KVPOVSTPTLVEVSR.S        | 1928.3 | 2      | 3.54                   | 0.5102   | 954.1     | 1 23/28         | 4.32            | 3.26        |             | 0.75            |
| 2647-2648                                                                      | R.RHPEYAVSVLLR.L           | 1584.0 | 2      | 3.49                   | 0.456    | 528.4     | 1 17/22         | 3.72            | 2.4         |             | 0.65            |
| 2719-2720                                                                      | K.ECCDKPILLEK.S            | 1702.2 | 3      | 3.80                   | 0.4388   | 985       | 1 23/36         | 3.53            | 3.37        |             | 0.95            |
| 2732-2733                                                                      | K.GACLLPK.I                | 1035.8 | 2      | 2.27                   | 0.2568   | 759.5     | 2 12/12         | 2.23            | 1.98        |             | 0.89            |
| 2739-2740                                                                      | K.EACFAVEGPK.L             | 1384.9 | 2      | 3.97                   | 0.4466   | 1843.1    | 1 18/18         | 4.39            | 3.91        |             | 0.89            |
| 2779-2780                                                                      | K.DDPHACYSTVFDK.L          | 1832.0 | 2      | 4.19                   | 0.568    | 1514.8    | 1 22/24         | 4.49            | 3.76        |             | 0.84            |
| 2827-2828                                                                      | K.YLVEIAR.R                | 1071.7 | 2      | 2.63                   | 0.2886   | 761.8     | 1 12/12         | 2.8             | 3.14        |             | 1.12            |
| 2854-2855                                                                      | K.DDPHACYSTVFDK.L          | 1832.0 | 3      | 3.28                   | 0.5128   | 1161.3    | 1 24/48         | 2.68            | 3.15        |             | 1.18            |
| 2879-2880                                                                      | K.LKECCDKPILLEK.S          | 2087.6 | 3      | 3.06                   | 0.1686   | 740.4     | 1 23/44         | 3.06            | 2.8         |             | 0.92            |
| 2897-2898                                                                      | K.LKECCDKPILLEK.S          | 2087.6 | 2      | 4.52                   | 0.4571   | 1226.1    | 1 19/22         | 4.67            | 3.27        |             | 0.70            |
| 2924-2925                                                                      | K.KQTALVELLK.H             | 1575.2 | 3      | 4.67                   | 0.208    | 2460.5    | 1 27/36         | 4.44            | 4.65        |             | 1.05            |
| 2929-2930                                                                      | K.KQTALVELLK.H             | 1575.2 | 2      | 3.95                   | 0.2397   | 1380.5    | 1 18/18         | 4.06            | 3.93        |             | 0.97            |
| 2939-2940                                                                      | K.VPOVSTPTLVEVSR.S         | 1656.0 | 2      | 3.75                   | 0.5309   | 819.7     | 1 20/26         | 3.64            | 3.24        |             | 0.89            |
| 2984-2985                                                                      | R.ETYGDMDACCEK.Q           | 1745.0 | 2      | 4.92                   | 0.62     | 2281.9    | 1 22/22         | 5.83            | 4.4         |             | 0.75            |
| 2997-2998                                                                      | R.RPCFSALTPDETYVPK.A       | 2158.3 | 2      | 4.08                   | 0.2393   | 532.3     | 2 19/30         | 4.23            | 2.6         |             | 0.61            |
| 3007-3008                                                                      | R.ETYGDMDACCEK.Q           | 1745.0 | 3      | 3.45                   | 0.383    | 1506.8    | 1 24/44         | 3.53            | 3.22        |             | 0.91            |
| 3009-3010                                                                      | R.ETYGDMDACCEK.Q           | 1745.0 | 2      | 4.66                   | 0.6205   | 2366      | 1 22/22         | 4.72            | 4.57        |             | 0.97            |
| 3027-3028                                                                      | R.RPCFSALTPDETYVPK.A       | 2158.3 | 3      | 5.62                   | 0.1855   | 1794.7    | 1 31/60         | 5.24            | 5.51        |             | 1.05            |
| 3092-3093                                                                      | K.DDPHACYSTVFDK.L          | 2217.4 | 3      | 4.79                   | 0.5398   | 1297.9    | 1 33/56         | 5.08            | 5.04        |             | 0.99            |
| 3097-3098                                                                      | K.LKPDNPNTLDFEKADEK.K      | 2585.7 | 3      | 4.39                   | 0.4346   | 928.8     | 1 28/64         | 4.41            | 3.99        |             | 0.90            |
| 3119-3120                                                                      | K.ECCHGDLLECCADDR.A        | 1861.0 | 3      | 5.13                   | 0.4806   | 1443.6    | 1 28/52         | 4.76            | 4.86        |             | 1.02            |
| 3132-3133                                                                      | K.LVNLTEFAK.T              | 1452.0 | 2      | 2.99                   | 0.2984   | 1788.8    | 1 18/18         | 3.02            | 2.67        |             | 0.88            |
| 3134-3135                                                                      | K.ECCHGDLLECCADDR.A        | 1861.0 | 2      | 5.44                   | 0.5771   | 2584.3    | 1 26/26         | 5.22            | 4.57        |             | 0.88            |
| 3214-3215                                                                      | K.LKPDNPNTLDFEKADEK.K      | 1998.3 | 2      | 3.54                   | 0.4938   | 725.2     | 1 18/24         | 4.17            | 2.67        |             | 0.64            |
| 3229-3230                                                                      | K.YICNDQITSSK.L            | 1721.0 | 2      | 2.31                   | 0.3919   | 196.2     | 2 11/22         | 2.36            | 1.75        |             | 0.74            |
| 3272-3273                                                                      | K.SLHTLFGDELCK.V           | 1697.1 | 3      | 5.48                   | 0.5545   | 2681.8    | 1 30/44         | 5.13            | 4.79        |             | 0.93            |
| 3274-3275                                                                      | K.QTALVELLK.H              | 1302.9 | 2      | 3.71                   | 0.2793   | 1899.1    | 1 16/16         | 3.61            | 4.09        |             | 1.13            |
| 3277-3278                                                                      | K.QTALVELLK.H              | 1302.9 | 3      | 3.28                   | 0.0979   | 1029.6    | 1 20/32         | 2.44            | 3.1         |             | 1.27            |
| 3282-3283                                                                      | K.LVNLTEFAK.T              | 1452.0 | 2      | 4.19                   | 0.4934   | 2061      | 1 18/18         | 4.5             | 4.12        |             | 0.92            |
| 3287-3288                                                                      | K.SLHTLFGDELCK.V           | 1697.1 | 2      | 4.93                   | 0.583    | 1927      | 1 20/22         | 4.65            | 4.61        |             | 0.99            |
| 3289-3290                                                                      | K.LVNLTEFAK.T              | 1452.0 | 3      | 4.20                   | 0.2902   | 1576.1    | 1 22/36         | 3.96            | 2.89        |             | 0.73            |
| 3314-3315                                                                      | K.LVNLTEFAK.T              | 1452.0 | 1      | 3.67                   | 0.5058   | 1424.8    | 1 17/18         | 2.97            | 3.69        |             | 1.24            |
| 3382-3383                                                                      | K.EYEATLECCAK.D            | 1769.1 | 3      | 4.11                   | 0.4736   | 1532.9    | 1 26/44         | 3.85            | 4.08        |             | 1.06            |
| 3387-3388                                                                      | K.EYEATLECCAK.D            | 1769.1 | 2      | 5.36                   | 0.5116   | 2483.3    | 1 22/22         | 5.71            | 4.81        |             | 0.84            |
| 3427-3428                                                                      | K.YNGVFECCQAEQK.G          | 2014.2 | 2      | 4.91                   | 0.5194   | 2077.8    | 1 26/26         | 5.33            | 4.04        |             | 0.76            |
| 3434-3435                                                                      | K.LVNLTEFAK.T              | 1452.0 | 2      | 3.59                   | 0.4503   | 1538.3    | 1 17/18         | 3.41            | 2.63        |             | 0.77            |
| 3439-3440                                                                      | K.DAIPENLPPLTADFAEDKDVCK.N | 2879.7 | 2      | 5.56                   | 0.7082   | 1332.4    | 1 27/42         | 5.23            | 4.79        |             | 0.92            |
| 3617-3618                                                                      | K.LFTFHADICTLPDTEK.Q       | 2185.3 | 3      | 5.59                   | 0.4172   | 1327.8    | 1 32/60         | 5.07            | 5.19        |             | 1.02            |
| 3622-3623                                                                      | K.LFTFHADICTLPDTEK.Q       | 2185.3 | 2      | 5.94                   | 0.6179   | 2491.4    | 1 26/30         | 5.25            | 5.5         |             | 1.05            |
| 3697-3698                                                                      | K.TVMENFVAFVK.D            | 1688.0 | 2      | 5.65                   | 0.5736   | 3206.8    | 1 22/22         | 5.78            | 5.53        |             | 0.96            |
| 3717-3718                                                                      | K.TVMENFVAFVK.D            | 1688.0 | 2      | 5.22                   | 0.5836   | 3766.8    | 1 22/22         | 5.19            | 5.06        |             | 0.97            |
| 3732-3733                                                                      | K.DAFLGSLFYEYSR.R          | 1711.9 | 3      | 4.14                   | 0.4242   | 1413.7    | 1 29/48         | 3.93            | 3.77        |             | 0.96            |
| 3737-3738                                                                      | K.DAFLGSLFYEYSR.R          | 1711.9 | 2      | 4.90                   | 0.6249   | 2229      | 1 24/24         | 5.19            | 4.41        |             | 0.85            |
| 3749-3750                                                                      | K.DAFLGSLFYEYSR.R          | 1711.9 | 2      | 4.32                   | 0.651    | 2219.2    | 1 24/24         | 4.38            | 4.46        |             | 1.02            |
| 3852-3853                                                                      | K.TVMENFVAFVK.D            | 1688.0 | 2      | 5.40                   | 0.6063   | 3747      | 1 22/22         | 5.53            | 4.66        |             | 0.84            |
| 3869-3870                                                                      | K.DAFLGSLFYEYSR.R          | 1711.9 | 2      | 4.51                   | 0.6631   | 2069.1    | 1 23/24         | 4.56            | 4.02        |             | 0.88            |
| 3982-3983                                                                      | R.MPCTEDYLSLNR.L           | 1858.1 | 3      | 4.10                   | 0.39     | 1421.7    | 1 26/52         | 3.35            | 3.49        |             | 1.04            |
| 3984-3985                                                                      | R.MPCTEDYLSLNR.L           | 1858.1 | 2      | 4.67                   | 0.5815   | 1607.3    | 1 25/26         | 4.8             | 4.91        |             | 1.02            |
| 4087-4088                                                                      | K.LFTFHADICTLPDTEK.Q       | 2185.3 | 2      | 4.51                   | 0.56     | 946.1     | 1 17/30         | 4.47            | 3.12        |             | 0.70            |
| 4114-4115                                                                      | R.MPCTEDYLSLNR.L           | 1858.1 | 2      | 5.27                   | 0.6002   | 1415.1    | 1 24/26         | 5.43            | 4.19        |             | 0.77            |
| 4259-4260                                                                      | K.GLVLAFSQYLQCCPFDEHVK.L   | 2769.7 | 2      | 5.11                   | 0.6226   | 1044.9    | 1 19/40         | 5               | 4.71        |             | 0.94            |
| 4337-4338                                                                      | R.MPCTEDYLSLNR.L           | 1858.1 | 2      | 2.41                   | 0.2966   | 503       | 1 16/26         | 2.34            | 2.13        |             | 0.91            |
| 4424-4425                                                                      | K.DDPHACYSTVFDK.L          | 1832.0 | 3      | 2.60                   | 0.2981   | 822.6     | 1 23/48         | 1.6             | 2.63        |             | 1.64            |
| 4432-4433                                                                      | K.ECCHGDLLECCADDR.A        | 1861.0 | 3      | 4.34                   | 0.3357   | 1155.2    | 1 26/52         | 4.09            | 3.94        |             | 0.96            |
| 4442-4443                                                                      | R.MPCTEDYLSLNR.L           | 1858.1 | 2      | 3.20                   | 0.5287   | 1031.2    | 1 20/26         | 3.21            | 2.7         |             | 0.84            |
| 4457-4458                                                                      | R.KVPOVSTPTLVEVSR.S        | 1928.3 | 3      | 4.18                   | 0.5318   | 1111.9    | 1 28/56         | 4.25            | 3.84        |             | 0.90            |
| 4539-4540                                                                      | K.YLVEIAR.R                | 1071.7 | 2      | 2.45                   | 0.3238   | 552.6     | 1 12/12         | 2.4             | 2.1         |             | 0.88            |
| 4559-4560                                                                      | K.DDPHACYSTVFDK.L          | 1832.0 | 3      | 2.88                   | 0.3182   | 602.6     | 1 20/48         | 2.15            | 2.52        |             | 1.17            |
| 4567-4568                                                                      | R.MPCTEDYLSLNR.L           | 1858.1 | 2      | 3.40                   | 0.581    | 695.2     | 1 17/26         | 3.45            | 2.94        |             | 0.85            |
| 4584-4585                                                                      | K.TVMENFVAFVK.D            | 1688.0 | 2      | 2.22                   | 0.156    | 320.1     | 3 13/22         | 3.21            | 1.73        |             | 0.54            |
| 4599-4600                                                                      | R.KVPOVSTPTLVEVSR.S        | 1928.3 | 3      | 4.23                   | 0.5267   | 1161.3    | 1 28/56         | 4.21            | 2.17        |             | 0.52            |
| 4667-4668                                                                      | K.DDPHACYSTVFDK.L          | 1832.0 | 3      | 2.61                   | 0.2162   | 860.7     | 1 24/48         | 2.32            | 2.63        |             | 1.13            |
| 4679-4680                                                                      | K.QTALVELLK.H              | 1575.2 | 3      | 2.84                   | 0.1291   | 1354      | 1 24/36         | 2.39            | 3.25        |             | 1.36            |
| 4687-4688                                                                      | K.TCVADESHAGCEK.S          | 1730.0 | 3      | 2.85                   | 0.3989   | 213.7     | 3 22/48         | 2.92            | 2.01        |             | 0.69            |
| 4694-4695                                                                      | R.MPCTEDYLSLNR.L           | 1858.1 | 2      | 3.64                   | 0.571    | 904.9     | 1 19/26         | 3.65            | 3.16        |             | 0.87            |
| 4747-4748                                                                      | R.KVPOVSTPTLVEVSR.S        | 1928.3 | 3      | 4.29                   | 0.5252   | 1065.2    | 1 27/56         | 4.21            | 4.03        |             | 0.96            |
| 4757-4758                                                                      | R.RPCFSALTPDETYVPK.A       |        |        |                        |          |           |                 |                 |             |             |                 |

|           |                      |        |   |      |        |        |    |       |      |      |      |
|-----------|----------------------|--------|---|------|--------|--------|----|-------|------|------|------|
| 4924-4925 | K.LFTFHADICTLPDTEK.Q | 2185.3 | 2 | 4.14 | 0.4455 | 1509.1 | 1  | 33/60 | 3.03 | 4.24 | 1.40 |
| 4932-4933 | R.MPCTEDYLSLNR.L     | 1858.1 | 3 | 3.43 | 0.4892 | 820.2  | 1  | 18/26 | 3.25 | 3.15 | 0.97 |
| 4987-4988 | K.LVNLTEFAK.T        | 1452.0 | 2 | 3.64 | 0.5248 | 2003.3 | 1  | 18/18 | 3.78 | 3.74 | 0.99 |
| 5014-5015 | K.DDPHACYSTVFDK.L    | 1832.0 | 3 | 2.60 | 0.2147 | 679.1  | 1  | 21/48 | 2.16 | 2.29 | 1.06 |
| 5017-5018 | K.ECCHGDLLLECADDR.A  | 1861.0 | 3 | 3.82 | 0.387  | 587.2  | 1  | 25/52 | 4.67 | 2.2  | 0.47 |
| 5027-5028 | K.KQTALVELLK.H       | 1575.2 | 3 | 2.83 | 0.1902 | 1068.1 | 1  | 22/36 | 2.69 | 2.75 | 1.02 |
| 5037-5038 | R.KVPOVSTPTLVEVSR.S  | 1928.3 | 3 | 4.37 | 0.5066 | 1082.8 | 1  | 28/56 | 4.35 | 3.59 | 0.83 |
| 5059-5060 | K.CCTESLVNR.R        | 1268.0 | 2 | 2.17 | 0.2845 | 303.5  | 10 | 14/16 | 2.56 | 1.22 | 0.48 |
| 5102-5103 | R.MPCTEDYLSLNR.L     | 1858.1 | 2 | 2.69 | 0.3753 | 778.7  | 1  | 17/26 | 2.52 | 2.59 | 1.03 |
| 5104-5105 | K.LVNLTEFAK.T        | 1452.0 | 2 | 3.86 | 0.5379 | 1448.9 | 1  | 18/18 | 3.92 | 3.57 | 0.91 |
| 5132-5133 | K.KQTALVELLK.H       | 1575.2 | 3 | 3.30 | 0.1176 | 1426.7 | 1  | 23/36 | 3.28 | 2.82 | 0.86 |
| 5142-5143 | R.KVPOVSTPTLVEVSR.S  | 1928.3 | 3 | 4.17 | 0.4833 | 892.2  | 1  | 26/56 | 4.16 | 3.87 | 0.93 |
| 5194-5195 | K.ECCHGDLLLECADDR.A  | 1861.0 | 3 | 4.53 | 0.3937 | 1551.3 | 1  | 26/52 | 4.32 | 3.86 | 0.89 |
| 5207-5208 | R.MPCTEDYLSLNR.L     | 1858.1 | 2 | 2.08 | 0.1985 | 388.8  | 2  | 14/26 | 1.88 | 1.85 | 0.98 |
| 5222-5223 | K.LFTFHADICTLPDTEK.Q | 2185.3 | 3 | 4.09 | 0.3692 | 1192.4 | 1  | 30/60 | 4.38 | 2.78 | 0.63 |
| 5254-5255 | R.KVPOVSTPTLVEVSR.S  | 1928.3 | 3 | 4.42 | 0.4879 | 985.7  | 1  | 27/56 | 4.2  | 3.66 | 0.87 |
| 5257-5258 | K.KQTALVELLK.H       | 1575.2 | 3 | 3.27 | 0.1308 | 983.6  | 1  | 21/36 | 2.64 | 3.56 | 1.35 |
| 5289-5290 | K.YLVEIAR.R          | 1071.7 | 2 | 2.09 | 0.3076 | 840.6  | 1  | 12/12 | 1.99 | 2.09 | 1.05 |
| 5294-5295 | K.ECCHGDLLLECADDR.A  | 1861.0 | 3 | 4.32 | 0.4006 | 1446.2 | 1  | 25/52 | 4.29 | 4.04 | 0.94 |
| 5312-5313 | R.MPCTEDYLSLNR.L     | 1858.1 | 2 | 3.05 | 0.5167 | 778.3  | 1  | 20/26 | 3.21 | 2.52 | 0.79 |
| 5349-5350 | K.LFTFHADICTLPDTEK.Q | 2185.3 | 3 | 3.84 | 0.3884 | 1366.5 | 1  | 30/60 | 3.78 | 3.92 | 1.04 |
| 5357-5358 | R.KVPOVSTPTLVEVSR.S  | 1928.3 | 3 | 3.79 | 0.4877 | 1045.1 | 1  | 28/56 | 4.07 | 3.69 | 0.91 |
| 5359-5360 | K.KQTALVELLK.H       | 1575.2 | 3 | 2.86 | 0.2127 | 1014.9 | 1  | 23/36 | 2.84 | 3.26 | 1.15 |
| 5414-5415 | K.LVNLTEFAK.T        | 1452.0 | 2 | 2.99 | 0.3905 | 540.9  | 1  | 17/18 | 3.53 | 2.86 | 0.81 |
| 5449-5450 | K.LFTFHADICTLPDTEK.Q | 2185.3 | 3 | 2.71 | 0.1962 | 301.2  | 2  | 21/60 | 2.41 | 2.78 | 1.15 |
| 5489-5490 | R.KVPOVSTPTLVEVSR.S  | 1928.3 | 3 | 4.66 | 0.4672 | 1072.5 | 1  | 28/56 | 4.73 | 3.82 | 0.81 |
| 5514-5515 | K.AEFVETK.L          | 1210.8 | 2 | 3.13 | 0.3763 | 1366.7 | 1  | 14/14 | 3.22 | 3.13 | 0.97 |
| 5604-5605 | K.KQTALVELLK.H       | 1575.2 | 3 | 2.63 | 0.1026 | 497.4  | 2  | 20/36 | 2.69 | 2.54 | 0.94 |
| 5634-5635 | R.RPCFSALTPDEYVPK.A  | 2158.3 | 3 | 3.15 | 0.3403 | 432.6  | 1  | 27/60 | 3.71 | 2.36 | 0.64 |
| 5639-5640 | K.AEFVETK.L          | 1210.8 | 2 | 3.22 | 0.4174 | 1209.5 | 1  | 14/14 | 3.26 | 3.03 | 0.93 |
| 5694-5695 | K.ECCHGDLLLECADDR.A  | 1861.0 | 3 | 3.21 | 0.2424 | 295.5  | 2  | 20/52 | 2.28 | 2.94 | 1.29 |
| 5697-5698 | K.TCVADESHAGCEK.S    | 1730.0 | 3 | 2.66 | 0.421  | 230.1  | 1  | 20/48 | 2.6  | 2.74 | 1.05 |
| 5702-5703 | R.KVPOVSTPTLVEVSR.S  | 1928.3 | 3 | 4.19 | 0.5437 | 1159.7 | 1  | 29/56 | 4.05 | 4.07 | 1.00 |
| 5732-5733 | K.CCTESLVNR.R        | 1268.0 | 2 | 2.48 | 0.4502 | 529.2  | 1  | 14/16 | 2.45 | 2.73 | 1.11 |
| 5804-5805 | K.LVNLTEFAK.T        | 1452.0 | 2 | 3.00 | 0.4462 | 449.1  | 1  | 17/18 | 3.38 | 2.85 | 0.84 |
| 5822-5823 | K.LKPDPTLCEDEK.A     | 1998.3 | 3 | 3.24 | 0.4502 | 737.9  | 1  | 22/48 | 3.54 | 3.00 | 0.80 |
| 5892-5893 | K.AEFVETK.L          | 1210.8 | 2 | 2.95 | 0.4345 | 1449.7 | 1  | 14/14 | 3.08 | 2.73 | 0.89 |
| 5919-5920 | R.KVPOVSTPTLVEVSR.S  | 1928.3 | 3 | 4.18 | 0.5817 | 957.7  | 1  | 26/56 | 3.98 | 3.63 | 0.91 |
| 5964-5965 | K.LVNLTEFAK.T        | 1452.0 | 2 | 2.07 | 0.3236 | 139.6  | 8  | 15/18 | 2.49 | 1.46 | 0.59 |
| 6034-6035 | K.AEFVETK.L          | 1210.8 | 2 | 2.83 | 0.4296 | 428.9  | 2  | 13/14 | 2.97 | 2.4  | 0.81 |
| 6079-6080 | R.KVPOVSTPTLVEVSR.S  | 1928.3 | 3 | 3.53 | 0.4735 | 1191.7 | 1  | 30/56 | 4.25 | 3.62 | 0.85 |
| 6109-6110 | K.LVNLTEFAK.T        | 1452.0 | 2 | 2.62 | 0.527  | 181.8  | 4  | 16/18 | 3.23 | 3.00 | 0.90 |
| 6544-6545 | R.RPCFSALTPDEYVPK.A  | 2158.3 | 3 | 4.61 | 0.2528 | 1641.3 | 1  | 31/60 | 4.61 | 4.5  | 0.98 |
| 6564-6565 | K.KQTALVELLK.H       | 1575.2 | 3 | 2.94 | 0.137  | 1551.3 | 1  | 24/36 | 3.01 | 3.01 | 1.00 |
| 6602-6603 | R.LCVLHEK.T          | 1175.9 | 3 | 2.57 | 0.0836 | 525.8  | 6  | 13/24 | 2.55 | 2.01 | 0.79 |
| 6607-6608 | K.TCVADESHAGCEK.S    | 1730.0 | 3 | 3.14 | 0.4303 | 1126.5 | 1  | 23/48 | 3.3  | 3.00 | 0.90 |
| 6672-6673 | R.KVPOVSTPTLVEVSR.S  | 1928.3 | 3 | 4.63 | 0.5092 | 1331.7 | 1  | 30/56 | 4.47 | 4.04 | 0.90 |
| 6684-6685 | K.TCVADESHAGCEK.S    | 1730.0 | 3 | 3.99 | 0.5314 | 1182.8 | 1  | 24/48 | 3.51 | 3.89 | 1.11 |
| 6749-6750 | K.ATEEQK.T           | 1106.7 | 2 | 3.03 | 0.2489 | 956.6  | 1  | 12/12 | 3.03 | 2.98 | 0.98 |
| 6784-6785 | K.AFDEK.L            | 897.6  | 2 | 2.25 | 0.2265 | 589.7  | 4  | 8/8   | 2.05 | 2.14 | 1.04 |
| 6822-6823 | K.ATEEQK.T           | 1106.7 | 2 | 3.12 | 0.2011 | 965.9  | 1  | 12/12 | 3.07 | 3.07 | 1.00 |
| 6849-6850 | K.AFDEK.L            | 897.6  | 2 | 2.06 | 0.1713 | 594.8  | 5  | 8/8   | 2.05 | 1.85 | 0.90 |

| Reference File, Scan(s)                                                | Sequence                | MH+    | Charge | Xcorr (merged CID/PQD) | Score Delta Cn | Accession Sp | Peptides (Hits) RSp | Count | Xcorr (CID) | Xcorr (PQD) | Ratio (PQD/CID) |
|------------------------------------------------------------------------|-------------------------|--------|--------|------------------------|----------------|--------------|---------------------|-------|-------------|-------------|-----------------|
| gjl136191 sp P02787 TRFE_HUMAN Serotransferrin precursor (Transferrin) |                         |        |        |                        |                |              | 120 (120 0 0 0)     |       |             |             |                 |
| 1279-1280                                                              | K.HQTVPQNTGGK.N         | 1454.9 | 3      | 2.68                   | 0.276          | 428.7        | 2                   | 17/40 | 2.32        |             | 0.00            |
| 1362-1363                                                              | K.HQTVPQNTGGK.N         | 1454.9 | 2      | 2.91                   | 0.5786         | 547.6        | 1                   | 16/20 | 2.86        | 3.28        | 1.15            |
| 1372-1373                                                              | K.HQTVPQNTGGK.N         | 1454.9 | 3      | 3.81                   | 0.3905         | 886.1        | 1                   | 22/40 | 3.63        | 3.56        | 0.98            |
| 1462-1463                                                              | R.APNHAVVTR.K           | 1108.7 | 2      | 2.78                   | 0.4795         | 580.4        | 1                   | 14/16 | 2.88        | 2.76        | 1.03            |
| 1497-1498                                                              | K.HQTVPQNTGGK.N         | 1454.9 | 3      | 4.17                   | 0.4753         | 1025.6       | 1                   | 23/40 | 4.09        | 3.39        | 0.83            |
| 1509-1510                                                              | K.LHQRNTYK.Y            | 1463.9 | 3      | 2.63                   | 0.2805         | 578.4        | 1                   | 17/32 | 2.69        | 2.33        | 0.87            |
| 1517-1518                                                              | R.APNHAVVTR.K           | 1108.7 | 3      | 3.34                   | 0.3617         | 845.9        | 2                   | 19/32 | 3.19        | 2.57        | 0.81            |
| 1587-1588                                                              | R.KDKEACVHK.I           | 1680.3 | 3      | 3.51                   | 0.3222         | 1097.1       | 1                   | 23/32 | 4           | 3.07        | 0.77            |
| 1692-1693                                                              | K.EACVHK.I              | 1020.7 | 2      | 2.05                   | 0.2364         | 675.8        | 1                   | 10/10 | 2.05        | 2.23        | 1.10            |
| 1707-1708                                                              | K.DKEACVHK.I            | 1408.0 | 2      | 3.00                   | 0.3551         | 615.7        | 1                   | 13/14 | 3.02        | 2.64        | 0.87            |
| 1712-1713                                                              | R.KPVDYK.D              | 1310.9 | 3      | 3.31                   | 0.285          | 959          | 1                   | 18/24 | 3.35        | 3.08        | 0.92            |
| 1714-1715                                                              | R.KPVDYK.D              | 1310.9 | 2      | 2.64                   | 0.309          | 744.2        | 1                   | 11/12 | 2.81        | 2.33        | 0.83            |
| 2024-2025                                                              | K.DSAHGFLLK.V           | 1162.8 | 2      | 3.15                   | 0.5022         | 1297.2       | 1                   | 14/14 | 3.21        | 2.61        | 0.81            |
| 2074-2075                                                              | K.QCSFR.D               | 830.5  | 1      | 1.64                   | 0.2468         | 156.3        | 8/8                 |       | 1.45        | 1.35        | 0.93            |
| 2237-2238                                                              | K.GDVAFK.H              | 1023.7 | 2      | 2.84                   | 0.2981         | 1254.9       | 1                   | 12/12 | 2.95        | 3.07        | 1.04            |
| 2289-2290                                                              | K.NPDPWAK.N             | 1115.7 | 2      | 2.10                   | 0.2418         | 575.2        | 1                   | 11/12 | 1.87        | 2.08        | 1.11            |
| 2314-2315                                                              | K.WCALSHHER.L           | 1328.8 | 3      | 3.74                   | 0.4179         | 1802.6       | 1                   | 22/32 | 3.41        | 3.12        | 0.91            |
| 2334-2335                                                              | K.DCHLAQVPSHTVVAR.S     | 1823.1 | 2      | 5.83                   | 0.5495         | 1913.7       | 1                   | 26/28 | 5.32        | 4.22        | 0.79            |
| 2359-2360                                                              | R.KPVEEYANCLHAR.A       | 1864.2 | 2      | 4.73                   | 0.6293         | 1055.7       | 1                   | 21/24 | 4.97        | 3.54        | 0.71            |
| 2362-2363                                                              | K.DGAGDVAFK.H           | 1266.8 | 2      | 3.86                   | 0.5242         | 1961         | 1                   | 18/18 | 3.75        | 4.01        | 1.07            |
| 2452-2453                                                              | R.DDTVCLAK.L            | 1198.8 | 2      | 3.31                   | 0.4097         | 1321.8       | 1                   | 14/14 | 3.39        | 3.54        | 1.04            |
| 2459-2460                                                              | R.WCAVSEHATK.C          | 1595.0 | 2      | 4.63                   | 0.5496         | 1831.1       | 1                   | 20/20 | 4.95        | 4.44        | 0.90            |
| 2462-2463                                                              | R.WCAVSEHATK.C          | 1595.0 | 3      | 3.91                   | 0.5249         | 1330.6       | 1                   | 23/40 | 3.68        | 3.84        | 1.04            |
| 2467-2468                                                              | K.DSGFOMQLR.G           | 1339.7 | 2      | 4.21                   | 0.484          | 1389.4       | 1                   | 18/18 | 4.13        | 3.95        | 0.96            |
| 2469-2470                                                              | R.DDTVCLAK.L            | 1198.8 | 1      | 2.90                   | 0.4093         | 874.7        | 1                   | 14/14 | 2.78        | 2.65        | 0.95            |
| 2479-2480                                                              | K.YLGEYVK.A             | 1288.8 | 2      | 3.10                   | 0.429          | 1311.8       | 1                   | 14/14 | 3.41        | 3.12        | 0.91            |
| 2512-2513                                                              | R.EGTQPEAPTDECKPKV.W    | 2228.4 | 2      | 5.11                   | 0.5965         | 1061.3       | 1                   | 22/30 | 5.73        | 3.92        | 0.68            |
| 2594-2595                                                              | K.HSTIFENLANK.A         | 1562.0 | 2      | 4.54                   | 0.567          | 2123.4       | 1                   | 20/20 | 4.84        | 4.32        | 0.89            |
| 2607-2608                                                              | K.HSTIFENLANK.A         | 1562.0 | 3      | 3.79                   | 0.31           | 1061         | 1                   | 22/40 | 3.5         | 3.58        | 1.02            |
| 2609-2610                                                              | K.EGYGYTGAFR.C          | 1427.7 | 2      | 3.88                   | 0.5355         | 1689.3       | 1                   | 20/20 | 3.9         | 3.33        | 0.85            |
| 2699-2700                                                              | K.KASYLDQIR.A           | 1403.0 | 3      | 3.72                   | 0.5235         | 1339.2       | 1                   | 20/32 | 3.94        | 3.41        | 0.89            |
| 2727-2728                                                              | K.CDEWVSNVGVK.I         | 1557.9 | 2      | 5.16                   | 0.5634         | 2817.1       | 1                   | 20/20 | 4.79        | 4.77        | 1.00            |
| 2729-2730                                                              | K.EFOLFSSPHGK.D         | 1565.0 | 2      | 4.61                   | 0.4255         | 1699.6       | 1                   | 20/20 | 4.98        | 3.89        | 0.78            |
| 2772-2773                                                              | K.EFOLFSSPHGK.D         | 1565.0 | 3      | 4.21                   | 0.4173         | 1660.9       | 1                   | 28/40 | 4.09        | 3.97        | 0.97            |
| 2822-2823                                                              | K.SASDLTWDNLK.G         | 1537.9 | 2      | 4.97                   | 0.4285         | 2008.1       | 1                   | 20/20 | 5.02        | 4.76        | 0.95            |
| 2837-2838                                                              | K.SASDLTWDNLK.G         | 1537.9 | 3      | 3.59                   | 0.2074         | 1434.1       | 1                   | 24/40 | 2.68        | 2.94        | 1.10            |
| 2882-2883                                                              | K.SVSPDGPVACVK.K        | 1693.1 | 2      | 3.78                   | 0.4704         | 1118.2       | 1                   | 23/26 | 4.12        | 3.75        | 0.91            |
| 2884-2885                                                              | K.SVSPDGPVACVK.K        | 1693.1 | 3      | 4.21                   | 0.56           | 1391.4       | 1                   | 28/52 | 3.73        | 3.9         | 1.05            |
| 3102-3103                                                              | K.ADRDQYELLCLDNTR.K     | 2015.1 | 3      | 5.34                   | 0.2706         | 1716.8       | 1                   | 31/56 | 5.27        | 5.14        | 0.98            |
| 3112-3113                                                              | K.ADRDQYELLCLDNTR.K     | 2015.1 | 2      | 4.49                   | 0.5079         | 936.6        | 1                   | 23/28 | 5.04        | 2.52        | 0.50            |
| 3164-3165                                                              | K.EGYGYTGAFR.C          | 1427.7 | 2      | 2.39                   | 0.2899         | 474.8        | 1                   | 11/20 | 2.07        | 1.91        | 0.92            |
| 3167-3168                                                              | K.IECVSAETTEDCIAK.I     | 1992.2 | 3      | 4.28                   | 0.4864         | 1315         | 1                   | 29/56 | 3.97        | 4.29        | 1.08            |
| 3169-3170                                                              | K.IECVSAETTEDCIAK.I     | 1992.2 | 2      | 6.21                   | 0.593          | 2985.2       | 1                   | 27/28 | 6.27        | 5.37        | 0.86            |
| 3192-3193                                                              | K.NLNEKDYELLCLDGTGR.K   | 2230.3 | 3      | 5.11                   | 0.5375         | 1926.9       | 1                   | 33/60 | 5.15        | 4.56        | 0.89            |
| 3202-3203                                                              | K.NLNEKDYELLCLDGTGR.K   | 2230.3 | 2      | 5.62                   | 0.5495         | 1173.3       | 1                   | 24/30 | 5.85        | 4.11        | 0.70            |
| 3232-3233                                                              | K.ADRDQYELLCLDNTR.K     | 2015.1 | 3      | 4.24                   | 0.2553         | 1167         | 1                   | 26/56 | 3.86        | 4.3         | 1.11            |
| 3257-3258                                                              | K.SDNCDTEPEAGVFAVAVVK.K | 2349.3 | 3      | 5.90                   | 0.6268         | 2248.6       | 1                   | 33/72 | 5.03        |             |                 |

|           |                               |        |   |      |        |        |          |      |      |      |
|-----------|-------------------------------|--------|---|------|--------|--------|----------|------|------|------|
| 3599-3600 | K.DYELLCLDGT.R                | 1487.9 | 2 | 2.51 | 0.2834 | 516.8  | 1 15/20  | 2.55 | 2.59 | 1.02 |
| 3599-3600 | K.NLNEKDYELLCLDGT.R           | 2230.3 | 3 | 3.27 | 0.2274 | 575.9  | 1 24/60  | 2.6  | 3.65 | 1.40 |
| 3604-3605 | R.TAGWNIPMGLLYNK.I            | 1866.1 | 3 | 4.59 | 0.4747 | 1116.2 | 1 26/52  | 4.39 | 3.28 | 0.75 |
| 3612-3613 | R.TAGWNIPMGLLYNK.I            | 1866.1 | 2 | 5.02 | 0.447  | 1542.1 | 1 25/26  | 5.04 | 4.48 | 0.89 |
| 3662-3663 | K.MNNGEADAMSLDGGFVYIAGK.C     | 2447.3 | 3 | 4.33 | 0.3417 | 1096.4 | 1 27/80  | 4.1  | 4.57 | 1.11 |
| 3672-3673 | K.LCMGSGLNLCENPNKKEGYGTGAFR.C | 3237.8 | 3 | 7.10 | 0.552  | 1909.6 | 1 39/100 | 6.45 | 6.83 | 1.06 |
| 3824-3825 | K.CSTSSLLLEACTFR.R            | 1654.0 | 2 | 5.06 | 0.7166 | 2537.5 | 1 24/24  | 4.95 | 4.71 | 0.95 |
| 3964-3965 | K.CSTSSLLLEACTFR.R            | 1654.0 | 2 | 4.04 | 0.66   | 1956.9 | 1 21/24  | 4.33 | 3.89 | 0.90 |
| 4157-4158 | K.DYELLCLDGT.R                | 1487.9 | 2 | 2.24 | 0.2691 | 521.2  | 1 15/20  | 2.25 | 2.22 | 0.99 |
| 4162-4163 | R.SAGWNIPGICYDLPEPR.K         | 2304.3 | 2 | 3.83 | 0.4976 | 857.5  | 1 18/36  | 2.76 | 3.66 | 1.33 |
| 4294-4295 | K.EFOLSSPHG.D                 | 1565.0 | 3 | 2.68 | 0.2575 | 1029.6 | 1 23/40  | 2.83 | 2.15 | 0.00 |
| 4492-4493 | K.DGAGDVA.FVK.H               | 1266.8 | 2 | 2.82 | 0.4164 | 1620.4 | 1 17/18  | 2.82 | 2.64 | 0.94 |
| 4499-4500 | R.WCAVSEHEATK.C               | 1595.0 | 3 | 2.77 | 0.246  | 1287.4 | 1 22/40  | 2.57 | 3.06 | 1.19 |
| 4514-4515 | R.TAGWNIPMGLLYNK.I            | 1866.1 | 3 | 3.50 | 0.2283 | 576.4  | 2 21/52  | 3.55 | 3.09 | 0.87 |
| 4542-4543 | K.SASDLTWDNLK.G               | 1537.9 | 2 | 2.32 | 0.1573 | 704.3  | 2 16/20  | 2.21 | 2.81 | 1.27 |
| 4629-4630 | R.TAGWNIPMGLLYNK.I            | 1866.1 | 3 | 3.31 | 0.2236 | 431    | 6 19/52  | 3.39 | 3.32 | 0.98 |
| 4709-4710 | R.WCAVSEHEATK.C               | 1595.0 | 3 | 2.75 | 0.288  | 1333   | 1 21/40  | 2.53 | 2.94 | 1.16 |
| 4714-4715 | K.SASDLTWDNLK.G               | 1537.9 | 2 | 3.16 | 0.3406 | 1375.9 | 2 16/20  | 3.42 | 3.11 | 0.91 |
| 4769-4770 | K.DGAGDVA.FVK.H               | 1266.8 | 2 | 2.47 | 0.3565 | 1328.8 | 1 16/18  | 2.65 | 2.56 | 0.97 |
| 4819-4820 | R.WCAVSEHEATK.C               | 1595.0 | 3 | 2.53 | 0.2099 | 1132.7 | 2 21/40  | 2.6  | 3.02 | 1.16 |
| 4862-4863 | K.DYELLCLDGT.R                | 1487.9 | 2 | 2.07 | 0.4051 | 236.2  | 2 11/20  | 2.22 | 1.93 | 0.87 |
| 4862-4863 | K.NLNEKDYELLCLDGT.R           | 2230.3 | 3 | 3.29 | 0.4663 | 470.2  | 1 25/60  | 3.91 | 2.74 | 0.70 |
| 4912-4913 | K.DGAGDVA.FVK.H               | 1266.8 | 2 | 2.71 | 0.4228 | 1681.1 | 1 17/18  | 2.61 | 2.63 | 1.01 |
| 4949-4950 | R.TAGWNIPMGLLYNK.I            | 1866.1 | 3 | 3.81 | 0.2721 | 432    | 2 21/52  | 3.68 | 3.09 | 0.84 |
| 4969-4970 | K.NLNEKDYELLCLDGT.R           | 2230.3 | 3 | 3.51 | 0.3942 | 366.5  | 1 24/60  | 2.36 | 1.91 | 0.81 |
| 4974-4975 | K.MYLGVEYVTAIR.N              | 1622.9 | 2 | 3.65 | 0.0986 | 1059.4 | 2 19/22  | 3.89 | 3.27 | 0.84 |
| 4989-4990 | K.GDVA.FVK.H                  | 1023.7 | 2 | 2.40 | 0.3492 | 863.5  | 1 12/12  | 2.4  | 2.72 | 1.13 |
| 5024-5025 | K.DGAGDVA.FVK.H               | 1266.8 | 2 | 2.04 | 0.187  | 386.9  | 6 14/18  | 2.75 | 1.9  | 0.69 |
| 5069-5070 | R.TAGWNIPMGLLYNK.I            | 1866.1 | 3 | 3.27 | 0.2239 | 511.6  | 4 20/52  | 3.31 | 3.09 | 0.93 |
| 5274-5275 | R.WCAVSEHEATK.C               | 1595.0 | 3 | 2.62 | 0.1009 | 1365.3 | 1 23/40  | 2.34 | 2.99 | 1.28 |
| 5282-5283 | K.DGAGDVA.FVK.H               | 1266.8 | 2 | 2.05 | 0.1747 | 475.5  | 1 15/18  | 2.4  | 2.15 | 0.90 |
| 5309-5310 | K.GDVA.FVK.H                  | 1023.7 | 2 | 2.93 | 0.3411 | 1223.7 | 1 12/12  | 2.96 | 2.72 | 0.92 |
| 5399-5400 | K.DGAGDVA.FVK.H               | 1266.8 | 2 | 2.82 | 0.3829 | 1137.7 | 1 17/18  | 2.8  | 2.98 | 1.06 |
| 5412-5413 | K.EGYGYTGAFR.C                | 1427.7 | 2 | 2.94 | 0.4505 | 470.8  | 1 14/20  | 2.29 | 0.00 | 0.00 |
| 5424-5425 | R.EGTPEAPTDECKPVK.W           | 2228.4 | 3 | 4.44 | 0.3587 | 1164.1 | 1 27/60  | 4.53 | 3.86 | 0.85 |
| 5434-5435 | K.GDVA.FVK.H                  | 1023.7 | 2 | 2.90 | 0.3421 | 1223   | 1 12/12  | 2.53 | 2.62 | 1.04 |
| 5497-5498 | R.WCAVSEHEATK.C               | 1595.0 | 3 | 2.88 | 0.2654 | 1025.7 | 1 22/40  | 2.77 | 2.82 | 1.02 |
| 5502-5503 | K.DGAGDVA.FVK.H               | 1266.8 | 2 | 2.59 | 0.3487 | 509.8  | 1 14/18  | 2.79 | 2.77 | 0.99 |
| 5559-5560 | K.GDVA.FVK.H                  | 1023.7 | 2 | 2.70 | 0.3924 | 1001.8 | 1 12/12  | 2.58 | 2.51 | 0.97 |
| 5587-5588 | K.SVPSDQPSVACVK.K             | 1693.1 | 3 | 2.58 | 0.2583 | 575.1  | 1 22/52  | 2.42 | 2.68 | 1.11 |
| 5607-5608 | R.WCAVSEHEATK.C               | 1595.0 | 3 | 2.50 | 0.1476 | 1030.8 | 1 21/40  | 2.49 | 3    | 1.20 |
| 5644-5645 | K.NLNEKDYELLCLDGT.R           | 2230.3 | 3 | 2.84 | 0.1657 | 293    | 1 22/60  | 3.51 | 1.61 | 0.46 |
| 5647-5648 | K.DGAGDVA.FVK.H               | 1266.8 | 2 | 2.45 | 0.2575 | 274.5  | 9 12/18  | 2.4  | 2.3  | 0.96 |
| 5727-5728 | R.EGTPEAPTDECKPVK.W           | 2228.4 | 3 | 3.64 | 0.4483 | 385.6  | 1 28/60  | 4.14 | 2.14 | 0.52 |
| 5747-5748 | K.DGAGDVA.FVK.H               | 1266.8 | 2 | 2.58 | 0.3529 | 638.2  | 1 16/18  | 2.38 | 2.85 | 1.20 |
| 5837-5838 | K.DSGFOMQLR.G                 | 1339.7 | 2 | 2.52 | 0.2132 | 350.6  | 2 15/18  | 2.67 | 1.35 | 0.51 |
| 5842-5843 | K.DGAGDVA.FVK.H               | 1266.8 | 2 | 2.73 | 0.3233 | 729    | 1 16/18  | 2.77 | 2.46 | 0.89 |
| 5942-5943 | K.DGAGDVA.FVK.H               | 1266.8 | 2 | 2.07 | 0.2899 | 260.8  | 6 13/18  | 1.93 | 1.92 | 0.99 |
| 5962-5963 | K.GDVA.FVK.H                  | 1023.7 | 2 | 2.13 | 0.2734 | 294.7  | 1 12/12  | 2.73 | 1.89 | 0.69 |
| 6037-6038 | K.NLNEKDYELLCLDGT.R           | 2230.3 | 3 | 2.94 | 0.3608 | 385.2  | 1 26/60  | 3.59 | 2.18 | 0.61 |
| 6364-6365 | K.VLGEYVKA                    | 1288.8 | 2 | 2.52 | 0.3986 | 713.7  | 1 14/14  | 1.64 | 1.33 | 0.81 |
| 6469-6470 | K.VLGEYVKA                    | 1288.8 | 2 | 2.18 | 0.3429 | 578.4  | 1 14/14  | 2.13 | 2.16 | 1.01 |
| 6552-6553 | K.DGAGDVA.FVK.H               | 1266.8 | 2 | 2.86 | 0.35   | 1514.1 | 1 17/18  | 2.95 | 3.22 | 1.09 |
| 6642-6643 | R.WCAVSEHEATK.C               | 1595.0 | 3 | 2.65 | 0.1978 | 683.6  | 1 20/40  | 2.84 | 0.00 | 0.00 |
| 6709-6710 | R.KPVDEYK.D                   | 1310.9 | 3 | 3.39 | 0.2562 | 1138.7 | 1 19/24  | 3.4  | 3.12 | 0.92 |
| 6729-6730 | R.WCAVSEHEATK.C               | 1595.0 | 3 | 2.86 | 0.2484 | 916.6  | 1 20/40  | 2.44 | 2.86 | 1.17 |
| 6762-6763 | R.APNHAVTR.K                  | 1108.7 | 3 | 2.65 | 0.3561 | 595    | 1 17/32  | 2.23 | 2.74 | 1.23 |
| 6772-6773 | R.KPVDEYK.D                   | 1310.9 | 3 | 3.36 | 0.23   | 1052.2 | 1 19/24  | 3.31 | 3.29 | 0.99 |
| 6827-6828 | R.APNHAVTR.K                  | 1108.7 | 3 | 2.89 | 0.351  | 750.9  | 1 19/32  | 2.4  | 3    | 1.35 |
| 6892-6893 | R.APNHAVTR.K                  | 1108.7 | 3 | 2.63 | 0.2586 | 638.2  | 1 17/32  | 2.36 | 2.17 | 0.92 |
| 6912-6913 | R.KPVDEYK.D                   | 1310.9 | 3 | 2.94 | 0.2499 | 715.2  | 2 17/24  | 2.78 | 2.91 | 1.05 |
| 6959-6960 | R.APNHAVTR.K                  | 1108.7 | 3 | 2.65 | 0.3134 | 579.2  | 2 16/32  | 2.27 | 2.55 | 1.12 |
| 7104-7105 | R.APNHAVTR.K                  | 1108.7 | 3 | 2.60 | 0.3056 | 580.2  | 1 16/32  | 2.22 | 2.61 | 1.18 |

| File, Scan(s) | Sequence                                       | MH+    | Charge | Xcorr (merged CID/PQD) | Score  | Accession | Peptides (Hits) | Count | Xcorr (CID) | Xcorr (PQD) | Ratio (PQD/CID) |
|---------------|------------------------------------------------|--------|--------|------------------------|--------|-----------|-----------------|-------|-------------|-------------|-----------------|
| gjl114939.sp  | P00722 BGAL_ECOLI Beta-galactosidase (Lactase) | 1244.7 | 3      | 3.30                   | 0.3469 | 510.5     | 52 (52 0 0 0 0) | 3.26  | 2.89        | 0.89        |                 |
| 1427-1428     | R.TDRPSQLR.S                                   | 1244.7 | 3      | 2.49                   | 0.3215 | 296       | 12/16           | 2.69  | 1.6         | 0.59        |                 |
| 1434-1435     | R.TDRPSQLR.S                                   | 1244.7 | 3      | 2.49                   | 0.3215 | 296       | 12/16           | 2.69  | 1.6         | 0.59        |                 |
| 1882-1883     | K.QNNFNVR.C                                    | 1106.6 | 2      | 2.60                   | 0.1483 | 1052.5    | 1 14/14         | 2.6   | 2.5         | 0.96        |                 |
| 1902-1903     | R.TPHPALTEAK.H                                 | 1352.9 | 2      | 2.82                   | 0.5511 | 346.1     | 1 14/18         | 3.16  | 2.81        | 0.89        |                 |
| 1912-1913     | R.TPHPALTEAK.H                                 | 1352.9 | 3      | 3.82                   | 0.4965 | 1344.7    | 1 21/36         | 3.83  | 3.08        | 0.80        |                 |
| 2032-2033     | R.YSQQLMETS.H                                  | 1651.9 | 3      | 5.00                   | 0.383  | 1739.9    | 1 27/44         | 4.89  | 4.45        | 0.91        |                 |
| 2252-2253     | R.WVYGQDSR.L                                   | 1211.7 | 2      | 3.04                   | 0.4299 | 1207.8    | 1 16/16         | 3.15  | 3.13        | 0.99        |                 |
| 2302-2303     | R.RDWENPGVTQLNR.L                              | 1728.9 | 3      | 5.53                   | 0.3267 | 2607.9    | 1 32/48         | 5.69  | 4.68        | 0.82        |                 |
| 2312-2313     | R.RDWENPGVTQLNR.L                              | 1728.9 | 2      | 4.11                   | 0.4631 | 852.3     | 1 20/24         | 4.43  | 3.38        | 0.76        |                 |
| 2457-2458     | R.APLDNDIGVSEATR.I                             | 1601.9 | 2      | 4.10                   | 0.6228 | 1861.8    | 1 24/26         | 3.99  | 3.66        | 0.92        |                 |
| 2527-2528     | R.DWENPGVTQLNR.L                               | 1572.8 | 3      | 3.74                   | 0.2995 | 619       | 1 22/44         | 3.25  | 2.86        | 0.88        |                 |
| 2549-2550     | R.DWENPGVTQLNR.L                               | 1572.8 | 2      | 4.41                   | 0.2816 | 2095.7    | 1 22/22         | 4.1   | 3.52        | 0.86        |                 |
| 2564-2565     | K.TLFSR.K                                      | 880.2  | 2      | 2.20                   | 0.3555 | 540.2     | 2 10/10         | 2.19  | 2.53        | 1.16        |                 |
| 2602-2603     | K.HQQQFFOFR.L                                  | 1409.8 | 3      | 3.69                   | 0.4631 | 1010.9    | 1 20/32         | 3.6   | 3.44        | 0.96        |                 |
| 2612-2613     | K.HQQQFFOFR.L                                  | 1409.8 | 2      | 3.08                   | 0.5283 | 920.8     | 1 16/16         | 2.92  | 3.11        | 1.07        |                 |
| 2684-2685     | R.VDEDQPPAVPK.W                                | 1630.0 | 3      | 3.48                   | 0.457  | 1668.5    | 1 29/44         | 3.11  | 3.2         | 1.03        |                 |
| 2687-2688     | R.VDEDQPPAVPK.W                                | 1630.0 | 2      | 4.07                   | 0.5737 | 2065.4    | 1 22/22         | 4.04  | 4.16        | 1.03        |                 |
| 2769-2770     | R.GDFQNSR.Y                                    | 1227.7 | 2      | 3.52                   | 0.437  | 1376.7    | 1 16/16         | 3.94  | 3.33        | 0.85        |                 |
| 2784-2785     | R.LAHPFFASWR.N                                 | 1396.8 | 2      | 2.74                   | 0.4921 | 595.6     | 1 17/20         | 2.93  | 2.77        | 0.95        |                 |
| 2819-2820     | R.IDPNAWYER.W                                  | 1243.7 | 2      | 2.69                   | 0.3388 | 609.4     | 1 15/16         | 2.74  | 2.67        | 0.97        |                 |
| 2842-2843     | K.YWQAFR.Q                                     | 1014.6 | 2      | 2.20                   | 0.3326 | 552.8     | 1 10/10         | 2.31  | 1.91        | 0.83        |                 |
| 2887-2888     | K.QLTLRDRDQFTRA                                | 1632.0 | 3      | 2.69                   | 0.349  | 462.7     | 2 19/44         | 2.88  | 2.65        | 0.92        |                 |
| 2909-2910     | R.WLPMSER.V                                    | 1133.6 | 2      | 2.27                   | 0.2696 | 532.3     | 1 13/14         | 2.32  | 2.01        | 0.87        |                 |
| 3032-3033     | K.YDENGNPWSAYGGDFGDTNDR.Q                      | 2591.1 | 2      | 6.65                   | 0.7793 | 3276.9    | 1 31/42         | 6.04  | 6.33        | 1.05        |                 |
| 3117-3118     | R.LAVMLR.W                                     | 945.7  | 2      | 2.98                   | 0.1598 | 803.1     | 1 12/12         | 3.34  | 2.6         | 0.78        |                 |
| 3187-3188     | R.WSDGSYLEDDMWR.M                              | 1931.9 | 2      | 4.92                   | 0.6283 | 2344.7    | 1 26/26         | 5.35  | 4.89        | 0.91        |                 |
| 3197-3198     | R.WSDGSYLEDDMWR.M                              | 1931.9 | 3      | 4.94                   | 0.4148 | 1907.3    | 1 28/52         | 4.66  | 3.57        | 0.77        |                 |
| 3242-3243     | R.VVQPNATAWSAGHISAWQQWR.L                      | 2666.4 | 3      | 6.72                   | 0.6393 | 2038.9    | 1 40/84         | 6.4   | 6.75        | 1.05        |                 |
| 3269-3270     | R.VNVLGLGPOENYRDR.L                            | 1902.0 | 2      | 5.67                   | 0.5048 | 2005.8    | 1 24/28         | 5.27  | 5.31        | 1.01        |                 |
| 3284-3285     | R.IGLNCQLQVAER.V                               | 1605.0 | 3      | 4.71                   | 0.56   | 2052.1    | 1 22/24         | 4.53  | 5.06        | 1.12        |                 |
| 3299-3300     | R.IGLNCQLQVAER.V                               | 1605.0 | 3      | 3.74                   | 0.3995 | 1340.7    | 1 23/48         | 3.84  | 3.08        | 0.80        |                 |
| 3304-3305     | R.VGLYVDEANIEHGMMPMNR.L                        | 2552.3 | 3      | 6.94                   | 0.6464 | 3982.4    | 1 44/80         | 6.6   | 6.64        | 1.01        |                 |
| 3497-3498     | R.AVVELHTADGTLIEACDVGFR.E                      | 2606.4 | 3      | 7.71                   | 0.6787 | 2866.5    | 1 44/88         | 7.58  | 7.57        | 1.00        |                 |
| 3504-3505     | R.QFCMNLV.FADR.T                               | 1590.9 | 2      | 4.05                   | 0.4024 | 1881.9    | 1 22/22         | 4.26  | 3.39        | 0.80        |                 |
| 3529-3530     | R.LSGQTIEVTSEYLF.R.H                           | 1887.1 | 2      | 6.21                   | 0.5947 | 2590.2    | 1 26/28         | 6.63  | 5.47        | 0.83        |                 |
| 3534-3535     | R.LSGQTIEVTSEYLF.R.H                           | 1887.  |        |                        |        |           |                 |       |             |             |                 |

|           |                      |        |   |      |        |       |         |      |      |      |
|-----------|----------------------|--------|---|------|--------|-------|---------|------|------|------|
| 4132-4133 | R.LQGGFVVDWVDSOLIK.Y | 2179.3 | 3 | 4.73 | 0.3879 | 905.8 | 1 24/60 | 4.18 | 4.4  | 1.05 |
| 4187-4188 | R.LPSEFDLSAFLR.A     | 1538.9 | 2 | 2.87 | 0.236  | 596   | 1 16/22 | 2.96 |      | 0.00 |
| 6707-6708 | R.TDRPSQQLR.S        | 1244.7 | 3 | 2.54 | 0.1204 | 584.9 | 1 16/32 | 2.16 | 2.36 | 1.09 |
| 6814-6815 | R.TDRPSQQLR.S        | 1244.7 | 3 | 2.55 | 0.1713 | 632.1 | 1 17/32 | 2.23 | 2.45 | 1.10 |
| 6929-6930 | R.TDRPSQQLR.S        | 1244.7 | 3 | 2.69 | 0.1527 | 559   | 3 16/32 | 2.53 | 2.4  | 0.95 |
| 6994-6995 | R.TDRPSQQLR.S        | 1244.7 | 3 | 2.81 | 0.1672 | 581.7 | 5 16/32 | 2.61 | 2.44 | 0.93 |

| Reference                                                             | Sequence                       | MH+    | Charge | Xcorr (merged CID/PQD) | Score  | Accession | Peptides (Hits) | Count | Xcorr (CID) | Xcorr (PQD) | Ratio (PQD/CID) |
|-----------------------------------------------------------------------|--------------------------------|--------|--------|------------------------|--------|-----------|-----------------|-------|-------------|-------------|-----------------|
| gjl125910[sp]P02754 LACB_BOVIN Beta-lactoglobulin precursor (Beta-LG) | K.WENGCECAQK.I                 | 1671.1 | 3      | 2.90                   | 0.1362 | 1315.3    | 124/36          | 2.76  | 2.33        | 0.84        |                 |
| 2087-2088                                                             | K.GLDIQK.V                     | 961.7  | 2      | 2.17                   | 0.1003 | 727       | 2 10/10         | 2.73  | 2.13        | 0.78        |                 |
| 2137-2138                                                             | K.IDALNENK.V                   | 1204.8 | 1      | 3.02                   | 0.3066 | 558       | 1 14/14         | 2.91  | 2.77        | 0.95        |                 |
| 2144-2145                                                             | K.GLDIQK.V                     | 961.7  | 1      | 1.75                   | 0.1736 | 468.2     | 2 10/10         | 1.8   | 1.78        | 0.99        |                 |
| 2157-2158                                                             | K.ALPMHIR.L                    | 981.6  | 3      | 2.59                   | 0.2974 | 698.2     | 2 14/24         | 2.45  | 2.43        | 0.99        |                 |
| 2234-2235                                                             | K.ALPMHIR.L                    | 981.6  | 2      | 2.64                   | 0.1975 | 672.6     | 1 12/12         | 2.62  | 2.59        | 0.99        |                 |
| 2239-2240                                                             | K.WENGCECAQK.K                 | 1398.9 | 2      | 3.63                   | 0.418  | 1550.3    | 1 16/16         | 3.73  | 3.3         | 0.88        |                 |
| 2242-2243                                                             | R.TPEVDDEALEKFDK.A             | 1533.9 | 2      | 4.83                   | 0.567  | 1552.1    | 1 19/20         | 4.76  | 4.42        | 0.93        |                 |
| 2277-2278                                                             | K.GLDIQK.V                     | 961.7  | 2      | 2.19                   | 0.2243 | 660.1     | 2 10/10         | 2.27  | 2.13        | 0.94        |                 |
| 2287-2288                                                             | R.TPEVDDEALEK.F                | 1533.9 | 1      | 3.60                   | 0.4903 | 1145.2    | 1 17/20         | 3.21  | 3.54        | 1.10        |                 |
| 2297-2298                                                             | K.IDALNENK.V                   | 1204.8 | 2      | 3.34                   | 0.4016 | 1854.8    | 1 14/14         | 3.28  | 3.06        | 0.93        |                 |
| 2309-2310                                                             | K.TKIPAVFK.I                   | 1336.0 | 2      | 3.29                   | 0.311  | 678.5     | 1 13/14         | 3.34  | 3.16        | 0.95        |                 |
| 2472-2473                                                             | K.TKIPAVFK.I                   | 1336.0 | 3      | 3.71                   | 0.4255 | 1574.8    | 1 23/28         | 3.77  | 2.85        | 0.76        |                 |
| 2477-2478                                                             | K.IDALNENK.V                   | 1204.8 | 2      | 2.94                   | 0.3962 | 684.9     | 1 13/14         | 2.66  | 2.94        | 1.11        |                 |
| 2569-2570                                                             | K.VLVLDTDYK.K                  | 1626.2 | 2      | 4.29                   | 0.4961 | 1767.1    | 1 18/18         | 4.68  | 4.12        | 0.88        |                 |
| 2587-2588                                                             | K.TKIPAVFK.I                   | 1336.0 | 3      | 3.98                   | 0.4242 | 1383.3    | 1 22/28         | 3.83  | 2.94        | 0.77        |                 |
| 2649-2650                                                             | R.TPEVDDEALEKFDK.A             | 2068.3 | 3      | 5.43                   | 0.5934 | 1407.1    | 1 32/52         | 5.27  | 4.74        | 0.90        |                 |
| 2694-2695                                                             | R.TPEVDDEALEKFDK.A             | 2068.3 | 2      | 5.39                   | 0.5197 | 1997.8    | 1 24/26         | 5.75  | 4.46        | 0.78        |                 |
| 2707-2708                                                             | K.VLVLDTDYK.K                  | 1626.2 | 3      | 3.49                   | 0.5018 | 618.5     | 1 23/36         | 3.42  | 3.43        | 1.00        |                 |
| 2744-2745                                                             | K.IPAVFK.I                     | 962.7  | 2      | 2.02                   | 0.3021 | 459.8     | 1 10/10         | 2.16  | 1.7         | 0.79        |                 |
| 2789-2790                                                             | K.IPAVFK.I                     | 962.7  | 1      | 1.77                   | 0.319  | 423.3     | 1 9/10          | 1.72  | 1.77        | 1.03        |                 |
| 2807-2808                                                             | K.VLVLDTDYK.K                  | 1353.9 | 1      | 3.01                   | 0.4654 | 1180.7    | 1 16/16         | 2.6   | 2.84        | 1.10        |                 |
| 2932-2933                                                             | K.VLVLDTDYK.K                  | 1353.9 | 2      | 3.48                   | 0.2716 | 1564      | 1 16/16         | 3.29  | 3.33        | 1.01        |                 |
| 2982-2983                                                             | K.VLVLDTDYK.K                  | 1353.9 | 2      | 3.07                   | 0.288  | 1137.5    | 1 14/16         | 2.86  | 2.54        | 0.89        |                 |
| 3139-3140                                                             | R.VYVEELKPTPEGDLEILLQK.W       | 2745.7 | 3      | 7.50                   | 0.5644 | 2259.3    | 1 37/76         | 7.68  | 6.18        | 0.80        |                 |
| 3517-3518                                                             | R.VYVEELKPTPEGDLEILLQK.W       | 2745.7 | 2      | 4.94                   | 0.5985 | 1270.5    | 1 26/38         | 5.2   | 4.85        | 0.93        |                 |
| 3524-3525                                                             | R.VYVEELKPTPEGDLEILLQK.W       | 2745.7 | 3      | 6.81                   | 0.5716 | 2468.8    | 1 36/76         | 7.18  | 6.12        | 0.85        |                 |
| 3652-3653                                                             | R.LSFNPTOLEEOCHI.-             | 1849.0 | 2      | 4.38                   | 0.508  | 1156      | 1 19/26         | 3.95  | 3.85        | 0.97        |                 |
| 3699-3700                                                             | R.VYVEELKPTPEGDLEILLQK.W       | 2745.7 | 3      | 3.85                   | 0.3112 | 369.8     | 1 26/76         | 3.5   | 3.51        | 1.00        |                 |
| 3799-3800                                                             | R.LSFNPTOLEEOCHI.-             | 1849.0 | 2      | 5.33                   | 0.5873 | 2117.8    | 1 24/26         | 5.17  | 4.74        | 0.92        |                 |
| 3822-3823                                                             | R.VYVEELKPTPEGDLEILLQK.W       | 2745.7 | 3      | 6.43                   | 0.6069 | 2769.1    | 1 38/76         | 5.68  | 5.5         | 0.97        |                 |
| 3924-3925                                                             | R.LSFNPTOLEEOCHI.-             | 1849.0 | 2      | 5.12                   | 0.5167 | 2258.3    | 1 24/26         | 5.05  | 4.66        | 0.92        |                 |
| 3952-3953                                                             | R.TPEVDDEALEKFDK.A             | 2068.3 | 3      | 3.30                   | 0.1581 | 691.8     | 1 23/52         | 2.78  | 3.14        | 1.13        |                 |
| 4077-4078                                                             | R.LSFNPTOLEEOCHI.-             | 1849.0 | 2      | 5.41                   | 0.5634 | 2676      | 1 25/26         | 5.13  | 5.32        | 1.04        |                 |
| 4079-4080                                                             | R.VYVEELKPTPEGDLEILLQK.W       | 2745.7 | 3      | 6.50                   | 0.5115 | 2737.8    | 1 36/76         | 6.37  | 5.05        | 0.79        |                 |
| 4182-4183                                                             | R.LSFNPTOLEEOCHI.-             | 1849.0 | 2      | 4.66                   | 0.5526 | 2098      | 1 23/26         | 4.34  | 4.46        | 1.03        |                 |
| 4207-4208                                                             | K.VAGTWYSLAMAASDISLLDAQSAPLR.V | 2851.5 | 2      | 7.13                   | 0.7303 | 3470.3    | 1 32/50         | 6.24  | 6.34        | 1.02        |                 |
| 4214-4215                                                             | R.VYVEELKPTPEGDLEILLQK.W       | 2745.7 | 3      | 5.90                   | 0.4767 | 2526.8    | 1 35/76         | 5.93  | 5.13        | 0.87        |                 |
| 4262-4263                                                             | R.LSFNPTOLEEOCHI.-             | 1849.0 | 2      | 5.35                   | 0.5884 | 2222.1    | 1 23/26         | 4.9   | 5.28        | 1.08        |                 |
| 4307-4308                                                             | K.VAGTWYSLAMAASDISLLDAQSAPLR.V | 2851.5 | 2      | 8.20                   | 0.7853 | 3802.4    | 1 32/50         | 7.03  | 8.01        | 1.14        |                 |
| 4312-4313                                                             | K.VLVLDTDYK.K                  | 1626.2 | 3      | 3.31                   | 0.4698 | 752.5     | 1 21/36         | 3.22  | 3.24        | 1.01        |                 |
| 4352-4353                                                             | K.ALPMHIR.L                    | 981.6  | 3      | 2.58                   | 0.1025 | 779.2     | 1 14/24         | 2.27  | 2.00        | 0.00        |                 |
| 4354-4355                                                             | K.ALPMHIRLSFNPTOLEEOCHI.-      | 2667.5 | 3      | 2.85                   | 0.1041 | 245.5     | 2 18/80         | 2.84  | 0.00        | 0.00        |                 |
| 4357-4358                                                             | R.VYVEELKPTPEGDLEILLQK.W       | 2745.7 | 3      | 6.45                   | 0.4895 | 2877.7    | 1 36/76         | 6.8   | 5.31        | 0.78        |                 |
| 4392-4393                                                             | R.LSFNPTOLEEOCHI.-             | 1849.0 | 2      | 4.54                   | 0.5913 | 2720.2    | 1 25/26         | 4.34  | 4.79        | 1.10        |                 |
| 4412-4413                                                             | K.VLVLDTDYK.K                  | 1626.2 | 3      | 4.15                   | 0.4378 | 1360      | 1 23/36         | 3.81  | 4           | 1.05        |                 |
| 4462-4463                                                             | K.IDALNENK.V                   | 1204.8 | 2      | 3.32                   | 0.3762 | 1646.8    | 1 14/14         | 3.28  | 3.2         | 0.98        |                 |
| 4494-4495                                                             | R.VYVEELKPTPEGDLEILLQK.W       | 2745.7 | 3      | 6.71                   | 0.5249 | 3218.4    | 1 38/76         | 6.81  | 6.43        | 0.94        |                 |
| 4497-4498                                                             | R.LSFNPTOLEEOCHI.-             | 1849.0 | 2      | 5.40                   | 0.5134 | 2284.7    | 1 25/26         | 4.93  | 4.9         | 1.01        |                 |
| 4522-4523                                                             | R.VYVEELKPTPEGDLEILLQK.W       | 2745.7 | 3      | 3.94                   | 0.4009 | 1334.2    | 1 21/28         | 3.66  | 3.59        | 0.98        |                 |
| 4529-4530                                                             | K.VLVLDTDYK.K                  | 1353.9 | 2      | 2.98                   | 0.2845 | 1318.8    | 1 15/16         | 2.92  | 0.00        | 0.00        |                 |
| 4592-4593                                                             | R.TPEVDDEALEKFDK.A             | 2068.3 | 3      | 2.61                   | 0.1036 | 453.8     | 1 19/52         | 2.34  | 0.00        | 0.00        |                 |
| 4594-4595                                                             | K.VAGTWYSLAMAASDISLLDAQSAPLR.V | 2851.5 | 3      | 7.64                   | 0.6195 | 2688.4    | 1 44/100        | 7.35  | 7.43        | 1.01        |                 |
| 4602-4603                                                             | R.LSFNPTOLEEOCHI.-             | 1849.0 | 2      | 5.33                   | 0.5605 | 2105.5    | 1 24/26         | 4.98  | 5.38        | 1.08        |                 |
| 4632-4633                                                             | K.IDALNENK.V                   | 1204.8 | 2      | 3.12                   | 0.3404 | 1756.5    | 1 14/14         | 3.41  | 3.19        | 0.94        |                 |
| 4674-4675                                                             | K.VLVLDTDYK.K                  | 1626.2 | 3      | 3.94                   | 0.3716 | 1070      | 1 23/36         | 3.86  | 3.81        | 0.99        |                 |
| 4844-4845                                                             | K.TKIPAVFK.I                   | 1336.0 | 3      | 3.20                   | 0.4456 | 1216.6    | 1 19/28         | 2.91  | 3.18        | 1.09        |                 |
| 4729-4730                                                             | R.LSFNPTOLEEOCHI.-             | 1849.0 | 2      | 4.75                   | 0.5819 | 2543.5    | 1 25/26         | 4.63  | 4.72        | 1.02        |                 |
| 4742-4743                                                             | R.LSFNPTOLEEOCHI.-             | 1849.0 | 2      | 2.68                   | 0.2711 | 1428.1    | 1 15/16         | 2.72  | 0.00        | 0.00        |                 |
| 4744-4745                                                             | K.VLVLDTDYK.K                  | 1353.9 | 2      | 3.22                   | 0.3328 | 1647.5    | 1 14/14         | 3.29  | 3.11        | 0.95        |                 |
| 4787-4788                                                             | K.IDALNENK.V                   | 1204.8 | 2      | 4.00                   | 0.4125 | 821.9     | 1 21/36         | 3.85  | 3.95        | 1.03        |                 |
| 4794-4795                                                             | K.VLVLDTDYK.K                  | 1626.2 | 3      | 4.12                   | 0.4683 | 1311.3    | 1 28/52         | 4.09  | 0.00        | 0.00        |                 |
| 4822-4823                                                             | R.TPEVDDEALEKFDK.A             | 2068.3 | 3      | 6.38                   | 0.5249 | 2251.3    | 1 38/100        | 5.69  | 5.74        | 1.01        |                 |
| 4832-4833                                                             | K.VAGTWYSLAMAASDISLLDAQSAPLR.V | 2851.5 | 3      | 7.03                   | 0.5359 | 2935.8    | 1 37/76         | 6.94  | 6.08        | 0.88        |                 |
| 4834-4835                                                             | R.VYVEELKPTPEGDLEILLQK.W       | 2745.7 | 3      | 5.31                   | 0.5388 | 2461.5    | 1 25/26         | 4.96  | 4.86        | 0.98        |                 |
| 4852-4853                                                             | R.LSFNPTOLEEOCHI.-             | 1849.0 | 2      | 3.09                   | 0.2962 | 1537.4    | 1 16/16         | 3.3   | 2.71        | 0.82        |                 |
| 4884-4885                                                             | K.VLVLDTDYK.K                  | 1353.9 | 2      | 4.05                   | 0.3461 | 1275.6    | 1 20/28         | 3.79  | 3.77        | 0.99        |                 |
| 4889-4890                                                             | K.TKIPAVFK.I                   | 1336.0 | 3      | 3.24                   | 0.3364 | 1629.1    | 1 14/14         | 3.17  | 3.17        | 1.00        |                 |
| 4892-4893                                                             | K.IDALNENK.V                   | 1204.8 | 2      | 4.17                   | 0.4844 | 1088.4    | 1 23/36         | 4.05  | 4.16        | 1.03        |                 |
| 4897-4898                                                             | K.VLVLDTDYK.K                  | 1626.2 | 3      | 2.66                   | 0.3096 | 707.1     | 1 15/24         | 2.03  | 2.3         | 1.13        |                 |
| 4899-4900                                                             | K.ALPMHIR.L                    | 981.6  | 3      | 3.55                   | 0.3547 | 718.6     | 1 24/52         | 2.83  | 0.00        | 0.00        |                 |
| 4934-4935                                                             | R.TPEVDDEALEKFDK.A             | 2068.3 | 3      | 4.13                   | 0.2866 | 712.2     | 1 29/100        | 3.82  | 4.38        | 1.15        |                 |
| 4937-4938                                                             | K.VAGTWYSLAMAASDISLLDAQSAPLR.V | 2851.5 | 2      | 5.71                   | 0.5135 | 2521.3    | 1 25/26         | 5.16  | 5.33        | 1.03        |                 |
| 4957-4958                                                             | R.LSFNPTOLEEOCHI.-             | 1849.0 | 2      | 3.53                   | 0.3833 | 1184.6    | 1 20/28         | 3.37  | 3.59        | 1.07        |                 |
| 4992-4993                                                             | K.TKIPAVFK.I                   | 1336.0 | 3      | 3.22                   | 0.3403 | 1698.9    | 1 14/14         | 3.3   | 3.46        | 1.05        |                 |
| 4999-5000                                                             | K.IDALNENK.V                   | 1204.8 | 2      | 3.04                   | 0.3607 | 1307.8    | 1 16/16         | 2.95  | 2.63        | 0.89        |                 |
| 5009-5010                                                             | K.VLVLDTDYK.K                  | 1353.9 | 2      | 3.99                   | 0.4587 | 1106.4    | 1 24/36         | 3.69  | 3.99        | 1.08        |                 |
| 5034-5035                                                             | R.VYVEELKPTPEGDLEILLQK.W       | 2745.7 | 3      | 7.54                   | 0.5959 | 2559.1    | 1 40/100        | 7.3   | 6.94        | 0.95        |                 |
| 5042-5043                                                             | K.VAGTWYSLAMAASDISLLDAQSAPLR.V | 2851.5 | 3      | 6.96                   | 0.5547 | 2403.2    | 1 38/76         | 6.83  | 6.62        | 0.97        |                 |
| 5044-5045                                                             | R.LSFNPTOLEEOCHI.-             | 1849.0 | 2      | 5.29                   | 0.5328 | 2318.5    | 1 24/26         | 5.08  | 4.87        | 0.96        |                 |
| 5062-5063                                                             | R.TPEVDDEALEKFDK.A             | 2068.3 | 3      | 2.74                   | 0.2883 | 618.8     | 1 22/52         | 2.88  | 0.00        | 0.00        |                 |
| 5074-5075                                                             | K.WENGCECAQK.K                 | 1398.9 | 2      | 2.47                   | 0.2759 | 741.9     | 1 14/16         | 2.33  | 2.62        | 1.12        |                 |
| 5079-5080                                                             | K.IDALNENK.V                   | 1204.8 | 2      | 3.19                   | 0.3174 | 1658.3    | 1 14/14         | 3.19  | 3.31        | 1.04        |                 |
| 5112-5113                                                             | K.VLVLDTDYK.K                  | 1353.9 | 2      | 2.85                   | 0.2975 | 770.4     | 1 16/16         | 2.95  | 2.38        | 0.81        |                 |
| 5122-5123                                                             | K.VLVLDTDYK.K                  | 1626.2 | 3      | 3.93                   | 0.4337 | 1031.6    | 1 24/36         | 3.76  | 3.95        | 1.05        |                 |
| 5139-5140                                                             | K.VLVLDTDYK.K                  | 1626.2 | 3      | 4.63                   | 0.3937 | 1169.3    | 1 34/100        | 4.15  | 4.12        | 0.99        |                 |
| 5147-5148                                                             | K.VAGTWYSLAMAASDISLLDAQSAPLR.V | 2851.5 | 3      | 6.75                   | 0.5813 | 2218      | 1 36/76         | 6.91  | 6.33        | 0.92        |                 |
| 5154-5155                                                             | R.VYVEEL                       |        |        |                        |        |           |                 |       |             |             |                 |

|           |                                |        |   |      |        |        |   |        |      |      |      |
|-----------|--------------------------------|--------|---|------|--------|--------|---|--------|------|------|------|
| 5402-5403 | K.TKIPAVFK.I                   | 1336.0 | 3 | 3.87 | 0.4029 | 1040.1 | 1 | 19/28  | 3.66 | 3.63 | 0.99 |
| 5422-5423 | R.TPEVDDALEKFDK.A              | 2068.3 | 3 | 3.51 | 0.4568 | 841.6  | 1 | 26/52  | 4.04 | 3.02 | 0.75 |
| 5442-5443 | K.VLVLDTDYK.K                  | 1353.9 | 2 | 2.75 | 0.3524 | 703.5  | 1 | 16/16  | 3.02 | 2.02 | 0.67 |
| 5462-5463 | R.LSFNPTOLEEOCHI.-             | 1849.0 | 2 | 5.24 | 0.5654 | 2264.3 | 1 | 25/26  | 5.03 | 5.04 | 1.00 |
| 5472-5473 | K.VLVLDTDYK.Y                  | 1626.2 | 3 | 4.05 | 0.4303 | 1021.8 | 1 | 23/36  | 3.37 | 4.17 | 1.24 |
| 5477-5478 | R.VYVEELKPTPEGDLEILLQK.W       | 2745.7 | 3 | 6.83 | 0.5504 | 2556.4 | 1 | 39/76  | 6.97 | 5.93 | 0.85 |
| 5499-5500 | K.IDALNENK.V                   | 1204.8 | 2 | 3.21 | 0.2963 | 1457.5 | 1 | 14/14  | 3.29 | 3.35 | 1.02 |
| 5509-5510 | K.TKIPAVFK.I                   | 1336.0 | 3 | 4.03 | 0.4043 | 1358.7 | 1 | 21/28  | 3.72 | 3.9  | 1.05 |
| 5544-5545 | R.TPEVDDALEKFDK.A              | 2068.3 | 3 | 3.90 | 0.4441 | 676.5  | 1 | 25/52  | 3.52 | 2.98 | 0.85 |
| 5547-5548 | K.VAGTWYSLAMAASDISLLDAQSAPLR.V | 2851.5 | 3 | 7.14 | 0.5294 | 2273.8 | 1 | 39/100 | 6.86 | 6.47 | 0.94 |
| 5549-5550 | K.VLVLDTDYK.K                  | 1353.9 | 2 | 2.86 | 0.3284 | 562.9  | 1 | 14/16  | 2.89 | 2.28 | 0.79 |
| 5564-5565 | R.LSFNPTOLEEOCHI.-             | 1849.0 | 2 | 5.03 | 0.4983 | 2152.9 | 1 | 24/26  | 5.1  | 4.57 | 0.90 |
| 5574-5575 | K.VLVLDTDYK.Y                  | 1626.2 | 3 | 3.78 | 0.416  | 867.6  | 1 | 22/36  | 3.65 | 4.25 | 1.16 |
| 5594-5595 | R.VYVEELKPTPEGDLEILLQK.W       | 2745.7 | 3 | 6.98 | 0.5597 | 2706.3 | 1 | 37/76  | 7.07 | 6.17 | 0.87 |
| 5612-5613 | K.IDALNENK.V                   | 1204.8 | 2 | 3.26 | 0.3228 | 1636.4 | 1 | 14/14  | 3.26 | 3.53 | 1.08 |
| 5629-5630 | K.TKIPAVFK.I                   | 1336.0 | 3 | 3.81 | 0.3714 | 1075.6 | 1 | 19/28  | 3.53 | 3.6  | 1.02 |
| 5654-5655 | K.VLVLDTDYK.K                  | 1353.9 | 2 | 2.98 | 0.1966 | 864.4  | 1 | 15/16  | 3.2  | 2.53 | 0.79 |
| 5657-5658 | R.LSFNPTOLEEOCHI.-             | 1849.0 | 2 | 5.03 | 0.5233 | 2485.6 | 1 | 25/26  | 5.1  | 4.69 | 0.92 |
| 5659-5660 | K.VAGTWYSLAMAASDISLLDAQSAPLR.V | 2851.5 | 3 | 4.59 | 0.3965 | 676.3  | 1 | 31/100 | 4.72 | 3.09 | 0.65 |
| 5707-5708 | K.IDALNENK.V                   | 1204.8 | 2 | 3.02 | 0.384  | 1523   | 1 | 14/14  | 3.27 | 3.39 | 1.04 |
| 5742-5743 | R.LSFNPTOLEEOCHI.-             | 1849.0 | 2 | 5.02 | 0.5344 | 2017.2 | 1 | 24/26  | 5.01 | 4.61 | 0.92 |
| 5744-5745 | K.VLVLDTDYK.K                  | 1353.9 | 2 | 2.72 | 0.2557 | 723.1  | 1 | 15/16  | 3.11 | 1.95 | 0.63 |
| 5847-5848 | R.LSFNPTOLEEOCHI.-             | 1849.0 | 2 | 5.13 | 0.5656 | 2116.9 | 1 | 25/26  | 4.88 | 4.55 | 0.93 |
| 5849-5850 | K.VLVLDTDYK.K                  | 1353.9 | 2 | 2.46 | 0.2702 | 288.8  | 1 | 13/16  | 2.83 | 1.7  | 0.60 |
| 5874-5875 | K.IDALNENK.V                   | 1204.8 | 2 | 3.28 | 0.3769 | 1257.3 | 1 | 14/14  | 3.33 | 3.02 | 0.91 |
| 5947-5948 | R.LSFNPTOLEEOCHI.-             | 1849.0 | 2 | 5.18 | 0.5501 | 1877.7 | 1 | 25/26  | 5.1  | 4.78 | 0.94 |
| 5959-5960 | K.VLVLDTDYK.K                  | 1353.9 | 2 | 2.33 | 0.152  | 422.1  | 1 | 15/16  | 2.65 | 1.68 | 0.63 |
| 5979-5980 | K.IDALNENK.V                   | 1204.8 | 2 | 3.05 | 0.3478 | 1014.1 | 1 | 14/14  | 2.98 | 3.12 | 1.05 |
| 6059-6060 | R.LSFNPTOLEEOCHI.-             | 1849.0 | 2 | 5.14 | 0.5643 | 2092.9 | 1 | 25/26  | 5.07 | 4.91 | 0.97 |
| 6072-6073 | K.VLVLDTDYK.K                  | 1353.9 | 2 | 2.51 | 0.3081 | 335.3  | 1 | 13/16  | 2.7  | 1.92 | 0.71 |
| 6104-6105 | K.VLVLDTDYK.Y                  | 1626.2 | 3 | 3.43 | 0.4287 | 923.8  | 1 | 23/36  | 3.11 | 3.35 | 1.08 |
| 6144-6145 | K.WENGECAOK.K                  | 1398.9 | 2 | 2.04 | 0.2724 | 322.4  | 2 | 15/16  | 2.69 | 1.32 | 0.49 |
| 6167-6168 | R.LSFNPTOLEEOCHI.-             | 1849.0 | 2 | 5.33 | 0.5418 | 2156.9 | 1 | 25/26  | 4.89 | 4.66 | 0.95 |
| 6214-6215 | K.VLVLDTDYK.K                  | 1353.9 | 2 | 2.54 | 0.3059 | 454.9  | 1 | 15/16  | 2.61 | 1.48 | 0.57 |
| 6254-6255 | K.IDALNENK.V                   | 1204.8 | 2 | 2.90 | 0.3526 | 1059.7 | 1 | 14/14  | 3.05 | 2.91 | 0.95 |
| 6307-6308 | K.VLVLDTDYK.Y                  | 1626.2 | 3 | 3.04 | 0.3715 | 531.4  | 1 | 20/36  | 2.68 | 2.71 | 1.01 |
| 6312-6313 | K.VLVLDTDYK.K                  | 1353.9 | 2 | 2.74 | 0.3811 | 550.3  | 1 | 15/16  | 2.67 | 1.54 | 0.58 |
| 6417-6418 | K.VLVLDTDYK.K                  | 1353.9 | 2 | 2.12 | 0.3413 | 441.6  | 1 | 15/16  | 2.7  | 1.22 | 0.45 |
| 6419-6420 | K.VLVLDTDYK.Y                  | 1626.2 | 3 | 3.19 | 0.4378 | 809    | 1 | 21/36  | 2.88 | 3.33 | 1.16 |
| 6434-6435 | R.LSFNPTOLEEOCHI.-             | 1849.0 | 2 | 5.20 | 0.5374 | 2660.8 | 1 | 25/26  | 5.08 | 4.82 | 0.95 |
| 6494-6495 | K.IDALNENK.V                   | 1204.8 | 2 | 2.91 | 0.3582 | 1175.1 | 1 | 14/14  | 3.03 | 3.04 | 1.00 |
| 6509-6510 | K.VAGTWYSLAMAASDISLLDAQSAPLR.V | 2851.5 | 3 | 3.33 | 0.1097 | 339.3  | 1 | 26/100 | 3.38 | 2.66 | 0.79 |
| 6514-6515 | K.VLVLDTDYK.K                  | 1353.9 | 2 | 2.24 | 0.246  | 393.4  | 1 | 14/16  | 2.61 | 1.93 | 0.74 |
| 6519-6520 | K.VLVLDTDYK.Y                  | 1626.2 | 3 | 3.91 | 0.4491 | 1263.6 | 1 | 25/36  | 3.85 | 4.05 | 1.05 |
| 6527-6528 | R.LSFNPTOLEEOCHI.-             | 1849.0 | 2 | 5.21 | 0.5265 | 2164.6 | 1 | 24/26  | 4.92 | 4.73 | 0.96 |
| 6529-6530 | R.VYVEELKPTPEGDLEILLQK.W       | 2745.7 | 3 | 7.00 | 0.5568 | 2892   | 1 | 38/76  | 7.44 | 6.35 | 0.85 |
| 6554-6555 | K.TKIPAVFK.I                   | 1336.0 | 3 | 3.73 | 0.3679 | 834.5  | 1 | 18/28  | 3.52 | 2.8  | 0.80 |
| 6572-6573 | K.ALPMHIR.L                    | 981.6  | 3 | 2.74 | 0.3184 | 874.2  | 1 | 15/24  | 2.44 | 2.5  | 1.02 |
| 6577-6578 | K.IDALNENK.V                   | 1204.8 | 2 | 3.29 | 0.285  | 1567.7 | 1 | 14/14  | 3.5  | 3.22 | 0.92 |
| 6594-6595 | K.VLVLDTDYK.Y                  | 1626.2 | 3 | 4.11 | 0.4333 | 1020   | 1 | 23/36  | 3.32 | 3.92 | 1.18 |
| 6647-6648 | K.ALPMHIR.L                    | 981.6  | 3 | 2.55 | 0.2938 | 1006.5 | 1 | 16/24  | 2.37 | 2.72 | 1.15 |
| 6649-6650 | K.IDALNENK.V                   | 1204.8 | 2 | 3.17 | 0.3875 | 1762.8 | 1 | 14/14  | 3.25 | 3.05 | 0.94 |
| 6659-6660 | K.VLVLDTDYK.K                  | 1353.9 | 2 | 3.44 | 0.2476 | 1553.8 | 1 | 16/16  | 3.36 | 3.05 | 0.91 |
| 6664-6665 | K.VLVLDTDYK.Y                  | 1626.2 | 3 | 3.78 | 0.533  | 1421.4 | 1 | 26/36  | 3.63 | 4.33 | 1.19 |
| 6694-6695 | K.TKIPAVFK.I                   | 1336.0 | 3 | 3.52 | 0.3481 | 1268.6 | 1 | 21/28  | 3.59 | 3.12 | 0.87 |
| 6712-6713 | K.ALPMHIR.L                    | 981.6  | 3 | 2.62 | 0.2786 | 910.3  | 1 | 15/24  | 2.1  | 2.51 | 1.20 |
| 6714-6715 | K.IDALNENK.V                   | 1204.8 | 2 | 3.34 | 0.37   | 1785.1 | 1 | 14/14  | 3.32 | 3.31 | 1.00 |
| 6777-6778 | K.ALPMHIR.L                    | 981.6  | 3 | 2.55 | 0.3161 | 923.6  | 1 | 15/24  | 2.38 | 2.47 | 1.04 |
| 6779-6780 | K.IDALNENK.V                   | 1204.8 | 2 | 3.63 | 0.3346 | 1797.7 | 1 | 14/14  | 3.59 | 3.29 | 0.92 |

| Reference File, Scan(s)                                     | Sequence             | MH+    | Charge | Xcorr (merged CID/PQD) | Score  | Accession | Peptides (Hits) | Count | Xcorr (CID) | Xcorr (PQD) | Ratio (PQD/CID) |
|-------------------------------------------------------------|----------------------|--------|--------|------------------------|--------|-----------|-----------------|-------|-------------|-------------|-----------------|
|                                                             |                      |        |        |                        | Delta  | Cn Sp     | RSp Ions        |       |             |             |                 |
| gjl125996[sp]P00711[LALBA_BOVIN Alpha-lactalbumin precursor |                      |        |        |                        |        |           | 51 (51 0 0 0 0) |       |             |             |                 |
| 2142-2143                                                   | K.ALCSEK.L           | 984.7  | 2      | 2.06                   | 0.197  | 553.8     | 2               | 10/10 | 2.27        | 1.83        | 0.81            |
| 2149-2150                                                   | K.ALCSEK.L           | 984.7  | 1      | 1.93                   | 0.3198 | 290.4     | 1               | 10/10 | 1.99        | 1.88        | 0.94            |
| 2292-2293                                                   | K.ALCSEK.L           | 984.7  | 2      | 2.29                   | 0.1927 | 679.5     | 1               | 10/10 | 2.27        | 2.09        | 0.92            |
| 2592-2593                                                   | K.CEVFR.E            | 843.6  | 1      | 1.90                   | 0.1925 | 252.4     | 1               | 8/8   | 1.7         | 1.76        | 1.04            |
| 2892-2893                                                   | K.DDQNPHESSNICSDCK.F | 2270.3 | 3      | 5.93                   | 0.5178 | 249.1     | 1               | 32/64 | 5.63        | 5.73        | 1.02            |
| 2904-2905                                                   | K.DDQNPHESSNICSDCK.F | 2270.3 | 2      | 6.02                   | 0.5423 | 2007.8    | 1               | 25/32 | 6.52        | 5.16        | 0.79            |
| 2979-2980                                                   | K.VGINYWLAAH.K       | 1489.0 | 3      | 4.08                   | 0.4    | 1768.2    | 1               | 25/36 | 4.01        | 3.78        | 0.94            |
| 2987-2988                                                   | K.VGINYWLAAH.K       | 1489.0 | 2      | 4.40                   | 0.3983 | 2030      | 1               | 18/18 | 4.61        | 4.57        | 0.99            |
| 3307-3308                                                   | K.LDQWLCEK.L         | 1368.9 | 2      | 3.44                   | 0.3136 | 1454.6    | 1               | 14/14 | 3.21        | 3.13        | 0.98            |
| 3324-3325                                                   | K.LDQVGINYWLAAH.K    | 2102.4 | 3      | 6.67                   | 0.6109 | 4050.2    | 1               | 36/52 | 6.69        | 6.6         | 0.99            |
| 3702-3703                                                   | K.FLDDDLTDDIMCVK.K   | 1977.1 | 2      | 6.02                   | 0.5825 | 3638.4    | 1               | 26/26 | 6.4         | 5.91        | 0.92            |
| 3707-3708                                                   | K.FLDDDLTDDIMCVK.K   | 1977.1 | 3      | 5.18                   | 0.5447 | 2143.8    | 1               | 32/52 | 4.3         | 5.07        | 1.18            |
| 3772-3773                                                   | K.LDQWLCEK.L         | 1482.0 | 2      | 3.49                   | 0.4409 | 1456.4    | 1               | 15/16 | 3.87        | 2.88        | 0.74            |
| 3787-3788                                                   | K.LDQWLCEK.L         | 1482.0 | 1      | 3.75                   | 0.4858 | 867.2     | 1               | 14/16 | 3.46        | 3.73        | 1.08            |
| 3902-3903                                                   | K.LDQWLCEK.L         | 1482.0 | 2      | 3.93                   | 0.4813 | 1522.5    | 1               | 15/16 | 3.62        | 3.53        | 0.98            |
| 3927-3928                                                   | K.FLDDDLTDDIMCVK.K   | 1977.1 | 2      | 2.10                   | 0.1208 | 250.8     | 1               | 15/26 | 2.09        | 1.08        | 0.52            |
| 3969-3970                                                   | K.ALCSEKLDQWLCEK.L   | 2303.5 | 3      | 4.98                   | 0.4553 | 1292.7    | 1               | 27/56 | 4.15        | 3.55        | 0.86            |
| 4032-4033                                                   | K.LDQWLCEK.L         | 1482.0 | 2      | 3.53                   | 0.4066 | 1641.3    | 1               | 15/16 | 3.65        | 3.49        | 0.96            |
| 4149-4150                                                   | K.LDQWLCEK.L         | 1482.0 | 2      | 3.47                   | 0.419  | 1721.2    | 1               | 15/16 | 3.63        | 3.24        | 0.89            |
| 4339-4340                                                   | K.CEVFR.E            | 843.6  | 2      | 2.12                   | 0.2628 | 612.9     | 1               | 8/8   | 1.73        | 2.01        | 1.16            |
| 4404-4405                                                   | K.LDQWLCEK.L         | 1482.0 | 2      | 4.02                   | 0.4683 | 1869.6    | 1               | 15/16 | 3.72        | 3.4         | 0.91            |
| 4449-4450                                                   | K.CEVFR.E            | 843.6  | 2      | 2.03                   | 0.275  | 547.3     | 1               | 8/8   | 1.65        | 1.88        | 1.14            |
| 4512-4513                                                   | K.LDQWLCEK.L         | 1482.0 | 2      | 3.55                   | 0.3695 | 1641.3    | 1               | 15/16 | 3.6         | 3.54        | 0.98            |
| 4622-4623                                                   | K.LDQWLCEK.L         | 1482.0 | 2      | 3.74                   | 0.4231 | 1824.2    | 1               | 15/16 | 3.93        | 3.42        | 0.87            |
| 4739-4740                                                   | K.LDQWLCEK.L         | 1482.0 | 2      | 3.59                   | 0.4039 | 1204.1    | 1               | 15/16 | 3.61        | 3.41        | 0.94            |
| 4812-4813                                                   | K.ALCSEK.L           | 984.7  | 2      | 2.06                   | 0.1124 | 579.7     | 1               | 10/10 | 2.01        | 1.97        | 0.98            |
| 4849-4850                                                   | K.LDQWLCEK.L         | 1482.0 | 2      | 3.61                   | 0.4007 | 945.8     | 1               | 15/16 | 3.72        | 3.15        | 0.85            |
| 4952-4953                                                   | K.LDQWLCEK.L         | 1482.0 | 2      | 3.87                   | 0.478  | 1294.1    | 1               | 15/16 | 3.94        | 3.29        | 0.84            |
| 5057-5058                                                   | K.VGINYWLAAH.K       | 1489.0 | 3      | 2.64                   | 0.2992 | 1450.9    | 1               | 22/36 | 2.87        | 2.87        | 1.00            |
| 5064-5065                                                   | K.LDQWLCEK.L         | 1482.0 | 2      | 3.46                   | 0.3975 | 1381.1    | 1               | 15/16 | 3.53        | 3.31        | 0.94            |
| 5169-5170                                                   | K.LDQWLCEK.L         | 1482.0 | 2      | 3.47                   | 0.4172 | 1275.1    | 1               | 15/16 | 3.58        | 3.26        | 0.91            |
| 5239-5240                                                   | K.ALCSEK.L           | 984.7  | 2      | 2.01                   | 0.3034 | 416.2     | 3               | 9/10  | 2           | 1.9         | 0.95            |
| 5269-5270                                                   | K.LDQWLCEK.L         | 1482.0 | 2      | 3.81                   | 0.4668 | 1301.7    | 1               | 15/16 | 3.85        | 3.25        | 0.84            |
| 5369-5370                                                   | K.LDQWLCEK.L         | 1482.0 | 2      | 3.46                   | 0.3815 | 1336.8    | 1               | 15/16 | 3.59        | 3.3         | 0.92            |
| 5464-5465                                                   | K.LDQWLCEK.L         | 1482.0 | 2      | 3.59                   | 0.4813 | 1522.5    | 1               | 15/16 | 3.73        | 3.27        | 0.88            |
| 5539-5540                                                   | K.ALCSEK.L           | 984.7  | 2      | 2.05                   | 0.1099 | 578.4     | 1               | 10/10 | 2.2         | 1.65        | 0.75            |
| 5562-5563                                                   | K.LDQWLCEK.L         | 1482.0 | 2      | 3.37                   | 0.3679 | 1375.9    | 1               | 15/16 | 3.52        | 3.35        | 0.95            |
| 5602-5603                                                   | K.LDQWLCEK.L         | 1368.9 | 2      | 2.92                   | 0.2134 | 805.5     | 1               | 14/14 | 2.83        | 2.35        | 0.83            |
| 5664-5665                                                   | K.LDQWLCEK.L         | 1482.0 | 2      | 3.27                   | 0.4415 | 949.7     | 1               | 15/16 | 3.32        | 3.21        | 0.97            |
| 5757-5758                                                   | K.LDQWLCEK.L         | 1482.0 | 2      | 3.86                   | 0.4686 | 1423.4    | 1               | 15/16 | 3.47        | 3.45        |                 |



| Reference                                                                    | Sequence                   | MH+    | Charge | Xcorr (merged CID/PQD) | Score    | Accession | Peptides (Hits) | Count             | Xcorr (CID) | Xcorr (PQD) | Ratio (PQD/CID) |
|------------------------------------------------------------------------------|----------------------------|--------|--------|------------------------|----------|-----------|-----------------|-------------------|-------------|-------------|-----------------|
| File, Scan(s)                                                                |                            |        |        |                        | Delta Cn | Sp        | RSp Ions        | 192 (192 0 0 0 0) |             |             |                 |
| 6604-6605                                                                    | K.VGINYWLAK.H.A            | 1489.0 | 3      | 3.47                   | 0.4048   | 1560.5    | 1 24/36         |                   | 3.18        | 3.32        | 1.04            |
| gj126608sp P00698 LYSC_CHICK Lysozyme C precursor (1,4-beta-N-acetylmuramida |                            |        |        |                        |          |           |                 |                   |             |             |                 |
| 1549-1550                                                                    | R.HGLDNYR.G                | 1018.6 | 2      | 2.04                   | 0.2875   | 682.7     | 1 11/12         |                   | 1.94        | 1.97        | 1.02            |
| 2217-2218                                                                    | K.FESNFNTQATNR.N           | 1572.8 | 2      | 5.01                   | 0.5575   | 1584.2    | 1 22/22         |                   | 4.97        | 4.25        | 0.86            |
| 2247-2248                                                                    | K.FESNFNTQATNR.N           | 1572.8 | 3      | 3.87                   | 0.4498   | 857.2     | 1 20/44         |                   | 3.28        | 3.75        | 1.14            |
| 2257-2258                                                                    | K.FESNFNTQATNR.N           | 1572.8 | 1      | 3.96                   | 0.6045   | 499.5     | 1 16/22         |                   | 3.7         | 2.18        | 0.59            |
| 2269-2270                                                                    | K.FESNFNTQATNR.N           | 1572.8 | 1      | 3.86                   | 0.4534   | 493.6     | 1 16/22         |                   | 3.9         | 2.2         | 0.56            |
| 2374-2375                                                                    | K.FESNFNTQATNR.N           | 1572.8 | 2      | 4.67                   | 0.5018   | 2107.7    | 1 22/22         |                   | 4.73        | 4.18        | 0.88            |
| 2757-2758                                                                    | K.FESNFNTQATNR.N           | 1572.8 | 2      | 4.71                   | 0.5188   | 2408.9    | 1 21/22         |                   | 4.43        | 4.52        | 1.02            |
| 2777-2778                                                                    | K.GTDVQAWIR.G              | 1189.7 | 2      | 3.36                   | 0.3449   | 1095.6    | 1 16/16         |                   | 3.66        | 3.84        | 1.05            |
| 2787-2788                                                                    | R.CELAAAMK.R               | 1170.8 | 2      | 3.44                   | 0.4184   | 2084      | 1 14/14         |                   | 3.53        | 3.27        | 0.93            |
| 2792-2793                                                                    | K.GTDVQAWIR.G              | 1189.7 | 1      | 2.56                   | 0.2589   | 499.9     | 1 15/16         |                   | 2.43        | 1.93        | 0.79            |
| 2804-2805                                                                    | R.CELAAAMK.R               | 1170.8 | 1      | 2.69                   | 0.378    | 1074.5    | 1 14/14         |                   | 2.61        | 2.22        | 0.85            |
| 2812-2813                                                                    | R.NTDGSTDYGILQINSR.W       | 1898.0 | 2      | 5.02                   | 0.6479   | 2852.1    | 1 27/30         |                   | 4.82        | 5.18        | 1.07            |
| 2829-2830                                                                    | R.NTDGSTDYGILQINSR.W       | 1898.0 | 1      | 3.99                   | 0.6366   | 635.4     | 1 19/30         |                   | 3.9         | 4.36        | 1.12            |
| 2844-2845                                                                    | R.NTDGSTDYGILQINSR.W       | 1898.0 | 1      | 4.35                   | 0.6257   | 667       | 1 21/30         |                   | 4.36        | 5.22        | 1.20            |
| 2912-2913                                                                    | K.GTDVQAWIR.G              | 1189.7 | 2      | 3.20                   | 0.3954   | 1045.9    | 1 16/16         |                   | 3.91        | 3.18        | 0.81            |
| 2922-2923                                                                    | R.CELAAAMK.R               | 1170.8 | 2      | 3.70                   | 0.4      | 2130.9    | 1 14/14         |                   | 3.73        | 3.26        | 0.87            |
| 2952-2953                                                                    | R.NTDGSTDYGILQINSR.W       | 1898.0 | 2      | 5.89                   | 0.6362   | 3793.1    | 1 29/30         |                   | 5.64        | 5.4         | 0.96            |
| 2977-2978                                                                    | R.WWCNDGR.T                | 1126.6 | 2      | 2.40                   | 0.286    | 796.6     | 1 12/12         |                   | 2.57        | 2.29        | 0.89            |
| 2992-2993                                                                    | R.WWCNDGR.T                | 1126.6 | 1      | 2.43                   | 0.3201   | 279.5     | 1 12/12         |                   | 2.18        | 1.62        | 0.74            |
| 3069-3070                                                                    | R.CELAAAMK.R               | 1170.8 | 2      | 3.05                   | 0.4154   | 2072.4    | 1 14/14         |                   | 3.14        | 2.91        | 0.93            |
| 3084-3085                                                                    | K.KIVSDGNGMNAWVAWR.N       | 2092.2 | 3      | 6.22                   | 0.4255   | 3691.1    | 1 38/60         |                   | 6.04        | 5.6         | 0.93            |
| 3114-3115                                                                    | R.WWCNDGR.T                | 1126.6 | 2      | 2.56                   | 0.2926   | 894.6     | 1 12/12         |                   | 2.72        | 2.33        | 0.86            |
| 3149-3150                                                                    | K.KIVSDGNGMNAWVAWR.N       | 2092.2 | 2      | 4.25                   | 0.3821   | 2054.4    | 1 26/30         |                   | 4.63        | 2.74        | 0.59            |
| 3249-3250                                                                    | R.WWCNDGR.T                | 1126.6 | 2      | 2.14                   | 0.2044   | 910.5     | 1 12/12         |                   | 2.51        | 1.98        | 0.79            |
| 3367-3368                                                                    | K.IVSDGNGMNAWVAWR.N        | 1820.0 | 3      | 4.15                   | 0.3451   | 2873.6    | 1 31/56         |                   | 3.87        | 2.9         | 0.75            |
| 3394-3395                                                                    | R.GYSLGNVWCAAK.F           | 1603.0 | 1      | 4.28                   | 0.6888   | 1809.2    | 1 19/22         |                   | 3.36        | 4.41        | 1.31            |
| 3422-3423                                                                    | R.GYSLGNVWCAAK.F           | 1603.0 | 2      | 5.40                   | 0.6838   | 2493.1    | 1 22/22         |                   | 5.29        | 5.51        | 1.04            |
| 3432-3433                                                                    | R.GYSLGNVWCAAK.F           | 1603.0 | 3      | 3.51                   | 0.4542   | 1470.5    | 1 26/44         |                   | 3.06        | 3.5         | 1.14            |
| 3444-3445                                                                    | K.GTDVQAWIR.G              | 1189.7 | 2      | 3.36                   | 0.3374   | 987.4     | 1 16/16         |                   | 3.5         | 2.9         | 0.83            |
| 3457-3458                                                                    | K.IVSDGNGMNAWVAWR.N        | 1820.0 | 1      | 2.40                   | 0.5603   | 634.1     | 1 20/28         |                   | 2.03        | 3.4         | 1.67            |
| 3482-3483                                                                    | K.IVSDGNGMNAWVAWR.N        | 1820.0 | 2      | 3.87                   | 0.4052   | 3000      | 1 28/28         |                   | 3.8         | 3.77        | 0.99            |
| 3577-3578                                                                    | R.GYSLGNVWCAAK.F           | 1603.0 | 2      | 5.03                   | 0.6894   | 3079.8    | 1 22/22         |                   | 5.21        | 4.61        | 0.88            |
| 3634-3635                                                                    | K.IVSDGNGMNAWVAWR.N        | 1820.0 | 2      | 4.77                   | 0.5023   | 2660.1    | 1 26/28         |                   | 4.41        | 4.1         | 0.93            |
| 3642-3643                                                                    | R.WWCNDGR.T                | 1126.6 | 2      | 2.15                   | 0.1388   | 747.2     | 1 12/12         |                   | 2.36        | 1.94        | 0.82            |
| 3734-3735                                                                    | R.GYSLGNVWCAAK.F           | 1603.0 | 2      | 4.68                   | 0.7087   | 2645.8    | 1 21/22         |                   | 4.36        | 4.66        | 1.07            |
| 3884-3885                                                                    | R.GYSLGNVWCAAK.F           | 1603.0 | 2      | 4.36                   | 0.6361   | 2598.5    | 1 22/22         |                   | 4.55        | 4.34        | 0.95            |
| 3989-3990                                                                    | R.WWCNDGR.T                | 1126.6 | 2      | 2.17                   | 0.1476   | 652.9     | 1 11/12         |                   | 2.29        | 2.29        | 1.00            |
| 4027-4028                                                                    | R.GYSLGNVWCAAK.F           | 1603.0 | 2      | 4.47                   | 0.6749   | 2379.4    | 1 21/22         |                   | 4.41        | 4.01        | 0.90            |
| 4122-4123                                                                    | R.WWCNDGR.T                | 1126.6 | 2      | 2.33                   | 0.2509   | 781.5     | 1 12/12         |                   | 2.37        | 2.36        | 1.00            |
| 4159-4160                                                                    | K.FESNFNTQATNR.N           | 1572.8 | 2      | 3.34                   | 0.3378   | 889.7     | 1 19/22         |                   | 3.6         | 2.37        | 0.66            |
| 4169-4170                                                                    | R.NLNCIPCSALLSSDITAVNCAK.K | 2763.7 | 3      | 2.76                   | 0.2692   | 124.6     | 5 21/88         |                   | 1.78        | 3.7         | 2.08            |
| 4189-4190                                                                    | K.IVSDGNGMNAWVAWR.N        | 1820.0 | 2      | 3.65                   | 0.5284   | 1506.3    | 1 22/28         |                   | 3.58        | 3.68        | 1.03            |
| 4222-4223                                                                    | R.NLNCIPCSALLSSDITAVNCAK.K | 2763.7 | 2      | 6.84                   | 0.7383   | 1610.1    | 1 27/44         |                   | 5.94        | 6.74        | 1.13            |
| 4254-4255                                                                    | R.WWCNDGR.T                | 1126.6 | 2      | 2.45                   | 0.3317   | 821.8     | 1 12/12         |                   | 2.4         | 2.16        | 0.90            |
| 4304-4305                                                                    | K.GTDVQAWIR.G              | 1189.7 | 2      | 3.52                   | 0.3646   | 1074.4    | 1 16/16         |                   | 3.34        | 3.00        | 0.90            |
| 4319-4320                                                                    | R.CELAAAMK.R               | 1170.8 | 2      | 3.06                   | 0.428    | 2039.6    | 1 14/14         |                   | 3.11        | 2.8         | 0.90            |
| 4324-4325                                                                    | R.GYSLGNVWCAAK.F           | 1603.0 | 3      | 2.67                   | 0.3112   | 988.3     | 1 22/44         |                   | 2.53        | 2.47        | 0.98            |
| 4327-4328                                                                    | R.NLNCIPCSALLSSDITAVNCAK.K | 2763.7 | 2      | 6.66                   | 0.7449   | 1492.9    | 1 25/44         |                   | 5.89        | 6.93        | 1.18            |
| 4364-4365                                                                    | R.WWCNDGR.T                | 1126.6 | 2      | 2.19                   | 0.2625   | 779.4     | 1 12/12         |                   | 2.15        | 2.35        | 1.09            |
| 4387-4388                                                                    | R.GYSLGNVWCAAK.F           | 1603.0 | 2      | 4.86                   | 0.6769   | 2472.3    | 1 21/22         |                   | 4.94        | 4.61        | 0.93            |
| 4417-4418                                                                    | K.FESNFNTQATNR.N           | 1572.8 | 2      | 4.08                   | 0.5364   | 1068      | 1 19/22         |                   | 4.01        | 3.35        | 0.84            |
| 4419-4420                                                                    | K.GTDVQAWIR.G              | 1189.7 | 2      | 4.16                   | 0.3612   | 1052.2    | 1 16/16         |                   | 4.13        | 3.68        | 0.89            |
| 4427-4428                                                                    | R.CELAAAMK.R               | 1170.8 | 2      | 3.49                   | 0.4108   | 2101      | 1 14/14         |                   | 3.39        | 3.36        | 0.99            |
| 4429-4430                                                                    | R.GYSLGNVWCAAK.F           | 1603.0 | 3      | 3.00                   | 0.323    | 1372.6    | 1 25/44         |                   | 2.92        | 2.9         | 0.99            |
| 4467-4468                                                                    | R.WWCNDGR.T                | 1126.6 | 2      | 2.25                   | 0.2453   | 785.8     | 1 12/12         |                   | 2.47        | 2.1         | 0.85            |
| 4492-4493                                                                    | R.NTDGSTDYGILQINSR.W       | 1898.0 | 3      | 3.91                   | 0.3893   | 1702.7    | 1 30/60         |                   | 3.74        | 3.15        | 0.84            |
| 4509-4510                                                                    | R.GYSLGNVWCAAK.F           | 1603.0 | 2      | 5.23                   | 0.7024   | 2616.9    | 1 22/22         |                   | 5.24        | 5.44        | 1.04            |
| 4527-4528                                                                    | K.GTDVQAWIR.G              | 1189.7 | 2      | 3.32                   | 0.3331   | 1030      | 1 16/16         |                   | 3.59        | 3.97        | 1.11            |
| 4532-4533                                                                    | K.FESNFNTQATNR.N           | 1572.8 | 2      | 4.21                   | 0.5403   | 1635.4    | 1 21/22         |                   | 4.44        | 3.99        | 0.90            |
| 4537-4538                                                                    | R.CELAAAMK.R               | 1170.8 | 2      | 3.51                   | 0.4199   | 2016.2    | 1 14/14         |                   | 3.68        | 3.46        | 0.94            |
| 4582-4583                                                                    | R.WWCNDGR.T                | 1126.6 | 2      | 2.38                   | 0.3094   | 787.3     | 1 12/12         |                   | 2.39        | 2.19        | 0.92            |
| 4642-4643                                                                    | K.GTDVQAWIR.G              | 1189.7 | 2      | 3.66                   | 0.3729   | 1004.2    | 1 16/16         |                   | 3.68        | 3.44        | 0.93            |
| 4647-4648                                                                    | R.CELAAAMK.R               | 1170.8 | 2      | 2.54                   | 0.368    | 1062.2    | 1 14/14         |                   | 2.52        | 2.58        | 0.98            |
| 4649-4650                                                                    | R.GYSLGNVWCAAK.F           | 1603.0 | 3      | 2.66                   | 0.3229   | 1235.1    | 1 23/44         |                   | 2.59        | 2.36        | 0.91            |
| 4652-4653                                                                    | R.GYSLGNVWCAAK.F           | 1603.0 | 2      | 5.47                   | 0.6919   | 2553.4    | 1 21/22         |                   | 5.38        | 5.07        | 0.94            |
| 4654-4655                                                                    | K.FESNFNTQATNR.N           | 1572.8 | 2      | 4.68                   | 0.5439   | 1737.2    | 1 22/22         |                   | 4.45        | 3.99        | 0.90            |
| 4702-4703                                                                    | R.NTDGSTDYGILQINSR.W       | 1898.0 | 2      | 6.30                   | 0.5992   | 3015.3    | 1 28/30         |                   | 5.67        | 6.1         | 1.08            |
| 4734-4735                                                                    | K.IVSDGNGMNAWVAWR.N        | 1820.0 | 2      | 4.33                   | 0.5937   | 2526.2    | 1 26/28         |                   | 4.51        | 4.29        | 0.95            |
| 4754-4755                                                                    | K.GTDVQAWIR.G              | 1189.7 | 2      | 3.36                   | 0.3274   | 940       | 1 16/16         |                   | 3.93        | 3.4         | 0.87            |
| 4762-4763                                                                    | R.CELAAAMK.R               | 1170.8 | 2      | 3.51                   | 0.4498   | 2194.7    | 1 14/14         |                   | 3.65        | 3.2         | 0.88            |
| 4764-4765                                                                    | R.GYSLGNVWCAAK.F           | 1603.0 | 3      | 3.37                   | 0.4058   | 1520.9    | 1 26/44         |                   | 3.14        | 3.25        | 1.04            |
| 4774-4775                                                                    | K.FESNFNTQATNR.N           | 1572.8 | 2      | 4.78                   | 0.5077   | 2036.2    | 1 21/22         |                   | 4.8         | 4.72        | 0.98            |
| 4777-4778                                                                    | R.GYSLGNVWCAAK.F           | 1603.0 | 2      | 5.34                   | 0.6839   | 1659.3    | 1 21/22         |                   | 5.32        | 5.32        | 1.00            |
| 4802-4803                                                                    | R.WWCNDGR.T                | 1126.6 | 2      | 2.13                   | 0.2635   | 720.5     | 1 12/12         |                   | 2.15        | 1.9         | 0.88            |
| 4842-4843                                                                    | K.KIVSDGNGMNAWVAWR.N       | 2092.2 | 3      | 4.15                   | 0.3549   | 2797.8    | 1 33/60         |                   | 4.14        | 2.88        | 0.70            |
| 4857-4858                                                                    | K.GTDVQAWIR.G              | 1189.7 | 2      | 3.34                   | 0.3603   | 1067.3    | 1 16/16         |                   | 3.4         | 3.35        | 0.99            |
| 4867-4868                                                                    | R.GYSLGNVWCAAK.F           | 1603.0 | 3      | 2.66                   | 0.2188   | 1113.2    | 1 22/44         |                   | 2.04        | 2.85        | 1.40            |
| 4869-4870                                                                    | R.CELAAAMK.R               | 1170.8 | 2      | 3.24                   | 0.4271   | 2033.9    | 1 14/14         |                   | 3.31        | 3.21        | 0.97            |
| 4879-4880                                                                    | K.FESNFNTQATNR.N           | 1572.8 | 2      | 5.02                   | 0.5286   | 1856.5    | 1 21/22         |                   | 4.91        | 4.24        | 0.86            |
| 4902-4903                                                                    | R.GYSLGNVWCAAK.F           | 1603.0 | 2      | 5.36                   | 0.6795   | 2392      | 1 22/22         |                   | 5.36        | 5.27        | 0.98            |
| 4907-4908                                                                    | R.WWCNDGR.T                | 1126.6 | 2      | 2.38                   | 0.2954   | 787       | 1 12/12         |                   | 2.54        | 2.38        | 0.94            |
| 4912-4913                                                                    | R.NTDGSTDYGILQINSR.W       | 1898.0 | 3      | 3.85                   | 0.319    | 1602.8    | 1 28/60         |                   | 3.78        | 3.05        | 0.81            |
| 4927-4928                                                                    | R.NLNCIPCSALLSSDITAVNCAK.K | 2763.7 | 3      | 5.68                   | 0.5485   | 2109.1    | 1 39/88         |                   | 5.57        | 5.81        | 1.04            |
| 4962-4963                                                                    | K.GTDVQAWIR.G              | 1189.7 | 2      | 3.23                   | 0.3636   | 1069      | 1 16/16         |                   | 3.33        | 3.66        | 1.10            |
| 4972-4973                                                                    | R.CELAAAMK.R               | 1170.8 | 2      | 3.32                   | 0.385    | 1995.1    | 1 14/14         |                   | 3.44        | 3.19        | 0.93            |
| 4977-4978                                                                    | R.GYSLGNVWCAAK.F           | 1603.0 | 3      | 3.29                   | 0.2177   | 1187.7    | 1 24/44         |                   | 3           | 3.05        | 1.02            |
| 5004-5005                                                                    | K.FESNFNTQATNR.N           | 1572.8 | 2      | 4.97                   | 0.5133   | 1778      | 1 21/22         |                   | 4.74        | 4.46        | 0.94            |
| 5007-5008                                                                    | R.GYSLGNVWCAAK.F           | 1603.0 |        |                        |          |           |                 |                   |             |             |                 |

|           |                              |        |   |      |        |        |         |      |      |      |
|-----------|------------------------------|--------|---|------|--------|--------|---------|------|------|------|
| 5287-5288 | R.CELAAAMK.R                 | 1170.8 | 2 | 3.39 | 0.4221 | 2130.4 | 1 14/14 | 3.34 | 3.03 | 0.91 |
| 5304-5305 | K.KIVSDGNGMNAWVAWR.N         | 2092.2 | 3 | 4.00 | 0.4148 | 1926.7 | 1 31/60 | 3.91 |      | 0.00 |
| 5334-5335 | R.GYSLGNWVCAAK.F             | 1603.0 | 2 | 5.12 | 0.6794 | 1973.4 | 1 22/22 | 5.15 | 5.3  | 1.03 |
| 5354-5355 | K.FESNFNTQATNR.N             | 1572.8 | 2 | 5.02 | 0.5267 | 1785.6 | 1 21/22 | 4.84 | 4.56 | 0.94 |
| 5374-5375 | K.GTDVQAWIR.G                | 1189.7 | 2 | 3.15 | 0.3705 | 1064.3 | 1 16/16 | 3.41 | 3.22 | 0.94 |
| 5384-5385 | K.IVSDGNGMNAWVAWR.N          | 1820.0 | 2 | 5.02 | 0.5063 | 2820.4 | 1 27/28 | 4.89 | 4.16 | 0.85 |
| 5387-5388 | R.GYSLGNWVCAAK.F             | 1603.0 | 3 | 2.76 | 0.2318 | 976    | 1 22/44 | 2.06 | 2.53 | 1.23 |
| 5389-5390 | R.CELAAAMK.R                 | 1170.8 | 2 | 3.30 | 0.4073 | 2018.1 | 1 14/14 | 3.36 | 2.88 | 0.86 |
| 5399-5400 | R.NTDGSTDYGILQINSR.W         | 1898.0 | 3 | 3.82 | 0.303  | 1123.6 | 1 30/60 | 3.65 | 3.1  | 0.85 |
| 5432-5433 | R.WWCNDGR.T                  | 1126.6 | 2 | 2.09 | 0.2057 | 634    | 1 12/12 | 2.1  | 1.75 | 0.83 |
| 5437-5438 | R.NLNCNIPCSALLSSDITASVNCAK.K | 2763.7 | 3 | 5.61 | 0.5516 | 1916.7 | 1 37/88 | 5.42 | 5.55 | 1.02 |
| 5454-5455 | K.FESNFNTQATNR.N             | 1572.8 | 2 | 4.80 | 0.4807 | 1944.5 | 1 22/22 | 4.87 | 4.68 | 0.96 |
| 5467-5468 | K.GTDVQAWIR.G                | 1189.7 | 2 | 3.37 | 0.3573 | 912.8  | 2 15/16 | 3.35 | 3.28 | 0.98 |
| 5482-5483 | R.CELAAAMK.R                 | 1170.8 | 2 | 3.33 | 0.418  | 1973.2 | 1 14/14 | 3.4  | 2.9  | 0.85 |
| 5494-5495 | K.IVSDGNGMNAWVAWR.N          | 1820.0 | 2 | 5.13 | 0.5168 | 2717.8 | 1 27/28 | 5.1  | 4.49 | 0.88 |
| 5502-5503 | R.NTDGSTDYGILQINSR.W         | 1898.0 | 3 | 3.52 | 0.3607 | 675.9  | 1 27/60 | 3.26 | 3.17 | 0.97 |
| 5507-5508 | R.GYSLGNWVCAAK.F             | 1603.0 | 2 | 4.96 | 0.6974 | 1742.1 | 1 21/22 | 4.98 | 5.22 | 1.05 |
| 5567-5568 | K.GTDVQAWIR.G                | 1189.7 | 2 | 3.47 | 0.3675 | 1121.1 | 1 16/16 | 3.58 | 3.35 | 0.94 |
| 5579-5580 | K.FESNFNTQATNR.N             | 1572.8 | 2 | 5.07 | 0.522  | 1520.8 | 1 22/22 | 4.87 | 4.44 | 0.91 |
| 5582-5583 | R.CELAAAMK.R                 | 1170.8 | 2 | 3.38 | 0.4246 | 2116.6 | 1 14/14 | 3.48 | 3.29 | 0.95 |
| 5584-5585 | R.GYSLGNWVCAAK.F             | 1603.0 | 3 | 3.14 | 0.3349 | 1151.9 | 1 23/44 | 3.06 | 3.44 | 1.12 |
| 5609-5610 | R.GYSLGNWVCAAK.F             | 1603.0 | 2 | 5.08 | 0.6977 | 1991.3 | 1 21/22 | 5.23 | 5.1  | 0.98 |
| 5614-5615 | K.IVSDGNGMNAWVAWR.N          | 1820.0 | 2 | 5.09 | 0.5063 | 2791.7 | 1 27/28 | 5.21 | 4.62 | 0.89 |
| 5647-5648 | R.NTDGSTDYGILQINSR.W         | 1898.0 | 3 | 3.34 | 0.2493 | 340.5  | 2 22/60 | 3.33 | 1.98 | 0.59 |
| 5662-5663 | K.GTDVQAWIR.G                | 1189.7 | 2 | 3.37 | 0.3593 | 1093.9 | 1 16/16 | 3.62 | 3.3  | 0.91 |
| 5674-5675 | K.FESNFNTQATNR.N             | 1572.8 | 2 | 4.77 | 0.5527 | 1058.8 | 1 21/22 | 4.67 | 4.02 | 0.86 |
| 5677-5678 | R.CELAAAMK.R                 | 1170.8 | 2 | 3.57 | 0.4167 | 2116.8 | 1 14/14 | 3.55 | 3.28 | 0.92 |
| 5679-5680 | R.GYSLGNWVCAAK.F             | 1603.0 | 3 | 2.91 | 0.4053 | 1115   | 1 24/44 | 2.73 | 2.8  | 1.03 |
| 5717-5718 | R.WWCNDGR.T                  | 1126.6 | 2 | 2.05 | 0.177  | 627.7  | 1 11/12 | 2    | 2.39 | 1.20 |
| 5722-5723 | R.NLNCNIPCSALLSSDITASVNCAK.K | 2763.7 | 3 | 5.82 | 0.5791 | 1511.1 | 1 35/88 | 5.51 | 6.45 | 1.17 |
| 5747-5748 | R.NTDGSTDYGILQINSR.W         | 1898.0 | 3 | 3.12 | 0.2413 | 408.5  | 2 24/60 | 3.2  | 2.16 | 0.68 |
| 5752-5753 | K.GTDVQAWIR.G                | 1189.7 | 2 | 3.46 | 0.2647 | 1042.2 | 1 16/16 | 3.95 | 3.24 | 0.82 |
| 5777-5778 | R.CELAAAMK.R                 | 1170.8 | 2 | 3.53 | 0.425  | 2124.8 | 1 14/14 | 3.47 | 3.27 | 0.94 |
| 5787-5788 | K.FESNFNTQATNR.N             | 1572.8 | 2 | 4.14 | 0.5248 | 840.3  | 1 21/22 | 4.62 | 2.81 | 0.61 |
| 5799-5800 | K.KIVSDGNGMNAWVAWR.N         | 2092.2 | 3 | 4.13 | 0.368  | 989.9  | 1 34/60 | 4.05 | 2.72 | 0.67 |
| 5814-5815 | R.NLNCNIPCSALLSSDITASVNCAK.K | 2763.7 | 3 | 4.55 | 0.5329 | 917.5  | 1 32/88 | 4.24 | 4.59 | 1.08 |
| 5819-5820 | R.WWCNDGR.T                  | 1126.6 | 2 | 2.08 | 0.1599 | 782.4  | 1 12/12 | 2.14 | 2.21 | 1.03 |
| 5854-5855 | K.GTDVQAWIR.G                | 1189.7 | 2 | 3.87 | 0.3351 | 1093.3 | 1 16/16 | 3.88 | 3.34 | 0.86 |
| 5864-5865 | R.GYSLGNWVCAAK.F             | 1603.0 | 3 | 3.07 | 0.3665 | 1410.6 | 1 24/44 | 2.65 | 3.04 | 1.15 |
| 5879-5880 | R.CELAAAMK.R                 | 1170.8 | 2 | 3.45 | 0.4231 | 2037.6 | 1 14/14 | 3.56 | 3.18 | 0.89 |
| 5887-5888 | K.FESNFNTQATNR.N             | 1572.8 | 2 | 3.80 | 0.485  | 575    | 1 21/22 | 4.96 | 1.3  | 0.28 |
| 5912-5913 | R.NLNCNIPCSALLSSDITASVNCAK.K | 2763.7 | 3 | 5.11 | 0.545  | 1131.6 | 1 33/88 | 5.03 | 5.03 | 0.98 |
| 5922-5923 | R.WWCNDGR.T                  | 1126.6 | 2 | 2.02 | 0.1085 | 713.9  | 1 12/12 | 2.12 | 1.79 | 0.84 |
| 5942-5943 | R.NTDGSTDYGILQINSR.W         | 1898.0 | 3 | 3.02 | 0.1325 | 309.9  | 1 24/60 | 2.96 | 2.41 | 0.81 |
| 5952-5953 | K.GTDVQAWIR.G                | 1189.7 | 2 | 3.60 | 0.3476 | 905.1  | 1 16/16 | 3.52 | 3.25 | 0.92 |
| 5974-5975 | R.GYSLGNWVCAAK.F             | 1603.0 | 3 | 3.14 | 0.3534 | 886.3  | 1 21/44 | 2.96 | 2.56 | 0.86 |
| 5987-5988 | K.FESNFNTQATNR.N             | 1572.8 | 2 | 3.12 | 0.4405 | 495.2  | 1 21/22 | 4.77 | 1.22 | 0.26 |
| 5999-6000 | R.GYSLGNWVCAAK.F             | 1603.0 | 2 | 4.79 | 0.6848 | 1079.8 | 1 22/22 | 4.46 | 5.11 | 1.15 |
| 6002-6003 | R.CELAAAMK.R                 | 1170.8 | 2 | 3.48 | 0.4162 | 2078.3 | 1 14/14 | 3.44 | 3.28 | 0.95 |
| 6012-6013 | R.NLNCNIPCSALLSSDITASVNCAK.K | 2763.7 | 3 | 6.14 | 0.5727 | 1820.4 | 1 35/88 | 5.84 | 5.85 | 1.00 |
| 6024-6025 | R.WWCNDGR.T                  | 1126.6 | 2 | 2.05 | 0.2227 | 708.5  | 1 12/12 | 2.12 | 1.86 | 0.88 |
| 6042-6043 | R.NTDGSTDYGILQINSR.W         | 1898.0 | 3 | 3.15 | 0.2921 | 365.5  | 1 22/60 | 2.92 | 2.46 | 0.84 |
| 6052-6053 | K.GTDVQAWIR.G                | 1189.7 | 2 | 3.13 | 0.3035 | 1033   | 1 16/16 | 3.53 | 2.87 | 0.81 |
| 6089-6090 | K.FESNFNTQATNR.N             | 1572.8 | 2 | 2.75 | 0.4521 | 348.2  | 1 20/22 | 4.71 | 1.21 | 0.26 |
| 6112-6113 | R.NLNCNIPCSALLSSDITASVNCAK.K | 2763.7 | 3 | 5.07 | 0.5709 | 1403.4 | 1 37/88 | 4.96 | 4.69 | 0.95 |
| 6124-6125 | R.CELAAAMK.R                 | 1170.8 | 2 | 3.34 | 0.4511 | 2088.5 | 1 14/14 | 3.32 | 3.14 | 0.95 |
| 6142-6143 | R.NTDGSTDYGILQINSR.W         | 1898.0 | 3 | 2.68 | 0.2035 | 189.4  | 4 20/60 | 2.65 | 1.54 | 0.58 |
| 6164-6165 | K.GTDVQAWIR.G                | 1189.7 | 2 | 3.38 | 0.3584 | 1087.6 | 1 16/16 | 3.66 | 3.27 | 0.89 |
| 6169-6170 | R.GYSLGNWVCAAK.F             | 1603.0 | 2 | 4.25 | 0.6299 | 1514.4 | 1 21/22 | 4.8  | 4.8  | 1.13 |
| 6189-6190 | K.FESNFNTQATNR.N             | 1572.8 | 2 | 2.54 | 0.4319 | 304.6  | 1 20/22 | 4.71 | 0.88 | 0.19 |
| 6209-6210 | K.KIVSDGNGMNAWVAWR.N         | 2092.2 | 3 | 2.91 | 0.3978 | 295.6  | 1 27/60 | 3.65 | 0.92 | 0.25 |
| 6217-6218 | R.NLNCNIPCSALLSSDITASVNCAK.K | 2763.7 | 3 | 5.12 | 0.542  | 1124   | 1 35/88 | 4.7  | 4.72 | 1.00 |
| 6262-6263 | K.GTDVQAWIR.G                | 1189.7 | 2 | 3.44 | 0.3349 | 1126.5 | 1 16/16 | 3.56 | 3.28 | 0.92 |
| 6274-6275 | R.CELAAAMK.R                 | 1170.8 | 2 | 3.39 | 0.4283 | 2047.3 | 1 14/14 | 3.31 | 3.2  | 0.97 |
| 6289-6290 | K.FESNFNTQATNR.N             | 1572.8 | 2 | 2.44 | 0.5102 | 291.7  | 1 20/22 | 4.81 | 0.53 | 0.11 |
| 6319-6320 | R.NLNCNIPCSALLSSDITASVNCAK.K | 2763.7 | 3 | 4.67 | 0.544  | 767.1  | 1 32/88 | 4.63 | 4.87 | 1.05 |
| 6347-6348 | R.WWCNDGR.T                  | 1126.6 | 2 | 2.05 | 0.1132 | 501.7  | 1 11/12 | 2.05 | 2.09 | 1.02 |
| 6424-6425 | R.NLNCNIPCSALLSSDITASVNCAK.K | 2763.7 | 3 | 5.34 | 0.5672 | 1326.3 | 1 35/88 | 5.17 | 5.29 | 1.02 |
| 6452-6453 | R.CELAAAMK.R                 | 1170.8 | 2 | 3.40 | 0.4089 | 1960.7 | 1 14/14 | 3.37 | 3.13 | 0.93 |
| 6467-6468 | K.GTDVQAWIR.G                | 1189.7 | 2 | 3.55 | 0.3292 | 1082.3 | 1 16/16 | 3.59 | 3.47 | 0.97 |
| 6537-6538 | R.CELAAAMK.R                 | 1170.8 | 2 | 3.51 | 0.4299 | 2060.8 | 1 14/14 | 3.47 | 3.14 | 0.90 |
| 6549-6550 | K.GTDVQAWIR.G                | 1189.7 | 2 | 3.66 | 0.3382 | 1023.1 | 1 16/16 | 3.74 | 3.59 | 0.96 |
| 6552-6553 | R.NTDGSTDYGILQINSR.W         | 1898.0 | 3 | 3.65 | 0.2466 | 1504.5 | 1 29/60 | 3.87 | 2.48 | 0.64 |
| 6562-6563 | K.FESNFNTQATNR.N             | 1572.8 | 2 | 4.97 | 0.5086 | 1786   | 1 22/22 | 4.89 | 4.24 | 0.87 |
| 6587-6588 | R.NLNCNIPCSALLSSDITASVNCAK.K | 2763.7 | 3 | 5.22 | 0.5692 | 1625.2 | 1 35/88 | 5.03 | 4.96 | 0.97 |
| 6617-6618 | R.WWCNDGR.T                  | 1126.6 | 2 | 2.16 | 0.251  | 745.5  | 1 12/12 | 2.1  | 2.27 | 1.08 |
| 6619-6620 | R.CELAAAMK.R                 | 1170.8 | 2 | 3.32 | 0.4075 | 1876.3 | 1 14/14 | 3.47 | 3.14 | 0.90 |
| 6622-6623 | K.GTDVQAWIR.G                | 1189.7 | 2 | 3.18 | 0.3994 | 1124.2 | 1 16/16 | 3.94 | 3.11 | 0.79 |
| 6637-6638 | K.FESNFNTQATNR.N             | 1572.8 | 2 | 5.19 | 0.5252 | 2104.3 | 1 22/22 | 4.92 | 4.66 | 0.95 |
| 6702-6703 | K.FESNFNTQATNR.N             | 1572.8 | 2 | 4.97 | 0.5189 | 2166.7 | 1 22/22 | 4.85 | 4.83 | 1.00 |
| 6769-6770 | K.FESNFNTQATNR.N             | 1572.8 | 2 | 5.00 | 0.4988 | 2498.3 | 1 22/22 | 4.88 | 4.57 | 0.94 |
| 6774-6775 | K.FESNFNTQATNR.N             | 1572.8 | 3 | 3.40 | 0.3554 | 746.5  | 1 22/44 | 3.13 | 3.33 | 1.06 |
| 6874-6875 | K.GTDVQAWIR.G                | 1189.7 | 2 | 3.50 | 0.3535 | 1094.7 | 1 16/16 | 3.82 | 3.32 | 0.87 |
| 6887-6888 | R.WWCNDGR.T                  | 1126.6 | 2 | 2.55 | 0.2832 | 812.3  | 1 12/12 | 2.54 | 2.32 | 0.91 |
