# Supplementary material
Source: PubMed Central journal article supplement (PMC3183836)
Supplement: NIHMS324680-supplement-supp_table_3.pdf [file NIHMS324680-supplement-supp_table_3.pdf]

| Reference    | File_Scan(s) | Sequence                                | MH+    | Charge | Xcorr (merged CID/PQD) | Score | Accession | Peptides (Hits) | Count | Xcorr (CID) | Xcorr (PQD) | Ratio (PQD/CID) |
|--------------|--------------|-----------------------------------------|--------|--------|------------------------|-------|-----------|-----------------|-------|-------------|-------------|-----------------|
|              |              |                                         |        |        |                        |       |           | 51 (51 0 0 0 0) |       |             |             |                 |
| gjl114939.sp |              | BGAL_ECOLI Beta-galactosidase (Lactase) |        |        |                        |       |           |                 |       |             |             |                 |
| 1437-1438    |              | R.TDRPSQQLR.S                           | 1244.7 | 3      | 3.11                   | 0.37  | 471.1     | 2/17/32         | 3.12  | 2.85        | 0.91        |                 |
| 1857-1858    |              | K.QNNFNVA.R.C                           | 1106.6 | 2      | 2.52                   | 0.13  | 1020.7    | 1/14/14         | 2.79  | 2.58        | 0.92        |                 |
| 1867-1868    |              | R.TPHPALTEAK.H                          | 1352.9 | 2      | 2.75                   | 0.46  | 344.2     | 1/14/18         | 3.23  | 3.00        | 0.93        |                 |
| 1994-1995    |              | R.YSQQLMETSHR.H                         | 1651.9 | 3      | 5.05                   | 0.54  | 1844.2    | 1/21/22         | 5.18  | 4.53        | 0.87        |                 |
| 2219-2220    |              | R.VVGYGQDSR.L                           | 1211.7 | 2      | 2.97                   | 0.43  | 1226.6    | 1/16/16         | 3.23  | 3.11        | 0.96        |                 |
| 2222-2223    |              | R.FNDDFSR.A                             | 1044.5 | 2      | 2.52                   | 0.33  | 1210.7    | 1/12/12         | 2.19  | 2.52        | 1.15        |                 |
| 2284-2285    |              | R.RDWENPGVTQLNR.L                       | 1728.9 | 2      | 4.25                   | 0.44  | 1002.1    | 1/21/24         | 4.67  | 3.01        | 0.64        |                 |
| 2434-2435    |              | R.APLDNDIGVSEATR.I                      | 1601.9 | 2      | 4.16                   | 0.62  | 1836.9    | 1/24/26         | 3.76  | 3.92        | 1.04        |                 |
| 2512-2513    |              | R.DWENPGVTQLNR.L                        | 1572.8 | 3      | 4.23                   | 0.41  | 1945.0    | 1/22/22         | 4     | 3.68        | 0.97        |                 |
| 2537-2538    |              | K.TLFSR.K                               | 860.6  | 2      | 2.28                   | 0.15  | 550.1     | 2/10/10         | 2.23  | 2.52        | 1.13        |                 |
| 2542-2543    |              | R.MSGIFR.D                              | 854.5  | 2      | 2.05                   | 0.13  | 334.9     | 1/8/10          | 2.08  | 2.06        | 0.99        |                 |
| 2579-2580    |              | K.HQQQFFOFR.L                           | 1409.8 | 3      | 3.69                   | 0.49  | 941.8     | 1/19/32         | 3.66  | 3.51        | 0.96        |                 |
| 2587-2588    |              | K.HQQQFFOFR.L                           | 1409.8 | 2      | 2.65                   | 0.41  | 979.0     | 1/16/16         | 2.58  | 2.98        | 1.15        |                 |
| 2657-2658    |              | R.VDEDDPPAVPK.W                         | 1630.0 | 2      | 3.98                   | 0.51  | 2147.0    | 1/22/22         | 3.81  | 4.63        | 1.21        |                 |
| 2659-2660    |              | R.DVSLHKHTQISDFHVATR.F                  | 2553.5 | 3      | 5.48                   | 0.55  | 1460.4    | 1/33/76         | 5.5   | 5.79        | 1.05        |                 |
| 2739-2740    |              | R.GDFQFNISR.Y                           | 1227.7 | 2      | 3.83                   | 0.47  | 900.5     | 1/16/16         | 3.77  | 3.55        | 0.94        |                 |
| 2757-2758    |              | R.LLAHPFASWR.N                          | 1396.8 | 3      | 2.78                   | 0.49  | 804.8     | 1/19/20         | 2.92  | 3.05        | 1.04        |                 |
| 2797-2798    |              | R.IDPNAWYER.W                           | 1243.7 | 2      | 2.58                   | 0.37  | 712.7     | 1/16/16         | 2.66  | 2.70        | 1.01        |                 |
| 2822-2823    |              | K.YWQAFR.Q                              | 1014.6 | 2      | 2.02                   | 0.27  | 565.9     | 1/10/10         | 2.07  | 2.06        | 0.99        |                 |
| 2842-2843    |              | R.LLAHPFASWR.N                          | 1396.8 | 3      | 2.83                   | 0.31  | 307.4     | 2/16/40         | 2.57  | 2.83        | 1.10        |                 |
| 2872-2873    |              | K.QLLTLRQDOFTR.A                        | 1632.0 | 2      | 2.86                   | 0.38  | 515.8     | 1/22/44         | 2.71  | 2.93        | 1.08        |                 |
| 2892-2893    |              | R.WLPAMSER.V                            | 1133.6 | 2      | 2.23                   | 0.23  | 656.6     | 1/14/14         | 2.38  | 2.25        | 0.94        |                 |
| 3022-3023    |              | K.YDENGNPWSAYGGDGTDPNDR.Q               | 2591.1 | 3      | 6.88                   | 0.75  | 2510.7    | 1/28/42         | 6.29  | 6.33        | 1.01        |                 |
| 3102-3103    |              | R.LAVMVL.R.W                            | 945.7  | 2      | 3.26                   | 0.11  | 797.3     | 1/12/12         | 3.41  | 2.85        | 0.83        |                 |
| 3137-3138    |              | R.QSGFLSOMWIGDKK.Q                      | 2057.3 | 3      | 5.49                   | 0.45  | 3220.5    | 1/36/52         | 5.26  | 5.86        | 1.11        |                 |
| 3177-3178    |              | R.WSDGSYLEDDMWR.M                       | 1931.9 | 2      | 4.97                   | 0.62  | 2178.4    | 1/26/26         | 5.31  | 5.15        | 0.97        |                 |
| 3187-3188    |              | R.WSDGSYLEDDMWR.M                       | 1931.9 | 3      | 4.59                   | 0.39  | 1690.7    | 1/27/52         | 4.39  | 3.68        | 0.84        |                 |
| 3232-3233    |              | R.VVQPNATAVSEAGHISAWQQWR.L              | 2666.4 | 3      | 6.90                   | 0.62  | 1638.0    | 1/36/84         | 6.39  | 6.62        | 1.04        |                 |
| 3269-3270    |              | R.VVWLSLGPQENPDR.L                      | 1902.0 | 3      | 5.71                   | 0.54  | 2217.3    | 1/25/28         | 5.29  | 5.35        | 1.01        |                 |
| 3277-3278    |              | R.IGLNCQLAQVAER.V                       | 1605.0 | 2      | 4.63                   | 0.55  | 1685.4    | 1/21/24         | 4.76  | 4.94        | 1.04        |                 |
| 3294-3295    |              | R.YGLYVVDENIETHGMVPMNR.L                | 2552.3 | 3      | 6.92                   | 0.52  | 3814.0    | 1/42/80         | 6.44  | 7.15        | 1.11        |                 |
| 3497-3498    |              | R.AVVVELHTADGTLAEACDVGFR.E              | 2606.4 | 3      | 7.66                   | 0.66  | 2740.8    | 1/41/88         | 7.11  | 7.44        | 1.05        |                 |
| 3502-3503    |              | R.QFCMGLVFADR.T                         | 1590.9 | 2      | 4.07                   | 0.40  | 1884.2    | 1/22/22         | 4.36  | 3.33        | 0.76        |                 |
| 3529-3530    |              | R.LSGQTIEVTSEYLF.R.H                    | 1887.1 | 3      | 6.36                   | 0.58  | 2667.0    | 1/26/28         | 6.24  | 6.33        | 1.01        |                 |
| 3534-3535    |              | R.LSGQTIEVTSEYLF.R.H                    | 1887.1 | 3      | 5.03                   | 0.48  | 1933.5    | 1/30/56         | 4.49  | 3.68        | 0.82        |                 |
| 3554-3555    |              | R.VTVSLWQGETQVAVGTAFFGGEIIDER.G         | 2991.6 | 2      | 6.22                   | 0.75  | 2201.6    | 1/32/52         | 5.5   | 5.52        | 1.00        |                 |
| 3664-3665    |              | R.AVLEAEVQMGCELR.D                      | 1738.0 | 2      | 5.45                   | 0.63  | 3942.1    | 1/26/26         | 5.47  | 5.09        | 0.93        |                 |
| 3677-3678    |              | R.IENGLLLNCKPLLR.G                      | 2064.4 | 3      | 4.44                   | 0.39  | 1708.0    | 1/31/60         | 4.15  | 4.08        | 0.98        |                 |
| 3812-3813    |              | R.AVLEAEVQMGCELR.D                      | 1738.0 | 2      | 4.53                   | 0.44  | 1825.3    | 1/23/26         | 4.57  | 4.47        | 0.98        |                 |
| 3844-3845    |              | R.IDSGSQMAMTVDEVASDTPHPAR.I             | 2610.4 | 3      | 3.39                   | 0.23  | 428.8     | 2/6/92          | 3.56  | 2.22        | 0.62        |                 |
| 3934-3935    |              | R.LPSEFDLSAFLR.A                        | 1538.9 | 2      | 4.23                   | 0.59  | 992.5     | 1/21/22         | 4.28  | 3.71        | 0.87        |                 |
| 3949-3950    |              | R.LPSEFDLSAFLR.A                        | 1538.9 | 3      | 4.46                   | 0.40  | 1231.7    | 1/24/44         | 4.12  | 3.28        | 0.79        |                 |
| 3957-3958    |              | -MTMIDSLAVLQR.R                         | 1722.0 | 3      | 2.63                   | 0.37  | 614.1     | 1/15/26         | 2.64  | 2.20        | 0.83        |                 |
| 3967-3968    |              | K.QLIELPELPQESAGQLWLVTR.V               | 2661.5 | 3      | 6.87                   | 0.61  | 2579.9    | 1/39/84         | 5.94  | 6.32        | 1.06        |                 |
| 3972-3973    |              | K.QLIELPELPQESAGQLWLVTR.V               | 2661.5 | 3      | 5.05                   | 0.57  | 1724.0    | 1/30/42         | 4.48  | 4.84        | 1.08        |                 |
| 4047-4048    |              | R.WSDGSYLEDDMWR.M                       | 1931.9 | 3      | 4.04                   | 0.56  | 1411.5    | 1/24/26         | 3.83  | 4.32        | 1.13        |                 |
| 4099-4100    |              | R.LQGGFVWDWVDOSLKY.Y                    | 2179.3 | 3      | 7.81                   | 0.57  | 4176.5    | 1/29/30         | 7.39  | 7.35        | 0.99        |                 |
| 4114-4115    |              | R.LTAACFDRWIDPLSDMTPYVFPSENGLR.C        | 3567.8 | 3      | 8.34                   | 0.64  | 1655.7    | 1/43/112        | 7.77  | 7.40        | 0.95        |                 |
| 4132-4133    |              | R.LQGGFVWDWVDOSLKY.Y                    | 2179.3 | 3      | 4.66                   | 0.37  | 1020.4    | 1/26/60         | 4.26  | 4.26        | 1.00        |                 |
| 4349-4350    |              | R.VVQPNATAVSEAGHISAWQQWR.L              | 2666.4 | 3      | 3.28                   | 0.34  | 450.4     | 1/26/84         | 3.12  | 3.20        | 1.02        |                 |
| 6707-6708    |              | R.TDRPSQQLR.S                           | 1244.7 | 3      | 2.60                   | 0.18  | 658.9     | 1/17/32         | 2.21  | 2.83        | 1.28        |                 |

Reference Score Accession Peptides (Hits)







|             |                             |        |   |      |      |        |         |      |      |      |
|-------------|-----------------------------|--------|---|------|------|--------|---------|------|------|------|
| 5542 - 5543 | R.CELAAAMK.R                | 1170.8 | 2 | 3.53 | 0.30 | 2118.1 | 1 14/14 | 3.53 | 3.34 | 0.94 |
| 5557 - 5558 | R.NTDGSTDYGILQINSR.W        | 1898.0 | 3 | 3.73 | 0.32 | 976.0  | 1 29/60 | 3.78 | 3.01 | 0.79 |
| 5572 - 5573 | K.GTDVQAWIR.G               | 1189.7 | 2 | 3.62 | 0.34 | 1056.2 | 1 16/16 | 3.63 | 3.78 | 1.04 |
| 5592 - 5593 | R.NLNCNPCSALLSSDITASVNCAK.K | 2763.7 | 3 | 5.79 | 0.50 | 1894.3 | 1 35/88 | 5.78 | 4.08 | 0.71 |
| 5602 - 5603 | R.GYSLGNVWVCAAK.F           | 1603.0 | 3 | 5.10 | 0.64 | 1908.1 | 1 21/22 | 5.17 | 5.21 | 1.01 |
| 5612 - 5613 | R.WWCNDGR.T                 | 1126.6 | 3 | 2.23 | 0.22 | 808.9  | 1 12/12 | 2.32 | 2.31 | 0.99 |
| 5634 - 5635 | R.CELAAAMK.R                | 1170.8 | 3 | 3.49 | 0.31 | 2192.0 | 1 14/14 | 3.46 | 3.45 | 1.00 |
| 5652 - 5653 | R.NTDGSTDYGILQINSR.W        | 1898.0 | 3 | 3.53 | 0.27 | 290.0  | 4 23/60 | 3.24 | 2.08 | 0.64 |
| 5662 - 5663 | K.GTDVQAWIR.G               | 1189.7 | 2 | 3.71 | 0.36 | 1084.9 | 1 16/16 | 3.73 | 3.73 | 1.00 |
| 5677 - 5678 | R.NLNCNPCSALLSSDITASVNCAK.K | 2763.7 | 3 | 6.03 | 0.59 | 1773.3 | 1 36/88 | 5.6  | 6.22 | 1.11 |
| 5687 - 5688 | R.GYSLGNVWVCAAK.F           | 1603.0 | 3 | 3.03 | 0.26 | 1063.7 | 1 22/44 | 2.71 | 3.11 | 1.15 |
| 5692 - 5693 | R.WWCNDGR.T                 | 1126.6 | 2 | 2.11 | 0.15 | 790.0  | 1 12/12 | 2.19 | 2.46 | 1.12 |
| 5719 - 5720 | R.CELAAAMK.R                | 1170.8 | 2 | 3.53 | 0.31 | 2097.1 | 1 14/14 | 3.48 | 3.45 | 0.99 |
| 5737 - 5738 | R.NTDGSTDYGILQINSR.W        | 1898.0 | 3 | 3.43 | 0.24 | 431.1  | 2 26/60 | 2.87 | 2.90 | 1.01 |
| 5754 - 5755 | K.GTDVQAWIR.G               | 1189.7 | 2 | 3.74 | 0.38 | 1085.0 | 1 16/16 | 3.65 | 3.55 | 0.97 |
| 5762 - 5763 | R.NLNCNPCSALLSSDITASVNCAK.K | 2763.7 | 3 | 5.50 | 0.52 | 1510.9 | 1 33/88 | 5.46 | 5.54 | 1.01 |
| 5777 - 5778 | R.WWCNDGR.T                 | 1126.6 | 2 | 2.06 | 0.20 | 802.1  | 1 12/12 | 2.25 | 2.33 | 1.03 |
| 5787 - 5788 | R.GYSLGNVWVCAAK.F           | 1603.0 | 3 | 3.02 | 0.31 | 1097.6 | 1 23/44 | 2.88 | 3.01 | 1.04 |
| 5837 - 5838 | R.NTDGSTDYGILQINSR.W        | 1898.0 | 3 | 3.24 | 0.28 | 407.9  | 1 25/60 | 3.33 | 2.41 | 0.72 |
| 5852 - 5853 | K.GTDVQAWIR.G               | 1189.7 | 2 | 3.54 | 0.31 | 1063.8 | 1 16/16 | 3.49 | 3.26 | 0.93 |
| 5854 - 5855 | R.CELAAAMK.R                | 1170.8 | 2 | 3.30 | 0.31 | 2088.8 | 1 14/14 | 3.33 | 3.02 | 0.91 |
| 5857 - 5858 | R.NLNCNPCSALLSSDITASVNCAK.K | 2763.7 | 3 | 5.09 | 0.52 | 1060.5 | 1 33/88 | 4.81 | 5.42 | 1.13 |
| 5869 - 5870 | R.WWCNDGR.T                 | 1126.6 | 2 | 2.04 | 0.21 | 667.9  | 1 12/12 | 2.12 | 2.11 | 0.99 |
| 5884 - 5885 | R.GYSLGNVWVCAAK.F           | 1603.0 | 3 | 3.00 | 0.30 | 1015.4 | 1 24/44 | 2.92 | 2.41 | 0.82 |
| 5927 - 5928 | R.NTDGSTDYGILQINSR.W        | 1898.0 | 3 | 2.92 | 0.16 | 308.5  | 2 21/60 | 2.88 | 2.40 | 0.83 |
| 5942 - 5943 | R.NLNCNPCSALLSSDITASVNCAK.K | 2763.7 | 3 | 5.78 | 0.54 | 1682.2 | 1 36/88 | 5.62 | 4.97 | 0.88 |
| 5947 - 5948 | R.CELAAAMK.R                | 1170.8 | 3 | 3.34 | 0.31 | 2174.8 | 1 14/14 | 3.48 | 3.02 | 0.87 |
| 5954 - 5955 | K.GTDVQAWIR.G               | 1189.7 | 2 | 3.46 | 0.34 | 1090.9 | 1 16/16 | 3.47 | 3.29 | 0.95 |
| 5964 - 5965 | R.GYSLGNVWVCAAK.F           | 1603.0 | 3 | 4.49 | 0.65 | 1226.3 | 1 22/22 | 4.49 | 5.19 | 1.15 |
| 5972 - 5973 | R.GYSLGNVWVCAAK.F           | 1603.0 | 3 | 2.68 | 0.24 | 789.8  | 1 22/44 | 2.6  | 2.40 | 0.92 |
| 5979 - 5980 | R.WWCNDGR.T                 | 1126.6 | 2 | 2.01 | 0.22 | 633.6  | 1 12/12 | 2.07 | 2.07 | 1.00 |
| 6032 - 6033 | R.NLNCNPCSALLSSDITASVNCAK.K | 2763.7 | 3 | 6.03 | 0.47 | 1778.7 | 1 35/88 | 5.71 | 5.92 | 1.04 |
| 6047 - 6048 | K.GTDVQAWIR.G               | 1189.7 | 3 | 2.92 | 0.39 | 1179.5 | 1 16/16 | 3.17 | 2.99 | 0.94 |
| 6084 - 6085 | R.CELAAAMK.R                | 1170.8 | 3 | 3.15 | 0.30 | 1968.3 | 1 14/14 | 3.22 | 2.97 | 0.92 |
| 6152 - 6153 | K.GTDVQAWIR.G               | 1189.7 | 3 | 2.40 | 0.22 | 733.5  | 3 15/16 | 2.64 | 2.25 | 0.85 |
| 6217 - 6218 | R.GYSLGNVWVCAAK.F           | 1603.0 | 3 | 4.09 | 0.67 | 762.7  | 1 22/22 | 3.89 | 4.37 | 1.12 |
| 6224 - 6225 | R.NLNCNPCSALLSSDITASVNCAK.K | 2763.7 | 3 | 5.45 | 0.55 | 988.5  | 1 34/88 | 5.14 | 5.11 | 0.99 |
| 6314 - 6315 | R.NLNCNPCSALLSSDITASVNCAK.K | 2763.7 | 3 | 3.63 | 0.49 | 342.1  | 1 26/88 | 3.43 | 3.62 | 1.05 |
| 6367 - 6368 | K.GTDVQAWIR.G               | 1189.7 | 2 | 3.69 | 0.35 | 1089.2 | 1 16/16 | 3.61 | 3.55 | 0.98 |
| 6374 - 6375 | R.NTDGSTDYGILQINSR.W        | 1898.0 | 3 | 3.16 | 0.16 | 474.7  | 1 23/60 | 3.06 | 2.97 | 0.97 |
| 6377 - 6378 | R.GYSLGNVWVCAAK.F           | 1603.0 | 3 | 2.82 | 0.23 | 1331.6 | 1 25/44 | 2.77 | 2.78 | 1.00 |
| 6399 - 6400 | R.CELAAAMK.R                | 1170.8 | 2 | 3.33 | 0.29 | 2089.9 | 1 14/14 | 3.37 | 3.35 | 0.99 |
| 6439 - 6440 | K.FESNFNTQATNR.N            | 1572.8 | 2 | 4.92 | 0.52 | 1985.6 | 1 22/22 | 4.6  | 4.53 | 0.98 |
| 6452 - 6453 | K.GTDVQAWIR.G               | 1189.7 | 2 | 2.78 | 0.39 | 1130.9 | 1 16/16 | 3.23 | 3.19 | 0.99 |
| 6454 - 6455 | R.WWCNDGR.T                 | 1126.6 | 2 | 2.18 | 0.32 | 758.8  | 1 12/12 | 2.16 | 2.11 | 0.97 |
| 6459 - 6460 | R.GYSLGNVWVCAAK.F           | 1603.0 | 3 | 2.86 | 0.20 | 1161.0 | 1 23/44 | 2.88 | 2.65 | 0.92 |
| 6469 - 6470 | R.CELAAAMK.R                | 1170.8 | 3 | 3.39 | 0.33 | 2023.4 | 1 14/14 | 3.39 | 2.74 | 0.81 |
| 6509 - 6510 | K.FESNFNTQATNR.N            | 1572.8 | 3 | 4.90 | 0.48 | 2042.7 | 1 22/22 | 4.94 | 4.92 | 0.99 |
| 6522 - 6523 | R.WWCNDGR.T                 | 1126.6 | 3 | 2.64 | 0.35 | 774.4  | 1 12/12 | 2.6  | 2.31 | 0.89 |
| 6527 - 6528 | K.GTDVQAWIR.G               | 1189.7 | 3 | 4.02 | 0.35 | 1086.2 | 1 16/16 | 4.07 | 3.97 | 0.97 |
| 6539 - 6540 | R.CELAAAMK.R                | 1170.8 | 3 | 3.50 | 0.34 | 2083.5 | 1 14/14 | 3.43 | 3.43 | 1.00 |
| 6574 - 6575 | K.FESNFNTQATNR.N            | 1572.8 | 3 | 4.99 | 0.52 | 2289.9 | 1 22/22 | 4.9  | 4.99 | 1.02 |
| 6642 - 6643 | K.FESNFNTQATNR.N            | 1572.8 | 3 | 5.25 | 0.50 | 2435.4 | 1 21/22 | 5    | 4.98 | 1.00 |
| 6672 - 6673 | K.FESNFNTQATNR.N            | 1572.8 | 3 | 3.32 | 0.37 | 844.3  | 1 22/44 | 3.14 | 3.20 | 1.02 |
