# Supplementary material
Source: PubMed Central journal article supplement (PMC3183836)
Supplement: NIHMS324680-supplement-supp_table_4.pdf [file NIHMS324680-supplement-supp_table_4.pdf]

|                 |                                                                                                                                     |        |   |      |      |       |    |               |      |           |
|-----------------|-------------------------------------------------------------------------------------------------------------------------------------|--------|---|------|------|-------|----|---------------|------|-----------|
| 3612 - 3613     | K.ET*EGGNHSSGKS*GGFDV/KALR.A                                                                                                        | 2293.0 | 2 | 2.39 | 0.12 | 366.9 | 3  | 18/80         | 2.33 | 0.00      |
| 115 RS18_MOUSE  | RecName: Full=40S ribosomal protein S18; AltName: Full=Ke-3; Short=Ke3                                                              |        |   |      |      |       |    | 1 (1 0 0 0 0) |      |           |
| 2664 - 2665     | R.AGELTEDEVER.V                                                                                                                     | 1247.6 | 2 | 2.39 | 0.24 | 417.2 | 4  | 12/20         | 2.01 | 0.00      |
| 116 FRAP_MOUSE  | RecName: Full=FKBP12-rapamycin complex-associated protein; AltName: Full=FK506-binding protein 12-rapamycin complex-associate       |        |   |      |      |       |    | 1 (1 0 0 0 0) |      |           |
| 4162 - 4163     | R.LMDT*NT*KGNK.R                                                                                                                    | 1297.5 | 2 | 2.34 | 0.15 | 452.5 | 10 | 17/36         | 2.54 | #VALUE!   |
| 117 DOPD_MOUSE  | RecName: Full=D-dopachrome decarboxylase; AltName: Full=D-dopachrome tautomerase                                                    |        |   |      |      |       |    | 1 (1 0 0 0 0) |      |           |
| 2564 - 2565     | R.IPAGLENR.L                                                                                                                        | 869.5  | 2 | 2.28 | 0.19 | 691.8 | 1  | 13/14         | 2.64 | 2.21 0.84 |
| 118 CTND2_MOUSE | RecName: Full=Catenin delta-2; AltName: Full=Neural plakophilin-related ARM-repeat protein; Short=NPRAP; AltName: Full=Neurojur     |        |   |      |      |       |    | 1 (1 0 0 0 0) |      |           |
| 5819 - 5820     | K.DGWSQYHFVASS*S*T*IER.D                                                                                                            | 2209.8 | 2 | 2.27 | 0.14 | 166.4 | 9  | 18/80         |      | #VALUE!   |
| 119 FOLR4_MOUSE | RecName: Full=Probable folate receptor delta; Short=FR-delta; AltName: Full=Folate receptor 4; AltName: Full=Folate-binding proteir |        |   |      |      |       |    | 1 (1 0 0 0 0) |      |           |
| 3002 - 3003     | K.LLSVCMNS*K.R                                                                                                                      | 1147.5 | 2 | 2.25 | 0.22 | 520.0 | 1  | 16/24         |      | #VALUE!   |
| 120 CC114_MOUSE | RecName: Full=Coiled-coil domain-containing protein 114                                                                             |        |   |      |      |       |    | 1 (1 0 0 0 0) |      |           |
| 4539 - 4540     | R.GRES*T*AGGVHSQS*MGSELSR.G                                                                                                         | 2288.8 | 2 | 2.23 | 0.12 | 250.0 | 3  | 27/95         | 2.17 | 0.00      |
| 121 NOTC3_MOUSE | RecName: Full=Neurogenic locus notch homolog protein 3; Short=Notch 3; Contains: RecName: Full=Notch 3 extracellular truncation;    |        |   |      |      |       |    | 1 (1 0 0 0 0) |      |           |
| 3869 - 3870     | R.Y*GGKCLDLVDK.Y                                                                                                                    | 1347.6 | 2 | 2.22 | 0.09 | 227.9 | 10 | 16/30         |      | #VALUE!   |
| 122 K1B16_MOUSE | RecName: Full=Kallikrein 1-related peptidase b16; AltName: Full=Gamma-renin, submandibular gland; Short=mGK-16; Flags: Precursr     |        |   |      |      |       |    | 1 (1 0 0 0 0) |      |           |
| 5644 - 5645     | K.LDS*TCLV*S*GWGS*ITPTK.W                                                                                                           | 2061.8 | 2 | 2.22 | 0.09 | 155.0 | 8  | 21/80         |      | #VALUE!   |
| 123 IDHC_MOUSE  | RecName: Full=Isocitrate dehydrogenase [NADP] cytoplasmic; Short=IDH; AltName: Full=Cytosolic NADP-isocitrate dehydrogenase; A      |        |   |      |      |       |    | 1 (1 0 0 0 0) |      |           |
| 2059 - 2060     | K.TVEAAEAHGTVTR.H                                                                                                                   | 1341.7 | 2 | 2.19 | 0.19 | 303.4 | 6  | 11/24         |      | #VALUE!   |
| 124 THIL_MOUSE  | RecName: Full=Acetyl-CoA acetyltransferase, mitochondrial; AltName: Full=Acetoacetyl-CoA thiolase; Flags: Precursor                 |        |   |      |      |       |    | 1 (1 0 0 0 0) |      |           |
| 1987 - 1988     | R.QEQDYYALSSYTR.S                                                                                                                   | 1561.7 | 2 | 2.13 | 0.09 | 190.7 | 3  | 12/24         |      | #VALUE!   |
| 125 TBX10_MOUSE | RecName: Full=T-box transcription factor TBX10; Short=T-box protein 10; AltName: Full=T-box protein 13; AltName: Full=MmTBX7        |        |   |      |      |       |    | 1 (1 0 0 0 0) |      |           |
| 4409 - 4410     | R.EADPDS*WPVTPRPLLSIPAR.S                                                                                                           | 2297.1 | 2 | 2.07 | 0.15 | 208.7 | 5  | 16/57         |      | #VALUE!   |
| 126 PRAF1_MOUSE | RecName: Full=Prenylated Rab acceptor protein 1; AltName: Full=PRA1 family protein 1; AltName: Full=Prerilyn                        |        |   |      |      |       |    | 1 (1 0 0 0 0) |      |           |
| 2407 - 2408     | K.DAEGEGLS*AT*T*LLPK.L                                                                                                              | 1741.7 | 2 | 2.01 | 0.09 | 225.9 | 1  | 23/70         |      | #VALUE!   |
